# Supplementary material for: Immunization Associated with Erectile Dysfunction Based on Cross-Sectional and Genetic Analyses
Source: PLoS One. 2014 Oct 24;9(10):e111269. doi: 10.1371/journal.pone.0111269 (PMC4208848; doi:10.1371/journal.pone.0111269)
Supplement: Table S4 — The primary data used in the study for IgG. (XLS) [file pone.0111269.s004.xls]

## Sheet: Sheet1
Table S4
Sample_ID	Gender	age	SBP	DBP	height	weight	BMI	waist	buttocks	WHR	fasting glucose	triglycerides	HDL	IgG	lnIgG	A01	B01	B02	C01	D01	D02	D03	D04	D05	IIEF_ED	binary_ED
H1000	male	37	160	110	170.2	85	29.3427	93	100	0.93	5.3	0.98	1.41	14.78	2.69327	3	2		1	4	5	5	5	5	24	2
H1003	male	38	130	82	177.4	77	24.4672	85.6	98	0.873469	5.1	1.43	1.34	11.27	2.42214	3	1	1	1	5	5	5	5	5	25	2
H1004	male	25	102	72	169	61.5	21.5329	71	91	0.78022	5.4	0.78	1.75	9.83	2.28544	3	2		1	3	5	5	5	4	22	2
H1005	male	39	136	90	169	80	28.0102	88.5	97	0.912371	5.2	3.11	1.27	11.02	2.39971	3	1	1	1	1	2	4	3	5	15	1
H1009	male	44	120	82	175	87	28.4082	98.7	99.3	0.993958	6.3	2.66	1.24	12.97	2.56264	3	2		1	3	5	4	5	5	22	2
H1012	male	34	120	80	167	76	27.2509	81	96.3	0.841121	5.7	5	1.17	12.89	2.55645	3	1	1	1	5	5	5	5	5	25	2
H1015	male	39	106	70	170.2	67	23.1289	72.6	92	0.78913	5.2	1.45	1.15	9.69	2.27109	3	1	1	1	4	4	4	5	4	21	1
H1019	male	48	116	80	170	81.5	28.2007	99	98	1.0102	5	1.88	0.94	15.95	2.76946	3	2		1	3	5	5	5	5	23	2
H1021	male	39	116	80	173	82	27.3982	93.5	102.5	0.912195	4.5	0.69	1.2	15.26	2.72524	3	1	1	1	3	4	4	5	4	20	1
H1023	male	37	118	80	171	67.5	23.084	82	90	0.911111	5	3.88	0.96	13.97	2.63691	2	2		1	3	4	5	5	5	22	2
H1025	male	51	126	80	164	81	30.116	94.1	99.3	0.947633	6.6	4.51	1.37	7.99	2.07819	3	1	1	1	3	3	3	5	4	18	1
H1026	male	34	110	80	171.9	62	20.9817	75.8	89	0.851685	4.5	1.43	1.96	14.42	2.66862	3	1	1	1	5	5	5	5	5	25	2
H1027	male	43	130	80	169.7	61	21.182	76	90.8	0.837004	5.4	1.01	1.72	9.61	2.2628	3	1	1	1	3	4	4	5	5	21	1
H1028	male	39	110	70	167	66.5	23.8445	87.4	89.5	0.976536	4.9	0.89	1.28	12.43	2.52011	3	1	1	1	4	5	5	5	5	24	2
H1029	male	32	128	80	172	73	24.6755	82.9	93.5	0.886631	4.9	1.65	1.18	13.29	2.58701	3	1	1	1	5	5	5	5	5	25	2
H1030	male	37	130	88	178	66.5	20.9885	79.3	90.5	0.876243	4.3	0.23	1.6	14.1	2.64617	3	1	1	1	3	4	4	5	4	20	1
H1033	male	39	128	80	168.3	56.5	19.9471	71.2	84.3	0.844603	5.1	0.93	1.99	15.61	2.74791	3	1	1	2	5	5	5	5	5	25	2
H1035	male	39	110	88	181	86	26.2507	88.7	101	0.878218	6.6	0.96	1.94	10.25	2.32728	3	2		1	4	5	5	5	5	24	2
H1036	male	34	116	80	172	70	23.6614	75	92	0.815217	6.3	1.07	1.38	12.08	2.49155	3	1	1	1	4	5	5	5	5	24	2
H1038	male	46	120	78	173.1	86	28.7015	107	100.5	1.06468	5.9	3.69	1.16	10.6	2.36085	3	2		1	4	4	4	4	4	20	1
H1039	male	33	100	70	170	68	23.5294	87.5	91	0.961538	6.1	5.11	1	9.39	2.23965	3	1	1	1	0	4	1	3	2	10	1
H1043	male	31	102	70	170.7	77	26.4255	86.5	98	0.882653	4.9	1.76	1.35	9.08	2.20607	3	2		1	4	3	3	4	5	19	1
H1045	male	25	112	80	168.3	62	21.8889	80.5	91	0.884615	4.6	1.38	1.06	12.04	2.48823	3	1	1	1	5	5	4	5	4	23	2
H1046	male	25	116	70	185.7	82	23.7788	89	99	0.89899	4.9	1.71	1.49	15.01	2.70872	3	2		1	4	5	5	5	5	24	2
H1047	male	36	124	90	170.7	73.5	25.2244	80.5	95.2	0.845588	5.8	1.18	1.22	10.27	2.32923	3	1	1	1	3	4	4	4	3	18	1
H1050	male	48	100	70	167.1	65	23.2788	82.5	92	0.896739	5	3.43	1.12	11.45	2.43799	3	1	1	1	4	5	4	5	5	23	2
H1051	male	43	116	82	172.8	83.5	27.964	96	100.5	0.955224	5.5	1.44	1.3	14.3	2.66026	3	1	1	1	4	4	4	4	4	20	1
H1052	male	35	100	78	172	75	25.3515	87	97	0.896907	4.9	1.04	1.97	9.97	2.29958	3	1	1	1	4	5	5	5	4	23	2
H1053	male	49	180	110	175	92	30.0408	100.2	102	0.982353	5.3	1.5	1.27	12.06	2.48989	3	2		2	5	5	5	5	5	25	2
H1057	male	45	110	86	167	69	24.7409	87.6	89.5	0.978771	5.6	2.51	1.35	14.9	2.70136	3	2		1	3	4	4	5	4	20	1
H1061	male	38	140	100	162.7	71.5	27.0104	92.9	96.7	0.960703	5.4	1.12	1.1	12.82	2.55101	3	1	1	1	3	5	5	5	4	22	2
H1068	male	35	110	76	179	69.5	21.691	79	92	0.858696	5.6	0.83	1.62	12.56	2.53052	3	1	1	1	5	5	5	5	5	25	2
H1069	male	31	110	70	174.7	79.5	26.0484	91	100	0.91	5.7	1.65	1.4	10.72	2.37211	3	2		1	4	4	4	5	4	21	1
H1072	male	47	100	70	170	69	23.8754	88.5	94	0.941489	5.5	2.3	1.2	15.87	2.76443	3	2		1	5	5	5	5	5	25	2
H1073	male	44	130	90	167	72.5	25.9959	92	97	0.948454	6.8	4.62	0.83	11.88	2.47486	3	1	1	1	3	4	5	5	4	21	1
H1074	male	36	110	88	166.6	86.5	31.1649	101	107	0.943925	6.2	2.15	1.12	15.5	2.74084	3	1	1	1	4	4	4	5	4	21	1
H1077	male	29	126	68	170	66	22.8374	72.5	96.5	0.751295	5.7	1.98	1.41	10.52	2.35328	3	2		1	5	5	5	5	5	25	2
H1084	male	32	114	80	176.5	79	25.3593	86	97.5	0.882051	6.1	4.1	1.02	14.8	2.69463	3	2		1	4	5	5	5	5	24	2
H1086	male	24	90	60	159.1	66	26.0738	85.8	94	0.912766	5.2	1	1.16	10.87	2.38601	3	2		1	5	5	5	5	5	25	2
H1088	male	41	120	80	174.6	75	24.6021	85.1	97	0.87732	5.6	1.15	1.5	11.01	2.3988	3	2		1	3	5	5	5	4	22	2
H1092	male	26	116	78	167.6	64	22.7841	79	90.3	0.874862	5	0.41	1.65	10.59	2.35991	3	1	1	1	4	5	5	5	5	24	2
H1093	male	41	122	80	165	76.5	28.0992	97	100.7	0.963257	5.2	2.59	1.08	11.4	2.43361	3	1	1	1	3	4	2	3	2	14	1
H1101	male	37	100	60	163.7	52.5	19.5912	68	83.3	0.816327	4.3	0.43	2.44	11.87	2.47401	3	1	1	1	3	3	3	5	5	19	1
H1107	male	66	136	90	170.3	60	20.6882	77.3	89	0.868539	5.1	0.76	2.07	9.26	2.2257	1	1	1	1	3	3	3	3	3	15	1
H1109	male	66	144	94	170	68.5	23.7024	82.6	91.7	0.900763	5.3	1.23	1.12	10.03	2.30558	2	2		1	1	1	2	3	2	9	1
H1115	male	33	110	70	166	65.5	23.7698	83.7	92.5	0.904865	4	0.95	1.08	9.46	2.24707	3	1	1	1	4	5	5	5	5	24	2
H1116	male	66	130	80	159.6	75	29.4439	99	101.7	0.973451	5.1	1.7	1.27	10.75	2.37491	2	1	1	1	3	3	3	4	2	15	1
H1121	male	45	150	100	171.5	72.5	24.6496	88	92.6	0.950324	8	3.04	1.53	13.92	2.63333	3	1	1	1	3	5	4	5	4	21	1
H1122	male	40	124	96	166.2	76	27.5139	89	97.5	0.912821	18.2	17.8	4.52	11.27	2.42214	3	2		1	5	5	5	5	5	25	2
H1132	male	30	110	80	166.7	67.5	24.2903	90.5	97	0.93299	5.7	4.25	1.12	11.7	2.45959	3	1	1	1	4	5	5	5	4	23	2
H1133	male	38	128	76	176.5	80	25.6803	88.1	97	0.908247	4.9	2.53	1.15	16.03	2.77446	3	2		1	3	2	4	5	4	18	1
H1134	male	38	108	68	169	56.5	19.7822	72	87	0.827586	6	1.55	1.6	13.32	2.58927	3	1	1	1	3	3	3	4	3	16	1
H1136	male	28	130	70	162.2	45	17.1045	61.5	80	0.76875	5.6	1.23	1.32	12.34	2.51285	3	1	1	1	3	5	5	5	4	22	2
H1138	male	30	120	84	163.1	60.5	22.743	78	88.5	0.881356	5.2	2.79	1.47	13.56	2.60712	2	1	1	1	5	5	5	5	5	25	2
H1140	male	27	126	70	171.8	75	25.4106	86.5	101	0.856436	5.2	0.67	1.34	7.53	2.0189	3	1	1	1	5	5	5	5	5	25	2
H1146	male	33	190	110	168	86	30.4705	92.8	98	0.946939	5.5	2.6	1.35	9.03	2.20055	3	1	1	1	5	5	5	5	5	25	2
H1150	male	36	130	90	175.2	80	26.0628	89.6	99.6	0.899598	5.6	0.92	1.18	9.68	2.27006	2	1	1	1	3	2	2	4	5	16	1
H1151	male	66	114	80	166.5	63.5	22.9058	82	92	0.891304	5.4	1.28	1.45	10.24	2.3263	2	2		1	3	3	4	5	4	19	1
H1156	male	60	90	60	157	59	23.9361	82.3	89.3	0.921613	7	1.22	1.26	12.11	2.49403	1	2		1	2	2	2	2	2	10	1
H1161	male	69	150	80	156.1	61	25.0336	84	90	0.933333	5.9	1.64	1.43	10.32	2.33408	2	2		1	1	1	2	2	1	7	1
H1162	male	27	110	70	164.3	65.5	24.2642	80.7	91.8	0.879085	5.1	1.87	1.19	10.66	2.3665	3	1	1	1	5	5	5	5	4	24	2
H1163	male	24	100	74	169	59.5	20.8326	73	91	0.802198	5.2	0.79	1.34	9.51	2.25234	3	2		1	5	5	4	5	4	23	2
H1164	male	25	110	68	169.2	69.5	24.2764	89	95	0.936842	5.1	1.07	1.29	11.01	2.3988	3	1	1	1	4	4	4	5	4	21	1
H1167	male	48	140	80	173.1	65	21.693	78.5	90.7	0.865491	5.4	1.35	1.39	9.34	2.23431	3	1	1	2	3	4	4	5	4	20	1
H117	male	38	120	80	164.9	69.5	25.559	84.2	94	0.895745	5.3	1.44	1.17	11.31	2.42569	3	1	1	1	5	5	5	5	5	25	2
H1173	male	43	144	96	165.5	54	19.715	80.4	90.5	0.888398	5.5	0.94	1.64	12.21	2.50226	2	2		2	3	3	3	5	5	19	1
H1174	male	40	120	76	158.5	53.5	21.2959	67	82	0.817073	5	0.9	1.91	9.98	2.30058	2	1	1	2	3	2	3	5	5	18	1
H1175	male	37	118	89	174.7	73.5	24.0825	89	95	0.936842	5.5	1.33	1.5	10.61	2.3618	3	2		1	5	5	5	5	5	25	2
H1176	male	36	160	86	172.9	50	16.7255	67.5	82	0.823171	4.8	1.06	1.71	8.81	2.17589	2	1	1	1	4	4	5	5	5	23	2
H1178	male	37	120	80	174	61	20.148	92.7	96.8	0.957645	4.8	0.6	1.37	10.82	2.3814	3	1	1	1	3	3	4	5	4	19	1
H118	male	34	110	60	167.9	55	19.5102	75.5	86	0.877907	4.7	0.94	1.53	12.57	2.53131	3	1	1	1	3	5	4	5	4	21	1
H1180	male	34	110	70	165.7	70	25.4949	88	92	0.956522	4.8	1.26	1.36	7.71	2.04252	3	1	1	1	5	5	5	5	5	25	2
H1182	male	36	124	80	173.4	82.5	27.4382	99.5	104	0.956731	5.3	1.58	0.96	9.2	2.2192	3	1	1	1	4	5	5	5	5	24	2
H1184	male	48	120	80	169.5	78.5	27.3231	73.7	99	0.744444	5.7	1.08	1.63	15.09	2.71403	3	2		1	5	5	5	5	5	25	2
H1185	male	31	120	80	165	78	28.6501	89.7	101	0.888119	5.6	4.31	1.22	10.62	2.36274	3	1	1	1	5	5	5	5	5	25	2
H1186	male	52	132	80	158.6	78.5	31.2078	98	99.5	0.984925	5.1	1.36	1.42	11.67	2.45702	1	2		1	4	4	4	4	4	20	1
H1190	male	40	128	84	172.5	80.5	27.0531	91	100	0.91	6	1.46	1.35	9.87	2.2895	3	1	1	2	3	4	4	5	4	20	1
H1191	male	30	112	82	171.5	80	27.1996	92	104	0.884615	5	1.12	1.49	10.08	2.31055	3	1	1	1	5	5	5	5	5	25	2
H1194	male	26	130	60	170	72	24.9135	85.7	98	0.87449	6.1	5.72	1.42	9.65	2.26696	3	2		1	3	3	3	2	3	14	1
H1195	male	42	126	80	176.1	69.5	22.4113	80.5	92	0.875	5.7	0.62	1.84	9.13	2.21157	3	2		1	4	5	4	5	4	22	2
H1198	male	43	130	80	174	79	26.0933	86.5	98.7	0.876393	5.4	1.83	1.97	8.92	2.1883	3	2		1	4	3	1	5	5	18	1
H1199	male	43	100	60	157.6	52.5	21.1372	73.1	88	0.830682	5.2	0.5	1.08	10.54	2.35518	3	2		1	4	5	5	5	4	23	2
H1200	male	35	120	90	167	66	23.6652	86	93.2	0.922747	4.1	1.49	1.26	11.73	2.46215	3	1	1	1	4	4	3	5	4	20	1
H1201	male	39	110	70	166.6	58.5	21.0769	74	89.6	0.825893	5	1.34	1.38	15.59	2.74663	3	1	1	2	3	4	4	5	5	21	1
H1202	male	51	128	74	164.5	72	26.6073	87.2	98.5	0.885279	4.9	2.52	1.24	13.25	2.584	2	2		1	1	1	2	3	2	9	1
H1203	male	56	136	76	166.2	58	20.9974	78	91	0.857143	5.6	0.74	2.02	13.54	2.60565	3	1	1	2	3	4	4	5	4	20	1
H1204	male	34	126	80	167.1	62.5	22.3835	73.5	88.6	0.829571	5.5	1.27	1.4	13.84	2.62756	3	1	1	1	3	3	2	3	3	14	1
H1207	male	27	110	78	166	49	17.782	67.5	79.3	0.851198	5.3	0.53	1.76	16.09	2.7782	3	2		1	4	5	5	5	5	24	2
H1208	male	47	118	74	170.6	62	21.3027	76.4	91.5	0.834973	5.3	1.37	1.47	15.11	2.71536	3	1	1	1	4	4	4	4	4	20	1
H1209	male	41	126	80	160	63	24.6094	83.4	88.5	0.942373	5.6	0.97	1.67	13.36	2.59227	3	1	1	1	4	5	5	5	5	24	2
H1210	male	45	120	70	178.6	76.5	23.9827	83	95.2	0.871849	5.6	0.94	1.53	14.12	2.64759	3	1	1	1	3	4	5	4	4	20	1
H1211	male	46	100	70	172	61	20.6193	74.3	90	0.825556	5.2	0.32	1.5	13.61	2.6108	3	2		1	3	4	3	3	3	16	1
H1216	male	41	110	76	180	62.5	19.2901	71.5	91	0.785714	5.6	0.54	1.85	15.3	2.72785	3	2		2	3	5	4	5	4	21	1
H1217	male	59	120	80	172.5	69	23.1884	83	92.5	0.897297	6	0.74	1.48	10.89	2.38784	3	1	1	1	4	4	4	5	4	21	1
H1219	male	26	132	80	168	67	23.7387	80.5	93.4	0.861884	5.8	4.96	1.39	15.4	2.73437	2	2		1	3	2	2	0	2	9	1
H1221	male	35	100	70	158.3	62	24.7417	85	93	0.913978	5.2	1.56	1.12	13.25	2.584	2	2		1	3	3	3	5	5	19	1
H1227	male	46	120	80	159.5	60.5	23.7812	81.7	88.9	0.91901	5.2	1.82	1.19	14.18	2.65183	3	1	1	1	0	2	2	3	2	9	1
H1229	male	27	104	70	174.8	54.5	17.8367	71.5	86	0.831395	5.3	1.15	2	9.81	2.2834	1	1	1	1	5	5	5	5	5	25	2
H1231	male	32	106	78	176.8	66	21.1144	87.9	91.5	0.960656	5.4	0.9	1.63	14.33	2.66236	3	2		1	3	4	4	4	4	19	1
H1232	male	38	130	80	159.8	58.5	22.9088	75.2	86.3	0.871379	5.8	1.66	2.02	11.79	2.46725	3	2		1	3	2	2	4	4	15	1
H1236	male	35	128	80	165.7	54	19.6675	71	84.5	0.840237	5.3	0.75	1.31	16.08	2.77758	2	2		1	3	3	3	4	4	17	1
H1238	male	31	106	70	168.1	62	21.941	76.1	87.5	0.869714	6.6	3.31	1.53	13.52	2.60417	3	1	1	1	5	5	5	5	5	25	2
H1242	male	23	124	78	175	76.5	24.9796	82.7	99	0.835354	5	0.69	1.37	11.02	2.39971	3	1	1	1	3	2	2	2	2	11	1
H1244	male	46	100	70	165.1	75.5	27.6983	85.5	97	0.881443	5.9	2.46	0.94	14.67	2.6858	2	2		1	5	5	4	5	5	24	2
H1245	male	45	104	70	166.3	63.5	22.9609	88	91	0.967033	6.6	1.54	1.11	10.21	2.32337	3	1	1	1	5	5	5	5	5	25	2
H1246	male	34	120	70	175.6	77.5	25.1335	93.1	98.5	0.945178	5.1	3.2	1.29	10.42	2.34373	3	1	1	1	5	5	5	5	5	25	2
H1247	male	29	124	82	172.3	77	25.937	86	97.5	0.882051	5.4	3.87	1.06	13.64	2.61301	2	1	1	1	3	2	0	5	4	14	1
H1253	male	39	104	78	159.5	50	19.6539	70.5	80.6	0.87469	4.3	0.64	1.78	9.49	2.25024	2	1	1	1	3	2	2	5	2	14	1
H1255	male	22	134	80	174.5	88.5	29.0638	95.5	104.5	0.913876	5.5	1.82	1.15	10.24	2.3263	3	1	1	1	5	5	5	5	5	25	2
H1258	male	37	100	70	163.2	58	21.7765	77	86.2	0.893271	4.9	1	1.19	12.99	2.56418	3	1	1	1	5	5	5	5	5	25	2
H1259	male	57	126	80	170.3	82	28.2738	90.3	99.2	0.910282	5.2	0.62	1.44	16.17	2.78316	3	1	1	1	2	2	4	5	4	17	1
H1267	male	36	100	70	164.6	54	19.9312	69	88.2	0.782313	4.7	0.78	1.46	12.84	2.55257	2	1	1	1	3	2	2	2	2	11	1
H1268	male	28	90	60	168	70	24.8016	80	92	0.869565	9.5	2.67	1.36	14.8	2.69463	3	1	1	1	4	4	4	5	4	21	1
H1269	male	60	126	76	162.6	69	26.098	88.5	94.5	0.936508	6.1	1.6	1.21	12.87	2.5549	2	2		1	3	2	2	4	3	14	1
H1280	male	31	100	70	174	61	20.148	71.5	88	0.8125	5.3	0.74	2.26	14.73	2.68989	3	2		2	3	1	2	5	4	15	1
H1281	male	38	116	78	169.2	61	21.3073	78	87.2	0.894495	4.8	1.74	0.89	15.32	2.72916	2	1	1	1	4	4	4	5	5	22	2
H1284	male	26	110	70	170.6	65	22.3334	75.7	91	0.831868	5.2	1.06	1.37	11.9	2.47654	3	2		1	4	4	4	5	4	21	1
H1289	male	40	108	70	166.5	68	24.529	79.4	94.5	0.840212	5.2	1.1	1.43	13.11	2.57338	3	2		1	4	5	5	5	4	23	2
H1290	male	43	110	78	161	78.5	30.2843	97.5	100.5	0.970149	5.8	1.02	1.09	14.57	2.67896	3	2		1	4	5	5	5	4	23	2
H1291	male	53	114	74	176.1	70	22.5725	84	94.5	0.888889	5.6	1.62	1.27	15.17	2.71932	3	2		2	3	4	4	5	4	20	1
H1293	male	44	116	70	170.6	84.5	29.0335	101.5	100	1.015	6.4	1.76	1.27	11.34	2.42834	3	2		1	3	2	2	5	4	16	1
H1294	male	43	130	92	172.5	87.5	29.4056	100.7	104.5	0.963636	5.4	2	1.03	15.58	2.74599	3	2		2	3	5	5	5	4	22	2
H1295	male	32	122	80	163.1	56	21.0514	73	83.5	0.874251	4.6	1.22	1.61	9.39	2.23965	3	1	1	1	5	5	5	5	5	25	2
H1297	male	31	140	70	167.5	76.5	27.2667	93.5	95.6	0.978033	5.2	2.06	1.03	11.76	2.4647	3	1	1	2	4	5	4	5	4	22	2
H1298	male	41	120	84	167.2	69	24.6818	86.7	97	0.893814	6.4	0.74	1.59	12.32	2.51122	3	1	1	1	4	5	5	5	5	24	2
H1299	male	36	128	80	173.5	88.5	29.3998	94.5	102.6	0.921053	5.5	1.55	1.27	12.47	2.52333	3	1	1	1	3	2	2	5	4	16	1
H1300	male	27	130	80	170	61	21.1073	77.9	91.6	0.850437	5.5	1.78	1.06	14.75	2.69124	3	1	1	1	0	5	5	5	5	20	1
H1302	male	28	114	74	172.5	72.5	24.3646	85	95.3	0.89192	4.6	2.74	1.3	14.12	2.64759	3	2		1	3	4	4	5	4	20	1
H1306	male	52	114	70	171.7	64	21.709	80.2	92.3	0.868906	4.7	1	1.64	13.2	2.58022	3	1	2	2	3	3	3	4	3	16	1
H1311	male	29	120	80	170	67.5	23.3564	78.8	93	0.847312	4.9	1.15	1.88	11.76	2.4647	3	2		1	4	5	5	5	5	24	2
H1312	male	44	108	70	165.1	65	23.8462	85.2	91.5	0.931148	5.4	1.85	0.88	10.77	2.37676	3	2		2	5	5	5	5	5	25	2
H1313	male	25	100	64	159	52	20.5688	76.3	86	0.887209	5.3	1.31	1.44	11.27	2.42214	3	2		2	5	5	5	5	5	25	2
H1314	male	30	126	80	170.6	63	21.6462	73	93.6	0.779915	5.5	0.93	1.51	12.23	2.50389	3	1	1	1	5	5	5	5	5	25	2
H132	male	34	110	76	163	56	21.0772	69.7	86.2	0.808585	5.5	1.2	1.28	16.08	2.77758	3	2		1	3	3	2	4	3	15	1
H1321	male	32	120	80	171.3	73.5	25.048	89.3	96.3	0.92731	5.9	5.27	0.99	13.17	2.57794	3	1	1	1	5	5	5	5	5	25	2
H1324	male	34	124	68	167.7	68.5	24.357	90	95.3	0.944386	4.8	1.78	1.69	9.04	2.20166	3	2		1	4	5	5	5	4	23	2
H1327	male	40	124	80	163.7	69	25.7485	85	92.3	0.92091	4.9	2.28	0.97	14.64	2.68376	3	2		1	3	4	4	5	4	20	1
H1329	male	45	100	60	165	69	25.3444	84.8	95	0.892632	5.7	2.64	1.02	11.33	2.42745	3	1	1	1	5	5	5	5	5	25	2
H1330	male	25	126	60	161.5	55	21.0871	71	84.8	0.837264	4.8	0.71	1.19	11.42	2.43537	3	1	1	1	3	5	5	5	4	22	2
H1331	male	27	118	78	172	60	20.2812	78.5	90	0.872222	5.1	0.72	1.34	16.52	2.80457	3	2		1	4	5	5	5	5	24	2
H1332	male	32	120	82	169.1	73.5	25.704	86	96.5	0.891192	5.6	3.82	1.1	16.52	2.80457	3	1	1	1	3	4	4	4	4	19	1
H1333	male	43	126	80	170.5	63	21.6716	76.5	88	0.869318	4.7	0.85	1.48	12.61	2.53449	2	1	1	2	2	2	2	2	2	10	1
H1334	male	42	120	80	172.6	77	25.8469	92	96.3	0.955348	4.4	4.39	1.19	13.54	2.60565	3	2		1	5	5	5	5	5	25	2
H1335	male	37	94	60	166	61	22.1367	81	91	0.89011	5	0.99	1.72	11.08	2.40514	3	1	1	1	3	4	4	5	4	20	1
H1339	male	30	96	68	168.5	56	19.7237	67.9	85	0.798824	5.1	1.21	1.37	11.54	2.44582	3	1	1	1	3	3	4	5	4	19	1
H1340	male	26	100	70	169.3	60	20.9333	71	87	0.816092	4.8	0.5	1.76	8.42	2.13061	3	1	1	1	3	4	4	5	5	21	1
H1341	male	33	136	86	162	86	32.7694	79.5	87.3	0.910653	4.3	2.25	1.22	12.36	2.51447	3	1	1	1	4	5	5	5	5	24	2
H1342	male	27	118	80	168.5	65	22.8936	70.3	86.2	0.815545	4.8	0.97	1.3	14.61	2.68171	3	1	1	2	3	4	4	5	4	20	1
H1343	male	25	150	90	168.7	52	18.2715	71	89	0.797753	5.1	0.68	1.45	15.67	2.75175	3	2		2	3	4	4	4	3	18	1
H1344	male	26	100	60	159.3	56	22.0677	72.5	85.5	0.847953	3.9	1.87	1.26	15.07	2.71271	2	2		1	5	0	0	0	0	5	1
H1345	male	30	104	70	165.6	66	24.0671	77.2	92.8	0.831897	4.7	0.99	1.21	12.52	2.52733	2	2		1	3	3	2	3	4	15	1
H1346	male	32	130	80	181	99.5	30.3715	100.2	107	0.936449	10.8	28.36	3.7	13.98	2.63763	3	1	1	1	4	4	5	5	4	22	2
H1347	male	32	120	80	175.6	71	23.0255	81	94.5	0.857143	5.1	0.76	1.36	14.3	2.66026	3	2		1	5	5	5	5	5	25	2
H1348	male	28	100	56	162.7	61	23.0438	72.4	82.5	0.877576	4.8	0.83	1.58	16.45	2.80033	3	2		2	4	4	4	5	5	22	2
H1354	male	25	110	70	168.2	47.5	16.7896	63.2	82	0.770732	4	0.73	1.87	12.89	2.55645	3	2		1	4	4	5	5	5	23	2
H1355	male	33	140	96	164.8	67	24.6695	88	94	0.93617	5	6.94	1.57	7.51	2.01624	3	1	1	1	5	5	5	5	4	24	2
H1356	male	36	130	80	165	74	27.1809	95	94.5	1.00529	6.6	1.56	1.46	15.02	2.70938	3	1	1	1	3	5	2	5	2	17	1
H1359	male	33	104	70	160	52	20.3125	71.4	82.3	0.867558	5.2	0.69	1.42	12.58	2.53211	2	2		1	5	5	5	5	5	25	2
H1361	male	32	128	70	171.1	78	26.6437	86.5	99	0.873737	4.8	2.7	1.18	11.65	2.45531	3	1	2	1	3	4	5	5	4	21	1
H1362	male	32	114	76	162.5	88.5	33.5148	102	106	0.962264	4.8	2.63	0.97	9.55	2.25654	3	1	1	1	4	5	5	5	4	23	2
H1363	male	52	130	76	169.3	82	28.6088	93	89.5	1.03911	5.6	4.89	0.9	10.73	2.37304	3	2		1	3	2	2	5	4	16	1
H1364	male	25	120	68	160	56.5	22.0703	69.6	87	0.8	4.4	1.06	1.59	15.07	2.71271	3	2		1	5	5	5	5	4	24	2
H1365	male	36	100	66	167.6	60	21.3601	74.8	82	0.912195	4.6	1.26	1.34	11.28	2.42303	3	1	1	1	4	4	5	5	4	22	2
H1368	male	29	120	70	167.5	63	22.4549	79.2	90	0.88	5.4	4.19	0.93	14.82	2.69598	3	1	1	1	4	5	5	5	5	24	2
H1369	male	34	140	80	164.2	74	27.4464	90.5	95	0.952632	5.4	4.29	1.18	10.96	2.39425	3	1	1	1	3	4	5	5	5	22	2
H1371	male	28	110	70	164.5	59	21.8032	76.5	86	0.889535	5.2	1.25	1.16	14.58	2.67965	2	1	1	1	4	4	5	5	4	22	2
H1372	male	37	120	80	168.1	59.5	21.0563	74	89	0.831461	4.7	0.71	1.47	12.77	2.5471	3	1	1	1	4	5	4	5	5	23	2
H1374	male	39	114	76	168.4	52.5	18.5129	65.5	85	0.770588	5.3	0.63	1.75	10.17	2.31944	3	1	1	1	3	5	5	5	5	23	2
H1375	male	40	130	78	169.2	75.5	26.3722	92.3	97	0.951546	5.4	1.17	1.12	16.36	2.79484	3	2		1	3	4	4	5	4	20	1
H1378	male	45	130	80	164.6	70.5	26.0213	82.8	93	0.890323	4.9	3.29	1.11	13.84	2.62756	3	2		2	4	3	3	5	5	20	1
H1379	male	44	120	80	165.6	65.5	23.8847	87.2	93	0.937634	5.3	0.95	0.99	14.96	2.70538	3	1	1	1	3	5	5	5	5	23	2
H1387	male	26	126	70	173.1	67	22.3605	83.3	94	0.88617	5.8	1.06	1.55	15.06	2.71204	3	1	1	1	5	5	5	5	5	25	2
H1388	male	26	126	76	173.2	58	19.3345	69	88	0.784091	5.4	0.64	1.19	14.44	2.67	3	2		1	4	5	5	5	5	24	2
H1390	male	21	90	60	170	51	17.6471	63.5	84	0.755952	4.9	1.06	1.84	13.36	2.59227	3	1	1	1	5	5	5	5	4	24	2
H1391	male	32	140	78	178.6	87	27.2745	92.4	103.7	0.891032	5.4	1.49	1.14	13.88	2.63045	3	2		1	4	4	4	4	4	20	1
H1393	male	39	120	70	168.5	71.5	25.1829	82	95	0.863158	5.4	1.91	1.37	13.76	2.62177	2	2		1	3	4	4	4	4	19	1
H1395	male	35	130	70	174.5	78	25.6156	86.4	98	0.881633	5	1.4	1.12	15.93	2.7682	3	2		1	3	4	5	5	4	21	1
H1396	male	41	120	88	170.8	58	19.8816	81.6	88.1	0.92622	5.1	0.85	1.84	14.29	2.65956	2	1	1	1	3	3	3	3	3	15	1
H1398	male	31	120	72	163.5	56	20.9485	72	85.5	0.842105	5.2	0.56	2.16	14.06	2.64333	3	1	1	1	3	4	5	5	5	22	2
H1399	male	25	124	80	170.8	58	19.8816	74	91	0.813187	5	0.45	1.61	16.36	2.79484	3	1	1	1	4	5	4	5	4	22	2
H1401	male	36	104	60	164.6	49	18.0857	67.2	82.2	0.817518	4.9	4.35	1.04	13.87	2.62973	3	1	1	1	3	4	4	5	4	20	1
H1402	male	27	124	64	175.6	75	24.3227	84	99	0.848485	4.8	1.31	1.31	10.77	2.37676	3	1	1	1	5	5	4	5	5	24	2
H1404	male	26	135	90	169	76	26.6097	86	94.5	0.910053	5.6	1.35	1.26	13.67	2.6152	2	1	2	1	3	3	3	3	3	15	1
H1406	male	34	132	88	161.5	59	22.6207	79.2	89.5	0.884916	4.9	3.19	1.37	12.7	2.5416	3	1	1	1	3	5	5	5	5	23	2
H1407	male	22	140	80	167	61.5	22.0517	75.6	88	0.859091	5	0.6	1.35	15.86	2.7638	3	2		1	3	4	4	5	5	21	1
H1409	male	25	120	70	169	57	19.9573	70	86	0.813953	4.7	0.59	1.35	15.21	2.72195	3	1	1	2	4	4	4	5	4	21	1
H1410	male	32	100	66	169.5	69	24.0165	76.1	90.8	0.838106	5	1.21	1.6	12.87	2.5549	3	1	1	1	4	4	4	5	4	21	1
H1411	male	32	138	80	174.5	96.5	31.691	99.6	108.5	0.917972	6.5	3.19	1.51	15.66	2.75111	3	1	1	1	4	5	5	5	4	23	2
H1412	male	31	102	70	164.5	64	23.6509	78.5	88	0.892045	5.3	1.18	1.15	12.18	2.4998	3	1	1	2	3	4	5	5	5	22	2
H1413	male	37	108	70	174.2	76	25.0448	86	92.5	0.92973	4.1	0.68	1.47	15.81	2.76064	3	2		1	3	4	5	5	4	21	1
H1428	male	26	104	70	165.1	54	19.8107	73.2	90	0.813333	5.2	1.67	1.11	13.57	2.60786	3	2		1	4	5	5	5	5	24	2
H1435	male	21	128	60	171.7	58	19.6738	71	89	0.797753	5.4	0.55	1.21	12.46	2.52252	3	1	1	1	5	0	0	0	0	5	1
H1438	male	25	108	68	171.7	74	25.101	87	101	0.861386	5.2	1.44	1.17	13.96	2.6362	3	1	1	1	4	5	4	5	4	22	2
H144	male	34	118	80	159.6	55	21.5922	72	88.5	0.813559	4.8	0.84	1.73	14	2.63906	3	2		1	4	5	5	5	4	23	2
H1440	male	30	110	70	170.5	63	21.6716	80	89	0.898876	4.6	2	1.51	14.36	2.66445	3	1	1	1	4	5	5	5	4	23	2
H1445	male	33	134	82	166.3	48.5	17.5371	66	83	0.795181	5.5	0.84	1.7	13.69	2.61667	3	1	1	1	4	5	5	5	4	23	2
H1447	male	35	120	60	158.1	58	23.2041	75.4	89.5	0.842458	5.5	0.82	1.3	14.78	2.69327	3	1	1	2	4	4	4	4	4	20	1
H145	male	35	150	90	168.6	72	25.329	85.3	95.3	0.895068	5.2	2.3	1.07	13.28	2.58626	3	2		2	2	5	3	2	3	15	1
H1452	male	26	100	76	162.7	49	18.5106	67.2	79.8	0.842105	4.9	0.65	1.56	12.96	2.56187	3	2		2	5	5	5	5	5	25	2
H1453	male	35	110	66	165.7	62	22.5812	85.1	90.7	0.938258	5	0.82	1.3	13.51	2.60343	3	1	1	1	3	4	5	5	4	21	1
H1457	male	27	108	60	170.7	65.5	22.4789	84.8	92	0.921739	5.1	0.61	1.54	11.21	2.41681	3	1	1	1	4	5	5	5	5	24	2
H1458	male	27	144	100	164.1	77.5	28.7796	87.2	96	0.908333	5.9	1.52	1.24	10.78	2.37769	3	1	1	1	4	5	4	4	4	21	1
H1459	male	35	124	80	169.8	69	23.9317	80.5	93.6	0.860043	4.7	1.35	1.07	15.44	2.73696	3	1	1	1	4	5	5	5	4	23	2
H1460	male	35	106	68	162.8	65.5	24.7134	85.2	91.5	0.931148	4.7	2.18	1.3	13.52	2.60417	3	1	1	1	4	4	5	5	4	22	2
H1463	male	23	110	76	171.2	49	16.7182	65.2	87.7	0.743444	5	0.63	1.51	14.2	2.65324	3	2		1	5	5	5	5	5	25	2
H1466	male	30	100	70	177.5	103	32.6919	106.7	108.5	0.98341	5.2	2.02	0.89	13.8	2.62467	3	2		1	4	5	5	5	4	23	2
H1470	male	53	130	80	164.2	54.5	20.2139	74.5	86.2	0.864269	5.1	0.46	2.07	14.03	2.6412	1	2		2	2	2	2	2	3	11	1
H1472	male	61	130	80	171.5	65.5	22.2696	88.1	93	0.947312	5.1	1.48	1.34	16.33	2.793	3	2		1	4	5	4	5	4	22	2
H1473	male	32	112	68	176	67.5	21.7911	79.6	90.3	0.881506	5.2	1.41	1.29	15.26	2.72524	3	2		1	4	4	4	4	4	20	1
H1475	male	32	140	78	164.5	49	18.1077	70.6	80	0.8825	6.2	0.89	1.54	14.02	2.64048	3	1	1	1	5	5	4	5	2	21	1
H1476	male	37	108	70	170.5	59	20.2957	81.5	83.4	0.977218	5.2	1.05	1.78	12.01	2.48574	2	1	1	1	3	5	5	5	5	23	2
H1477	male	47	120	84	172	82	27.7177	99	98	1.0102	6.2	13.34	3.12	9.49	2.25024	3	1	1	1	3	2	3	4	3	15	1
H1479	male	32	114	60	157.6	43	17.3124	63	78.7	0.800508	4.7	0.44	1.69	12.27	2.50716	3	1	1	1	4	5	5	5	5	24	2
H1480	male	35	144	100	163.5	71	26.5597	90.2	98.5	0.915736	5.7	1.68	1.73	10.58	2.35897	2	1	2	1	5	5	5	5	5	25	2
H1481	male	25	118	70	177.5	59.5	18.8851	70	90	0.777778	4.7	1.49	1.64	11.42	2.43537	3	1	1	1	4	4	4	5	3	20	1
H1482	male	30	114	62	169.5	61	21.232	79.8	91.7	0.870229	9.3	2.5	1.19	15.33	2.72981	2	1	1	1	5	5	5	5	5	25	2
H1492	male	26	124	88	173	60.5	20.2145	79.3	90	0.881111	7.4	20.35	3.86	11.04	2.40153	3	1	1	1	3	3	3	3	3	15	1
H1493	male	34	110	70	176	80	25.8264	88.1	100.6	0.875746	5.4	1.41	1.3	12.34	2.51285	3	2		1	5	5	5	5	5	25	2
H1494	male	34	120	80	172	74.5	25.1825	92	92.5	0.994595	6.4	3.32	1.08	14.68	2.68649	3	2		1	5	5	5	5	5	25	2
H1496	male	31	110	70	172.2	58	19.5597	71.4	86.7	0.823529	5.8	0.54	1.24	14.89	2.70069	3	1	1	1	4	3	3	4	4	18	1
H15	male	41	116	68	161	51	19.6752	68.3	83	0.822892	5.7	0.48	2.2	14.01	2.63977	3	1	1	1	3	4	5	5	5	22	2
H1558	male	32	130	60	168	75	26.5731	86.3	95.2	0.906513	4.7	1.26	1.05	9.58	2.25968	3	1	1	1	4	5	5	5	5	24	2
H1566	male	60	140	90	172.7	70.5	23.6377	89.5	95	0.942105	4.8	2.67	0.98	13.6	2.61007	3	1	1	1	3	4	4	4	4	19	1
H1574	male	51	148	70	164.7	61.5	22.6719	79.2	89.5	0.884916	5.5	0.99	1.75	12.83	2.55179	3	1	1	1	1	1	1	2	2	7	1
H1584	male	35	120	75	171	78	26.6749	89	97.1	0.916581	4.2	1.42	1.16	8.6	2.15176	3	1	1	1	4	5	5	5	5	24	2
H1585	male	35	124	80	166.6	78	28.1025	93.8	103	0.91068	5.8	1.85	1.05	15.4	2.73437	3	1	1	1	3	3	2	4	2	14	1
H1587	male	30	108	80	167.7	74	26.3127	89.1	97	0.918557	4.1	1.2	1.06	13.5	2.60269	3	1	1	1	4	5	5	5	4	23	2
H1591	male	30	110	70	179.7	70.5	21.832	89.2	97.8	0.912065	4.6	1.42	2	13.67	2.6152	3	1	1	1	4	5	5	5	3	22	2
H1592	male	27	138	96	168.2	87	30.7516	97	103.6	0.936293	5.5	2.41	1.66	11.13	2.40964	3	1	1	1	4	5	5	5	5	24	2
H1595	male	38	110	70	180.5	74.5	22.8666	85.5	97	0.881443	4.8	0.51	1.75	16.53	2.80518	3	1	1	1	3	4	3	4	4	18	1
H1597	male	42	105	70	172.5	71	23.8605	80	90	0.888889	5.3	1.08	1.38	10.7	2.37024	2	1	1	1	3	5	4	4	4	20	1
H1598	male	37	120	70	170.6	57	19.5847	67.3	85.8	0.784382	4.4	1.05	1.28	13.6	2.61007	2	1	1	1	3	4	5	5	4	21	1
H1599	male	55	140	80	165.3	52.5	19.2138	71	85.1	0.834313	4.8	0.39	1.7	11.02	2.39971	2	1	1	1	3	4	4	5	5	21	1
H16	male	26	132	78	165.7	73.5	26.7696	87.5	98	0.892857	5.1	3.43	1.12	12.47	2.52333	2	1	1	1	0	5	4	5	5	19	1
H1600	male	41	120	100	170.2	65	22.4385	76.3	90	0.847778	4.3	0.83	1.96	14.54	2.6769	2	1	1	1	5	5	5	5	5	25	2
H1601	male	47	120	60	169.3	66	23.0266	77	89	0.865169	5	0.38	1.99	11.06	2.40333	2	1	1	1	3	5	5	5	5	23	2
H1604	male	54	126	90	168.1	79	27.9571	90.4	96.7	0.93485	5.3	1.67	1.12	14.04	2.64191	3	2		1	1	1	3	3	3	11	1
H1605	male	47	110	75	164	58.5	21.7504	73.3	86.2	0.850348	5.7	1.53	1.27	8.53	2.14359	3	2		1	1	1	1	1	1	5	1
H1607	male	52	200	120	161.3	67	25.7517	90.2	96	0.939583	4.8	1.91	1.09	14.64	2.68376	3	2		1	2	3	3	3	3	14	1
H1611	male	30	140	90	167	58.5	20.976	73.5	85.3	0.861665	6	0.46	1.51	10.29	2.33117	2	1	1	1	3	5	5	5	5	23	2
H1620	male	59	120	60	167	71.5	25.6373	86.5	95	0.910526	7.1	1.51	1.16	15.14	2.71734	2	1	1	1	2	2	2	2	2	10	1
H1626	male	30	116	70	174.8	85	27.8187	91	103	0.883495	4.6	1.92	1.14	13.55	2.60639	3	1	1	2	3	5	5	4	4	21	1
H1629	male	32	128	80	171	65.5	22.4001	80.1	89	0.9	4.8	1.95	1.05	10.33	2.33505	3	1	1	1	4	4	5	5	4	22	2
H1630	male	35	110	74	172.5	65	21.8442	80.6	90.8	0.887665	4.5	2.69	0.63	9.87	2.2895	3	1	1	2	4	5	5	5	5	24	2
H1634	male	38	130	80	162.5	77	29.1598	91.6	98	0.934694	5.4	3.62	1.06	11.31	2.42569	3	1	1	1	5	5	5	5	4	24	2
H1636	male	53	130	80	166	80	29.0318	93.9	97.6	0.96209	5.6	2.5	1.1	15.88	2.76506	3	2		2	5	5	5	5	5	25	2
H1638	male	37	124	90	170.5	75	25.7996	86	95.9	0.896767	5.2	0.98	1.36	15.56	2.7447	3	1	1	1	4	4	4	4	3	19	1
H1639	male	28	100	70	174	78	25.763	88.5	94.6	0.935518	5.3	1.8	1.03	13.41	2.596	3	1	1	1	5	5	5	5	5	25	2
H1640	male	24	120	84	163.2	78	29.2856	88.5	94.5	0.936508	4.8	1.85	1.21	12.46	2.52252	3	2		1	3	5	4	4	5	21	1
H1641	male	30	98	62	176.3	62	19.9474	74	88	0.840909	4.4	0.69	1.51	12.5	2.52573	3	1	1	1	3	4	4	5	5	21	1
H1642	male	45	122	88	168.5	71	25.0068	84.5	94	0.898936	6.5	3.33	1.4	15.46	2.73826	3	1	1	1	3	5	5	5	5	23	2
H1651	male	40	125	88	175.5	55	17.857	65	86	0.755814	5.6	0.66	1.28	11.62	2.45273	3	1	1	1	3	5	5	5	5	23	2
H1652	male	28	140	90	179.5	61	18.9322	76.2	87.4	0.871854	6	0.7	1.6	11.94	2.47989	3	1	1	1	4	3	3	4	4	18	1
H1655	male	24	110	82	164	48.5	18.0324	69.8	82	0.85122	5.3	0.96	1.41	8.08	2.08939	3	1	2	1	5	5	5	5	5	25	2
H1657	male	34	114	74	167	68	24.3824	86	89	0.966292	4.9	1.94	1.77	15.82	2.76127	3	1	1	1	4	5	5	4	4	22	2
H1658	male	39	120	80	168	75	26.5731	85.1	93.1	0.914071	5.1	0.76	1.06	12.46	2.52252	2	1	1	1	4	4	4	5	4	21	1
H1659	male	30	124	86	162.6	57	21.5593	72.1	87.8	0.821185	4.9	0.96	1.21	15.56	2.7447	2	1	1	1	3	4	4	5	4	20	1
H1660	male	38	120	90	172	58	19.6052	67	85	0.788235	5.5	1.12	1.57	14.86	2.69867	3	1	1	1	3	3	3	5	2	16	1
H1661	male	47	120	80	165.5	73	26.6518	85.7	98	0.87449	7.7	1.39	1.2	14.37	2.66514	3	2		1	3	3	3	5	3	17	1
H1668	male	26	104	72	169.2	59.5	20.7834	74.5	90	0.827778	5.1	0.55	1.5	8.45	2.13417	2	1	1	1	5	5	5	5	5	25	2
H1677	male	23	120	90	167.2	72	25.7549	90	97	0.927835	5.1	1.83	1.5	14.32	2.66166	2	2		1	1	2	2	4	1	10	1
H1680	male	29	110	60	166.9	58	20.8217	69	87	0.793103	5.3	0.49	1.24	15.14	2.71734	3	1	1	2	5	5	5	5	5	25	2
H1681	male	35	118	80	171.2	71	24.2243	91.5	99	0.924242	6.6	1.11	1.46	12.58	2.53211	2	1	1	1	3	4	3	1	3	14	1
H1684	male	25	118	70	159.1	49	19.3578	64.1	82.4	0.777913	5	0.88	1.27	15.13	2.71668	3	1	1	1	4	5	5	5	5	24	2
H1687	male	22	116	72	168	71	25.1559	83	96	0.864583	5.3	0.63	1.34	16.49	2.80275	3	1	1	1	4	5	4	5	4	22	2
H1688	male	27	120	74	164.5	54	19.9555	72	86	0.837209	5.1	1.12	1.53	11.68	2.45788	3	1	1	1	4	4	4	5	5	22	2
H1689	male	30	100	80	158.6	44.5	17.6911	61.2	80	0.765	5.2	0.95	1.89	15.9	2.76632	3	1	1	1	5	0	0	0	0	5	1
H1692	male	31	100	70	175.5	58	18.831	70.2	87	0.806897	5	1.09	1.46	10.4	2.34181	3	1	1	1	4	4	5	5	4	22	2
H1693	male	35	128	70	167.4	71.5	25.515	86.8	95	0.913684	4.8	1.6	0.87	14.58	2.67965	2	2		2	3	4	4	4	4	19	1
H1694	male	39	90	60	163.8	60.5	22.549	75.5	91.3	0.826944	4	0.55	1.63	12.33	2.51204	2	1	1	1	5	5	5	5	5	25	2
H1695	male	41	116	70	169.8	72	24.9722	85.5	94.8	0.901899	5.1	1.28	1.26	9.89	2.29152	2	1	1	1	5	5	5	5	5	25	2
H1699	male	40	120	80	177	69	22.0243	81	88	0.920455	5.4	1.28	1.35	15.15	2.718	3	2		1	3	5	5	5	4	22	2
H1702	male	30	120	80	159.5	53	20.8331	76	82.7	0.918984	5.3	0.99	1.18	11.83	2.47064	3	2		1	4	4	4	5	4	21	1
H1704	male	24	96	62	174	60.5	19.9828	73	87	0.83908	4.4	0.91	1.69	9.84	2.28646	3	1	1	1	5	5	5	5	5	25	2
H1706	male	35	140	90	169.5	70.5	24.5386	79.8	92	0.867391	5	0.78	1.55	16.07	2.77695	2	1	1	1	3	3	3	5	4	18	1
H1707	male	33	120	70	164.7	64	23.5935	80.6	91.7	0.878953	5.3	0.83	1.17	14.98	2.70672	3	1	1	1	3	4	3	4	4	18	1
H1708	male	22	124	86	177.1	75.5	24.0719	80.5	95.6	0.84205	5.1	0.41	1.48	13.01	2.56572	3	2		1	3	3	3	5	4	18	1
H1713	male	36	110	70	166.5	82.5	29.7595	97.7	100	0.977	5.8	1.88	1.01	11.86	2.47317	2	1	1	1	3	5	3	5	4	20	1
H1716	male	33	128	78	182.1	74	22.3158	81	97	0.835052	4.8	1.27	1.19	9.97	2.29958	3	1	1	1	3	4	4	5	4	20	1
H1718	male	24	102	64	171	58.5	20.0062	68	88	0.772727	5.1	0.98	1.23	12.25	2.50553	3	1	1	2	4	5	5	5	5	24	2
H1721	male	26	100	70	169	59	20.6575	74.5	84.6	0.880615	5.1	0.74	1.4	13.23	2.58249	2	2		1	4	2	4	5	4	19	1
H1722	male	37	100	70	162	59	22.4813	77.5	90	0.861111	5.2	0.93	1.37	14.76	2.69192	2	1	2	2	3	4	4	5	5	21	1
H1728	male	25	130	80	170.1	72.5	25.057	81.5	94	0.867021	5.5	2.69	1.02	13.24	2.58324	3	2		1	3	3	3	3	3	15	1
H1729	male	24	120	80	179.6	66.5	20.6162	85.2	85	1.00235	4.6	0.92	1.42	10.49	2.35042	3	2		1	5	0	0	0	0	5	1
H173	male	39	100	65	181.6	78	23.6517	89.8	99	0.907071	6.4	1.06	1.65	13.94	2.63476	3	1	1	1	5	5	5	5	5	25	2
H1730	male	42	100	80	170.5	60.5	20.8117	79.2	86.1	0.919861	4.6	0.52	2.32	12.44	2.52092	3	1	1	1	3	4	5	5	5	22	2
H1733	male	29	126	72	168	50.5	17.8926	66.5	75.5	0.880795	4.9	0.68	1.44	14.14	2.64901	3	1	1	1	5	0	0	0	0	5	1
H1735	male	37	126	72	170	65.5	22.6644	84.2	91	0.925275	5.7	2.14	1.29	13.28	2.58626	3	1	1	1	4	5	5	5	5	24	2
H1736	male	41	126	76	166	62.5	22.6811	78	89	0.876404	5.5	2.33	1.22	13.55	2.60639	3	1	1	2	5	5	5	5	5	25	2
H1742	male	40	90	66	167.6	58	20.6481	72.8	82.3	0.884569	5.5	0.75	1.15	14.91	2.70203	2	1	1	1	1	3	3	3	1	11	1
H1747	male	25	110	70	164	64	23.7954	80.5	92.4	0.871212	5.4	1.2	1.1	13.1	2.57261	3	1	2	1	3	4	4	5	4	20	1
H1748	male	32	118	78	175.5	64	20.7791	71.2	88.5	0.80452	4.6	0.64	1.94	14.97	2.70605	3	2		1	3	5	4	5	5	22	2
H1749	male	45	126	78	161.5	70.5	27.0299	88.5	94.8	0.933544	5.4	1	1.46	12.44	2.52092	2	1	1	1	3	5	1	2	1	12	1
H1751	male	35	120	88	178	66	20.8307	78	91	0.857143	5.4	0.53	1.39	12.42	2.51931	3	2		1	4	4	4	5	4	21	1
H1752	male	34	128	88	163	68.5	25.7819	88	92	0.956522	4.7	1.65	1.89	10.15	2.31747	3	1	1	1	3	3	4	5	4	19	1
H1755	male	28	126	72	169	58.5	20.4825	75.5	87.9	0.858931	5.4	0.78	1.57	14.17	2.65113	3	2		1	4	5	5	5	4	23	2
H1756	male	26	110	80	170.1	78	26.9579	91.6	92.8	0.987069	4.9	4.97	0.95	13.18	2.5787	3	1	1	1	5	5	5	5	5	25	2
H1758	male	36	110	80	167	54	19.3625	70.5	84	0.839286	5.6	1.04	1.83	10.81	2.38047	2	2		1	3	3	3	3	3	15	1
H1759	male	21	130	90	166	77	27.9431	87.5	97.1	0.901133	5.3	1.14	1.48	11.01	2.3988	3	1	1	1	5	5	5	5	4	24	2
H176	male	41	122	80	174.5	70	22.9883	81	91	0.89011	5.3	1.67	1.09	14.25	2.65676	3	2		1	5	5	5	5	5	25	2
H1760	male	22	90	60	165.1	53.5	19.6273	67.1	84	0.79881	5.3	0.58	1.49	15.7	2.75366	2	1	1	1	0	0	0	5	5	10	1
H1765	male	36	130	80	162.8	65	24.5247	80	89.4	0.894855	5.1	0.6	1.7	13.75	2.62104	3	2		1	5	5	5	5	5	25	2
H1768	male	23	130	80	179.5	80	24.8291	87	97.6	0.891393	5.6	0.7	1.46	12.05	2.48906	3	1	1	1	3	5	5	5	4	22	2
H1769	male	25	120	80	169.5	63	21.9281	81.4	89.5	0.909497	5.3	0.82	1.86	13.15	2.57642	2	2		1	3	3	3	5	2	16	1
H1772	male	43	118	78	163.1	72.5	27.254	89.2	97	0.919588	5.1	0.67	1.4	15.52	2.74213	3	2		1	5	5	5	5	5	25	2
H1773	male	42	100	70	173.7	64	21.2119	74.2	92	0.806522	4.9	0.93	1.6	14.03	2.6412	2	1	1	1	5	5	5	5	5	25	2
H1777	male	23	124	70	173.6	68.5	22.7296	80.1	89.3	0.896976	4.7	1.37	1.23	14.11	2.64688	3	1	1	1	4	5	5	5	5	24	2
H1781	male	25	104	70	162.2	49	18.6249	66	83.5	0.790419	5.4	0.49	1.44	13.09	2.57185	3	2		1	4	5	5	5	4	23	2
H1782	male	28	100	68	168.9	47	16.4755	61	82	0.743902	4.8	1.24	1.35	10.38	2.33988	3	1	1	1	4	4	4	4	4	20	1
H1784	male	35	100	80	165.5	75	27.382	96.5	95	1.01579	5.2	1.49	1.14	13.34	2.59077	3	1	1	1	2	4	5	5	2	18	1
H1786	male	31	104	76	172.5	70	23.5245	85.6	93	0.92043	5.9	0.85	1.25	15.9	2.76632	2	1	1	2	3	4	4	5	3	19	1
H1787	male	40	120	90	164.5	57.5	21.2489	77	86.2	0.893271	4.8	0.83	1.48	14.51	2.67484	2	2		1	3	5	5	5	4	22	2
H1789	male	31	150	96	169.1	66	23.0811	80	90.2	0.886918	5.2	1.79	1.07	14.61	2.68171	3	2		1	5	5	5	5	5	25	2
H1790	male	30	110	70	165.2	56.5	20.7028	77.2	90.1	0.856826	5.5	1.35	1.62	12.91	2.558	3	2		1	3	4	4	5	5	21	1
H1792	male	29	114	76	168.1	74.5	26.3646	84.3	96.4	0.874481	4.7	0.97	1.94	16.05	2.77571	3	2		1	5	5	5	5	5	25	2
H1793	male	37	104	80	165.5	57.5	20.9929	74.9	87.7	0.854048	4.6	1.11	1.3	13.57	2.60786	3	1	1	1	3	5	5	5	5	23	2
H1796	male	27	130	80	167.8	49.5	17.5801	64.6	84.3	0.766311	5.5	1.56	1.39	9.8	2.28238	3	1	1	1	5	5	5	5	5	25	2
H1802	male	26	110	90	163.5	45.5	17.0206	62.7	78.2	0.80179	5.1	0.45	1.52	15.58	2.74599	3	2		1	4	5	5	5	4	23	2
H1806	male	31	104	80	166	67	24.3141	84.2	91.1	0.924259	5.2	1.99	0.93	11.35	2.42922	2	1	1	1	4	4	4	5	4	21	1
H1809	male	28	108	80	173	60.5	20.2145	76.2	87	0.875862	5.1	1.01	1.41	13.83	2.62684	3	2		2	5	5	5	5	5	25	2
H181	male	38	130	80	176	74.5	24.0509	79.5	101	0.787129	5	0.24	1.68	10.57	2.35802	3	2		1	3	4	5	5	5	22	2
H1810	male	22	110	84	168	51	18.0697	72.5	83	0.873494	4.8	1.03	1.2	12.38	2.51608	3	1	1	1	4	5	5	5	5	24	2
H1812	male	29	114	88	175.5	89	28.8959	99	100.4	0.986056	4.9	2.67	1.17	13.31	2.58852	3	1	1	1	4	5	4	5	4	22	2
H1815	male	39	90	60	169.2	55	19.2115	71	82	0.865854	5.3	1.31	1.85	16.58	2.8082	3	1	1	1	4	5	5	5	5	24	2
H1816	male	32	130	70	177	61	19.4708	74	90.6	0.816777	5.6	1.32	1.32	15.65	2.75047	3	1	1	1	4	5	4	5	2	20	1
H182	male	39	144	100	164.6	72.5	26.7595	86.5	96.5	0.896373	4.4	0.83	1.44	10.49	2.35042	3	2		1	3	4	4	5	3	19	1
H1824	male	33	110	80	169	64.5	22.5832	82.5	91.8	0.898693	5.3	1.13	1.57	10.01	2.30358	3	1	1	1	5	5	5	5	5	25	2
H1827	male	32	124	80	175.5	65	21.1037	81.2	90	0.902222	4.9	1.14	1.61	14.86	2.69867	3	1	1	1	5	5	5	5	4	24	2
H1828	male	22	120	80	175.6	57.5	18.6474	69	84	0.821429	4.9	0.61	1.3	15.58	2.74599	3	2		1	5	5	5	5	5	25	2
H1829	male	27	114	76	166	57	20.6852	72.5	84.7	0.855962	5.5	0.89	1.35	13.37	2.59301	3	2		1	4	5	5	5	4	23	2
H1832	male	27	92	70	173.1	62	20.6918	76	87.7	0.866591	4.5	1.35	1.72	12.63	2.53607	3	1	1	1	3	4	5	5	5	22	2
H1839	male	24	110	80	169	64	22.4082	74.2	91.3	0.812705	5.6	1.14	1.56	16.22	2.78625	3	2		1	3	5	5	5	3	21	1
H1843	male	35	100	80	167.5	72.5	25.8409	85.3	95	0.897895	5.1	3.82	0.95	12.17	2.49897	3	2		2	4	5	4	5	5	23	2
H1844	male	29	120	80	166.1	50.5	18.3043	68.5	79	0.867089	5.5	0.8	1.4	10.27	2.32923	2	1	1	1	5	4	4	5	4	22	2
H1847	male	21	90	70	164.7	61.5	22.6719	69.8	96.1	0.726327	3	0.86	1.41	12.09	2.49238	3	1	1	1	1	4	3	1	1	10	1
H1850	male	28	110	84	161.5	60.5	23.1959	79.1	90	0.878889	4.3	2.04	1.07	11.11	2.40785	3	1	1	1	4	5	5	5	5	24	2
H1853	male	32	100	60	171.8	52	17.618	71.2	80.2	0.887781	4.7	0.83	1.55	14.31	2.66096	3	1	1	1	4	5	5	5	5	24	2
H1855	male	36	108	82	162.1	76.5	29.1136	94.6	98	0.965306	4.7	1.42	1.09	15.2	2.7213	3	1	1	1	4	5	5	4	5	23	2
H1856	male	34	120	84	171.7	61.5	20.861	74.6	93	0.802151	5.1	0.54	1.26	11.98	2.48324	3	1	1	1	5	5	5	5	4	24	2
H1857	male	21	110	70	170	81.5	28.2007	88	102.5	0.858537	4.7	0.45	1.25	12.56	2.53052	3	1	1	1	4	4	4	4	2	18	1
H1858	male	33	120	70	172.1	56.5	19.076	68.2	83	0.821687	4.3	1.66	2.16	11.54	2.44582	3	2		1	5	5	5	5	5	25	2
H1860	male	34	124	80	176.5	69	22.1493	80	90.3	0.885936	4	1.51	1.19	8.68	2.16102	3	1	1	1	4	4	5	5	4	22	2
H1865	male	23	120	80	165.5	72.5	26.4693	92	88.5	1.03955	4.7	1.61	1.3	13.74	2.62031	3	1	1	1	4	5	5	5	4	23	2
H1868	male	25	140	84	176	84.5	27.2792	92.2	102.8	0.896887	6.8	1.74	1.12	15.85	2.76317	3	1	1	1	3	4	4	5	3	19	1
H1870	male	26	94	70	162.2	66.5	25.2767	81	96.2	0.841996	4.8	0.43	1.31	13.02	2.56649	3	2		1	4	4	4	5	4	21	1
H1873	male	33	100	70	165	60	22.0386	78	93	0.83871	5.3	2.05	1.22	15.24	2.72392	3	2		1	4	4	4	5	5	22	2
H1875	male	36	126	90	170.5	64	22.0156	78.2	89	0.878652	4.8	2.81	1.09	14.76	2.69192	3	2		1	1	2	1	4	0	8	1
H1878	male	30	104	84	167.2	70	25.0395	86	97.5	0.882051	4.8	0.9	1.38	12.38	2.51608	3	2		1	5	4	4	5	4	22	2
H1882	male	25	144	88	167	55	19.721	67.5	84.5	0.798817	5	1.9	1.72	13.54	2.60565	3	1	1	1	4	4	3	5	4	20	1
H1883	male	35	110	74	160.2	66	25.7169	81.6	89.3	0.913774	5.2	1.91	1.05	15.7	2.75366	3	1	1	2	5	5	5	5	4	24	2
H1886	male	31	112	78	162.4	50.5	19.1478	72	86	0.837209	4.4	0.8	1.43	11.09	2.40604	3	2		2	5	5	5	5	5	25	2
H1887	male	25	112	80	174.1	62	20.4547	70.6	91.6	0.770742	5.2	0.8	1.4	13.51	2.60343	3	1	1	1	3	4	4	5	4	20	1
H1889	male	29	110	80	171	68	23.255	81.1	94.2	0.860934	4.6	1.07	1.56	11.72	2.4613	3	1	1	1	4	3	0	0	0	7	1
H1891	male	34	100	60	160.8	77.5	29.973	93.1	100.2	0.929142	4.8	2.59	1.15	14.32	2.66166	3	1	1	1	5	5	5	5	5	25	2
H1902	male	28	114	64	168.2	55	19.4406	68.1	87.7	0.776511	5	3.3	1.01	12.29	2.50879	2	1	1	1	4	5	5	5	4	23	2
H1905	male	28	138	80	162.6	62	23.4504	76.2	90.1	0.845727	5.5	3.81	1.19	11.7	2.45959	3	1	1	1	3	5	5	5	4	22	2
H1907	male	31	110	82	165.4	58.5	21.3838	76.8	87.4	0.878719	4.8	1.58	1.36	11.03	2.40062	3	1	1	1	3	5	5	5	4	22	2
H1908	male	27	124	80	172.7	59	19.7819	73.5	88.8	0.827703	5.6	1.23	1.45	11.85	2.47233	2	2		1	4	5	5	5	3	22	2
H1909	male	35	128	64	172	65.5	22.1403	74	89	0.831461	4.7	0.63	1.57	14.27	2.65816	2	1	1	2	3	4	5	5	4	21	1
H1911	male	41	140	90	163.2	72	27.0329	88	96	0.916667	4.9	2.68	1.04	10.64	2.36462	2	1	1	1	3	4	3	5	4	19	1
H1912	male	38	110	78	168	64	22.6757	84	91.5	0.918033	4.9	1.04	1.32	15.77	2.75811	3	2		2	3	4	5	5	5	22	2
H1917	male	24	110	70	168.3	55.5	19.5941	72.3	84	0.860714	4.6	0.71	0.99	10.25	2.32728	3	2		1	4	3	3	5	4	19	1
H192	male	46	110	70	174.3	73.5	24.1932	91.2	97.2	0.938272	5.7	3.01	1.58	12.06	2.48989	3	1	1	1	3	5	5	5	5	23	2
H1927	male	21	130	92	174.4	67	22.0283	83.8	94.5	0.886772	5.4	0.5	1.55	11.67	2.45702	3	1	1	1	5	4	4	5	4	22	2
H1928	male	30	100	70	168.1	75	26.5415	83.7	93.5	0.895187	5.6	1.28	1.27	15.23	2.72327	3	1	1	1	4	5	5	5	5	24	2
H1932	male	25	108	70	172	68	22.9854	71	91.5	0.775956	4.7	1.11	1.08	14.71	2.68853	3	1	1	1	4	5	5	5	4	23	2
H1933	male	27	112	80	172	57	19.2672	70.5	85.5	0.824561	5.1	0.4	1.51	13.11	2.57338	3	1	1	1	3	4	4	5	4	20	1
H1944	male	29	110	60	173	65	21.7181	77.4	90	0.86	5.2	0.75	1.78	12.31	2.51041	3	2		1	3	5	5	5	2	20	1
H1948	male	29	126	80	163.6	71	26.5272	84.6	92	0.919565	5.3	1.48	1.21	13.16	2.57718	3	2		1	5	5	5	5	5	25	2
H195	male	27	98	60	164.5	53	19.5859	65.2	86.9	0.750288	4.4	0.83	1.06	13.38	2.59376	3	2		1	5	4	5	5	5	24	2
H1950	male	30	106	80	172.5	74	24.8687	84.6	97	0.872165	4	1.2	1.34	14.43	2.66931	3	1	1	1	4	2	2	5	4	17	1
H1953	male	30	120	86	170	72.5	25.0865	85.3	93.7	0.910352	4.7	0.59	0.9	15.28	2.72654	3	2		1	4	5	5	5	5	24	2
H1956	male	44	110	80	174.3	86.5	28.4722	99.1	99	1.00101	4.6	1.86	0.79	14.37	2.66514	2	1	1	1	2	4	4	5	4	19	1
H1957	male	39	120	80	172.5	69.5	23.3564	86	93.5	0.919786	4.7	1	1.91	13.48	2.60121	3	2		1	4	5	5	5	5	24	2
H196	male	45	124	80	167.1	57	20.4137	73.6	86.5	0.850867	5.2	10.07	1.74	9.61	2.2628	3	1	1	1	3	4	5	4	4	20	1
H1960	male	34	110	70	166.5	64	23.0861	87.2	91.8	0.949891	4.4	0.9	1.22	9.96	2.29858	3	1	1	1	5	5	5	5	5	25	2
H1961	male	32	130	80	166.3	64	23.1417	75	91.8	0.816993	6	3.15	1.26	10.85	2.38417	3	1	1	1	3	4	4	5	4	20	1
H1964	male	28	120	90	163.5	72	26.9338	87.5	96	0.911458	4.5	0.65	1.63	14.26	2.65746	3	2		1	3	5	5	5	3	21	1
H1965	male	30	100	64	165.1	58.5	21.4616	78	86	0.906977	4.6	0.96	1.18	11.75	2.46385	2	2		1	5	5	5	5	5	25	2
H1966	male	31	124	80	167	64.5	23.1274	76.8	91.5	0.839344	5	1.39	1.03	13.14	2.57566	3	1	1	1	5	5	5	5	5	25	2
H1967	male	25	120	86	166	55	19.9594	69	81.5	0.846626	4.8	0.74	0.99	10.32	2.33408	3	1	1	1	3	2	4	2	4	15	1
H1976	male	27	100	84	175.5	63	20.4544	78.6	89	0.883146	4.5	1.32	1.25	11.21	2.41681	3	1	1	1	3	3	4	5	5	20	1
H1980	male	20	116	80	165.5	50	18.2547	68.5	84.2	0.813539	5.4	0.39	1.59	12.97	2.56264	3	2		1	5	0	0	0	0	5	1
H1981	male	26	110	70	172.4	56	18.8414	72	84	0.857143	5.2	1.43	1.77	14.9	2.70136	3	2		1	4	3	4	5	4	20	1
H1982	male	27	104	68	175.5	68.5	22.2401	78	90.1	0.865705	4.6	2.54	1.17	14	2.63906	3	2		1	5	5	5	5	4	24	2
H1983	male	25	100	80	171.9	59.5	20.1356	75.2	86.2	0.87239	5.6	1.48	1.27	9.26	2.2257	3	2		1	5	5	5	5	5	25	2
H1984	male	36	120	90	157.5	58	23.3812	76	88.4	0.859729	5.1	0.98	1.64	12.69	2.54081	3	2		1	3	5	5	5	5	23	2
H1986	male	35	134	90	165	69	25.3444	85	93.2	0.912017	4.6	1.9	1.34	15.8	2.76001	3	1	1	1	4	4	2	5	4	19	1
H1988	male	29	120	80	165	52.5	19.2837	67.4	83	0.812048	5.7	0.64	1.69	13.58	2.6086	3	2		1	2	3	4	4	3	16	1
H1997	male	30	110	80	170.5	91.5	31.4755	100	100.2	0.998004	4.5	0.76	1.33	12.2	2.50144	3	2		1	3	4	4	5	5	21	1
H1998	male	36	90	70	169	57	19.9573	67.5	84.5	0.798817	4.7	0.35	1.29	14.17	2.65113	1	1	1	1	3	4	5	5	4	21	1
H1999	male	22	94	70	177	54.5	17.396	66.5	81.5	0.815951	5.5	0.78	1.13	13.43	2.59749	3	1	1	1	5	0	0	0	0	5	1
H2002	male	36	130	80	171	80.5	27.5298	95.5	102.5	0.931707	5.1	1.95	1.16	14.26	2.65746	3	2		1	3	4	4	5	4	20	1
H2003	male	22	124	88	172.3	63	21.2212	77.5	89.7	0.863991	4.8	0.7	1.41	11.71	2.46044	2	1	1	1	4	5	5	5	4	23	2
H2005	male	22	130	80	184.3	67.5	19.8725	78.4	92	0.852174	4.8	0.84	1.38	15.16	2.71866	3	1	1	1	3	3	3	3	3	15	1
H2008	male	23	110	76	164.6	52	19.193	66	84.5	0.781065	5.5	0.67	1.21	13.03	2.56725	3	2		1	3	3	3	3	2	14	1
H201	male	37	120	80	169.1	67.5	23.6057	81	91	0.89011	5.1	0.6	1.57	15.69	2.75302	3	2		1	3	5	5	5	4	22	2
H2010	male	47	98	70	167.2	65.5	23.4298	87	89	0.977528	6.2	5.41	1.05	11.83	2.47064	3	1	1	1	3	4	4	5	4	20	1
H2011	male	24	100	66	171.2	56.5	19.2771	72	81.4	0.884521	5	1.17	1.07	11.67	2.45702	3	1	1	1	5	0	0	0	0	5	1
H2012	male	36	100	64	168	68.5	24.2701	84.3	93	0.906452	4.4	1.74	1.23	14.48	2.67277	3	2		1	4	2	2	5	5	18	1
H2013	male	34	110	70	165.5	56.5	20.6278	74.4	88.5	0.840678	5	0.92	1.22	11.4	2.43361	3	1	1	1	3	5	5	5	5	23	2
H2014	male	46	110	70	160	49	19.1406	69	81	0.851852	4.6	1.34	1.04	15.52	2.74213	3	1	1	1	3	4	4	5	4	20	1
H2015	male	28	94	66	178.2	62	19.5243	74.2	88	0.843182	5	1.01	1.46	12.61	2.53449	3	1	1	1	4	5	5	5	4	23	2
H2016	male	31	98	60	174.1	78	25.7334	89	97.5	0.912821	5.1	1.22	1	11.8	2.4681	3	1	1	1	4	5	5	5	4	23	2
H2017	male	22	100	60	174	64	21.1389	76.3	88	0.867045	4.3	0.95	1.41	12.84	2.55257	3	1	1	1	4	5	5	5	4	23	2
H2018	male	28	100	80	172.6	59.5	19.9726	77	87.4	0.881007	4.7	1.8	1.41	13.91	2.63261	3	1	1	1	4	5	5	5	4	23	2
H2020	male	26	110	84	172.5	60	20.1638	77.8	89.5	0.869274	5.2	0.87	1.48	13.84	2.62756	3	2		1	4	4	4	5	4	21	1
H2044	male	23	110	76	175.5	78	25.3245	85	97.2	0.874486	4.3	1.34	1.25	13.58	2.6086	3	1	1	2	4	2	4	5	4	19	1
H2048	male	33	132	88	165.5	77	28.1122	94	95.6	0.983264	4.2	1.62	1.27	13.33	2.59002	3	1	1	1	4	5	5	5	4	23	2
H2051	male	38	110	70	193.1	73	19.5775	88	90.5	0.972376	9.4	1.33	1.45	15.92	2.76758	3	1	1	1	3	4	4	5	4	20	1
H2052	male	21	120	84	182.5	68	20.4166	78.7	90.2	0.872506	5.1	0.74	1.28	11.99	2.48407	3	1	1	1	4	2	2	0	0	8	1
H2054	male	36	120	84	170.5	78	26.8316	92.5	93	0.994624	5.2	1.28	1.27	9.61	2.2628	3	1	1	1	5	5	5	5	5	25	2
H2056	male	40	120	64	163.6	53.5	19.9888	71	86.1	0.824623	4.9	1.21	1.62	12.42	2.51931	2	2		1	5	5	5	5	5	25	2
H208	male	30	100	80	169.5	65.5	22.7983	73.1	92.5	0.79027	5.5	0.49	1.58	13.25	2.584	3	1	1	1	5	5	5	5	4	24	2
H2099	male	29	120	86	164.1	64.5	23.952	80.3	92.5	0.868108	5.4	1.11	1.3	14.47	2.67208	3	2		1	5	5	5	5	5	25	2
H2102	male	47	138	80	167.2	86.5	30.9417	98.6	103.8	0.949904	4.6	2.12	1.07	12.89	2.55645	2	1	1	1	3	5	5	5	5	23	2
H2104	male	33	118	86	168.6	52	18.2931	70	83	0.843373	5.4	1.32	1.59	13.3	2.58776	2	2		1	5	5	5	5	5	25	2
H2105	male	34	130	90	168.5	66.5	23.4219	85.1	91.2	0.933114	6.3	2.48	1.58	13.22	2.58173	3	1	1	1	3	4	5	5	5	22	2
H211	male	56	100	70	163.8	60	22.3627	77.6	92	0.843478	5.5	1.63	1.35	11.13	2.40964	3	1	1	1	4	5	5	5	5	24	2
H2111	male	30	130	90	170	78	26.9896	86	98.4	0.873984	4.8	2.59	1	16.21	2.78563	3	1	1	1	4	2	2	5	4	17	1
H2113	male	23	120	88	168	56.5	20.0184	72.1	86.5	0.833526	5.6	2.03	1.28	13.65	2.61374	3	1	1	1	4	5	5	5	5	24	2
H2114	male	32	110	70	170.6	59	20.2719	75	84	0.892857	5	0.95	1.47	12.32	2.51122	3	1	1	1	3	4	4	5	5	21	1
H2117	male	30	110	90	162.2	62.5	23.7563	85	89.2	0.952915	5.4	0.79	1.59	9.25	2.22462	3	2		1	3	2	2	4	4	15	1
H2121	male	33	128	80	174	83.5	27.5796	98	98	1	5.2	1.15	1.23	9.65	2.26696	3	1	1	1	3	4	4	4	4	19	1
H2124	male	32	130	86	174.2	63	20.7608	75	92	0.815217	4.8	1.25	1.6	10.6	2.36085	3	1	1	1	4	4	5	5	4	22	2
H2129	male	57	104	80	160.4	56.5	21.9604	79.5	88.6	0.897291	5.2	1.41	1.14	9.23	2.22246	3	1	1	1	3	3	4	5	5	20	1
H2136	male	24	110	80	161	50.5	19.4823	64.5	81.8	0.788509	5.3	0.58	1.23	8.54	2.14476	3	1	1	1	3	0	4	5	2	14	1
H2138	male	30	112	76	167	72	25.8166	88	97.2	0.90535	4.9	2.01	1.09	10.39	2.34084	3	1	1	1	4	3	3	5	4	19	1
H2139	male	25	116	80	172.6	84.5	28.3645	91.5	100	0.915	5.5	2.58	1.14	11.05	2.40243	3	1	1	2	4	5	5	5	5	24	2
H2140	male	26	90	60	168.5	62	21.8369	74.5	88.5	0.841808	5	1.19	1.23	11.64	2.45445	3	2		1	4	5	5	5	4	23	2
H2141	male	30	106	70	157.5	53	21.3656	74.4	82.9	0.897467	4.8	0.5	1.48	13.46	2.59972	3	2		1	4	4	4	4	4	20	1
H2144	male	40	124	84	171.6	87	29.545	95	103	0.92233	10.6	1.48	2.22	10.05	2.30757	3	1	1	1	0	1	1	5	4	11	1
H2164	male	39	100	60	179.5	72.5	22.5014	88.5	94.2	0.93949	5.3	2.21	1.04	7.4	2.00148	3	1	1	1	4	5	5	5	4	23	2
H2165	male	49	140	94	170.5	71.5	24.5956	84	90.5	0.928177	5.5	1.73	1.4	13.04	2.56802	3	2		1	3	5	5	5	5	23	2
H220	male	31	140	80	164	69	25.6544	85.6	94	0.910638	6	4.21	1.61	15.75	2.75684	3	2		1	3	3	3	4	3	16	1
H223	male	25	100	68	169	69	24.1588	84	100	0.84	6	1.31	2.1	11.99	2.48407	3	1	1	1	3	2	3	5	2	15	1
H226	male	33	110	90	163.2	69.5	26.0942	87.7	95.6	0.917364	5.5	11.25	2.1	11.9	2.47654	3	2		1	4	5	5	5	5	24	2
H2289	male	37	180	120	174	87	28.7356	98.6	96	1.02708	9.6	6.13	0.83	13.53	2.60491	3	2		1	3	4	5	5	5	22	2
H244	male	60	136	80	162.1	65	24.737	84.3	89	0.947191	7.3	3.45	0.84	13.4	2.59525	2	2		2	2	2	3	3	3	13	1
H246	male	67	160	92	167	65	23.3067	87	91.5	0.95082	5.6	0.84	1.28	15.71	2.7543	2	2		2	2	2	3	2	2	11	1
H248	male	22	110	80	169.2	74.5	26.0229	86.5	93.4	0.926124	5	0.64	1.48	12.98	2.56341	3	1	1	1	5	0	0	5	5	15	1
H250	male	62	130	80	167.5	68	24.237	87.5	91.2	0.95943	5.3	0.72	1.63	14.94	2.70404	1	2		1	3	2	2	3	3	13	1
H263	male	44	100	76	183.5	64.5	19.1552	75.8	87.5	0.866286	5.4	0.68	1.5	15.65	2.75047	2	2		1	3	4	4	5	4	20	1
H265	male	31	100	70	161.6	59.5	22.7842	79.7	91	0.875824	4.6	1.73	1.27	14.43	2.66931	3	1	1	1	3	3	3	5	5	19	1
H270	male	47	140	80	171.2	93	31.7304	95.3	109	0.874312	6.1	1.31	1.62	13.75	2.62104	3	2		1	3	4	4	5	5	21	1
H278	male	38	136	80	165.1	63.5	23.2959	84.3	90	0.936667	4.9	2.04	1.05	9.69	2.27109	3	1	1	1	4	5	5	5	4	23	2
H280	male	37	130	86	168	67.5	23.9158	80	93.5	0.855615	5	1.37	1.48	11.7	2.45959	3	2		1	4	4	5	5	5	23	2
H283	male	35	130	98	171.5	65.5	22.2696	85.5	92	0.929348	5.1	2.12	1.14	11.72	2.4613	3	1	1	1	5	5	5	5	5	25	2
H287	male	40	108	70	165.5	67.5	24.6438	87	94	0.925532	5.3	2.23	1.27	12.5	2.52573	3	1	1	1	3	5	4	5	4	21	1
H290	male	29	120	70	159.2	45	17.7552	63.5	81.2	0.78202	4.8	1.08	1.35	14.3	2.66026	3	1	1	1	3	5	5	5	5	23	2
H292	male	38	120	80	164.4	74.5	27.5647	88.4	99	0.892929	5	1.15	1.84	14.58	2.67965	3	1	2	1	3	4	4	4	4	19	1
H294	male	33	110	80	163	67	25.2174	85.6	91.8	0.932462	5.7	0.81	1.46	13.58	2.6086	3	2		1	4	4	5	5	5	23	2
H3	male	47	120	70	163.8	63.5	23.6671	86	93	0.924731	5.4	0.68	1.27	15.42	2.73567	3	1	1	1	3	4	4	4	4	19	1
H300	male	36	120	78	169.5	57	19.8397	70.2	88.8	0.790541	5.3	0.32	1.76	14.72	2.68921	3	2		1	5	5	4	5	5	24	2
H306	male	32	126	78	165.2	53	19.4203	79.8	90.8	0.878855	5	1.23	1.21	14.03	2.6412	3	2		1	4	4	4	4	4	20	1
H320	male	47	130	90	171.3	65	22.1513	83.7	91.8	0.911765	5	1.48	1.44	9.56	2.25759	3	2		1	3	3	3	5	3	17	1
H324	male	45	162	110	165.5	60.5	22.0882	87.5	89	0.983146	5.2	1.11	1.83	7.93	2.07065	3	1	1	2	4	5	5	5	4	23	2
H325	male	27	130	70	166.5	89	32.1042	94.2	104.4	0.902299	5.3	1.5	1.06	11.85	2.47233	3	1	1	1	3	2	2	4	3	14	1
H330	male	25	120	70	164.3	69	25.5608	85	99.8	0.851703	4.5	0.81	1.16	13.51	2.60343	3	2		1	5	0	0	0	0	5	1
H332	male	25	110	80	167.5	68	24.237	79.8	95.1	0.839117	4.1	2.38	1.07	12.38	2.51608	3	1	1	1	5	5	5	5	4	24	2
H339	male	35	100	60	163.8	60	22.3627	77.8	90.8	0.856828	5.1	3.69	0.86	14.14	2.64901	3	2		1	5	5	0	5	5	20	1
H342	male	30	120	80	168	48	17.0068	66.3	82	0.808537	5.2	0.97	1.94	11.55	2.44669	3	1	1	1	4	5	5	5	5	24	2
H354	male	44	124	70	166.2	72.5	26.2468	93.2	97	0.960825	4.7	1.19	1.15	14	2.63906	3	2		2	3	4	4	5	4	20	1
H355	male	42	100	70	173	58.5	19.5463	73	91.5	0.797814	4.3	0.64	1.58	12.11	2.49403	3	1	1	1	3	0	4	5	4	16	1
H357	male	26	138	80	168.8	86	30.1824	88	101.8	0.86444	4.9	0.91	1.24	15.31	2.72851	3	1	1	1	4	4	4	5	4	21	1
H365	male	64	150	90	170.2	63.5	21.9207	78.5	91	0.862637	5.5	1.44	1.42	10.98	2.39608	3	1	1	2	3	2	2	4	3	14	1
H370	male	36	126	80	176.7	81	25.9425	92.6	100.5	0.921393	5.1	1.97	1.1	12.76	2.54632	3	2		1	5	5	2	5	3	20	1
H373	male	32	110	70	170.3	58.5	20.171	71.8	88.8	0.808559	4.9	0.55	1.85	9.52	2.25339	3	2		1	5	5	5	5	4	24	2
H374	male	33	124	80	166.3	72	26.0344	85.7	96.5	0.888083	4.7	1.19	1.2	9.5	2.25129	3	2		1	4	5	4	5	4	22	2
H375	male	26	110	70	171	56.5	19.3222	76	89	0.853933	4.7	0.64	1.61	14.65	2.68444	3	2		1	5	5	5	5	5	25	2
H376	male	25	110	70	174	85	28.075	87.2	103	0.846602	4.8	2.32	0.89	12.63	2.53607	3	1	1	1	3	4	5	5	5	22	2
H377	male	25	100	70	164	61	22.68	83.7	94.5	0.885714	4.9	0.91	1.1	9.12	2.21047	3	1	1	1	5	5	5	5	4	24	2
H378	male	25	102	60	163	63	23.7118	78.3	91	0.86044	5.1	0.95	1.23	13.79	2.62394	3	2		1	5	5	5	5	5	25	2
H380	male	28	130	90	167.5	86	30.6527	100.8	99.8	1.01002	5.7	18.49	3.67	10.5	2.35138	3	1	1	1	5	5	5	5	5	25	2
H382	male	22	100	60	170	56	19.3772	70	87.5	0.8	4.5	0.66	1.14	13.44	2.59824	3	1	1	2	3	2	2	3	2	12	1
H383	male	25	140	90	175.5	64.5	20.9414	76.9	91.8	0.837691	5	0.63	1.14	16.11	2.77944	3	2		1	5	5	5	5	5	25	2
H385	male	25	96	70	180.3	85	26.1473	99	102.3	0.967742	4.8	1.01	1.16	10.74	2.37398	3	2		1	4	5	5	5	4	23	2
H388	male	53	130	70	172.7	65	21.7936	82.6	88.5	0.933333	5.8	0.44	1.49	9.12	2.21047	3	2		1	3	5	5	5	5	23	2
H392	male	28	120	70	165.5	65	23.7311	81	93.2	0.869099	5.1	0.67	1.53	13.18	2.5787	3	2		1	4	5	5	5	4	23	2
H393	male	28	110	70	158	65.5	26.2378	86.7	94	0.92234	4.6	1.05	1.47	7.36	1.99606	3	1	1	1	5	5	5	5	5	25	2
H396	male	55	104	70	173	79	26.3958	92.8	100.7	0.921549	6	2.08	0.96	14.05	2.64262	3	2		1	4	5	5	5	5	24	2
H398	male	25	120	80	163	65	24.4646	80.8	83.5	0.967665	5.1	1.96	1.35	13.53	2.60491	3	2		1	5	5	5	5	5	25	2
H404	male	31	106	70	173.7	75	24.8577	88	98	0.897959	4.9	1.59	1.03	8.12	2.09433	3	1	1	2	3	2	2	5	5	17	1
H406	male	23	100	80	165.4	59	21.5666	73.5	94	0.781915	4.2	1.47	1.28	14.6	2.68102	3	2		1	5	0	0	0	0	5	1
H408	male	26	126	86	164.3	56	20.745	81.2	91.5	0.887432	5.1	1.74	1.74	13.2	2.58022	3	2		1	4	5	5	5	4	23	2
H413	male	21	114	64	167.6	60.5	21.5381	72	90	0.8	4.4	0.38	1.61	10.88	2.38693	3	1	1	1	4	4	4	5	4	21	1
H414	male	27	112	68	175	78.5	25.6327	85.5	97	0.881443	4.6	1.23	1.21	11.2	2.41591	3	1	1	1	5	5	5	5	5	25	2
H415	male	26	116	80	167.1	54	19.3393	68.5	87	0.787356	4.7	1.38	1.23	11.85	2.47233	3	1	1	1	4	4	5	5	5	23	2
H422	male	23	110	70	170	50	17.301	70	82.2	0.851582	4.9	1.42	1.88	11.96	2.48157	3	2		1	4	4	5	5	4	22	2
H429	male	23	104	60	176.7	63	20.1775	68.5	89	0.769663	4.7	0.78	1.61	12.88	2.55568	3	2		1	4	5	5	5	5	24	2
H430	male	24	120	70	165.5	80	29.2075	89.5	103.7	0.863067	5.4	1.71	1.44	12.1	2.49321	2	1	1	1	4	5	5	5	4	23	2
H437	male	34	114	70	171.5	60	20.3997	73.5	90.5	0.812155	5.2	0.8	1.36	15.75	2.75684	3	1	1	1	5	5	5	5	4	24	2
H446	male	26	100	70	173.1	63	21.0255	71.3	88.2	0.80839	4.9	0.69	1.83	15.87	2.76443	3	2		1	5	5	5	5	4	24	2
H457	male	38	102	70	175.2	74	24.1081	80.5	95	0.847368	4.7	0.65	1.24	10.48	2.34947	3	2		1	4	4	4	5	4	21	1
H458	male	31	120	86	174.6	81	26.5703	93.3	101.2	0.921937	5.6	3.54	1.27	12.63	2.53607	3	1	1	1	3	4	4	5	5	21	1
H472	male	39	130	80	172.5	71.5	24.0286	85.6	95.6	0.895397	6	6.83	0.96	14.22	2.65465	3	1	1	1	4	4	4	5	5	22	2
H484	male	39	126	88	170.5	81	27.8635	94.2	94.2	1	5.8	1.31	1.04	16.19	2.78439	3	1	1	1	5	5	5	5	5	25	2
H490	male	34	98	64	168.3	60	21.1828	74	90.8	0.814978	4.3	0.78	1.59	14.5	2.67415	3	2		1	4	4	4	5	4	21	1
H503	male	26	110	80	169.2	57.5	20.0848	77.6	90	0.862222	4.7	0.87	1.88	13.57	2.60786	3	1	1	1	5	5	5	5	5	25	2
H506	male	25	106	80	169.7	64	22.2237	77	90.5	0.850829	5.1	0.71	1.27	13.57	2.60786	3	2		1	4	4	4	4	4	20	1
H508	male	29	120	70	165	54.5	20.0184	70	82.5	0.848485	4.8	0.8	1.96	9.38	2.23858	3	2		1	5	5	5	5	4	24	2
H510	male	30	110	74	166	58.5	21.2295	74.5	90.5	0.823204	5	1.14	1.21	12.48	2.52413	3	2		1	4	5	4	5	5	23	2
H512	male	28	126	70	165.4	59	21.5666	76	87.8	0.865604	5	1	1.22	15.19	2.72064	3	2		1	3	4	5	5	5	22	2
H513	male	27	110	70	173.5	54.5	18.105	70.7	86	0.822093	4.9	2.88	1.89	15.41	2.73502	3	1	1	1	5	5	5	5	5	25	2
H514	male	42	140	90	173.2	70	23.3347	92.5	94.2	0.981953	4.7	1.25	1.53	14.09	2.64547	2	2		1	3	5	5	5	5	23	2
H515	male	48	120	80	159.4	75	29.5178	83.6	94.5	0.884656	4.6	0.65	1.4	14.33	2.66236	3	2		1	3	3	3	4	4	17	1
H516	male	31	106	70	170.3	69	23.7914	86	95.5	0.900524	5.1	0.96	1.14	14.23	2.65535	3	2		1	4	4	4	5	4	21	1
H518	male	40	146	82	163.9	74	27.547	92	98.4	0.934959	5	1.53	1.24	12.73	2.54396	3	2		2	3	2	5	5	5	20	1
H520	male	23	100	70	166.7	62.5	22.491	74	86	0.860465	5.2	0.79	1.71	12.95	2.5611	2	1	1	1	5	4	5	4	4	22	2
H524	male	35	126	80	172.8	72	24.1127	85	97	0.876289	4.9	1.39	1.31	15.3	2.72785	3	1	1	1	5	5	5	5	5	25	2
H525	male	36	140	100	168.8	92	32.2881	102.5	109.8	0.933515	5.4	1.8	0.95	15.27	2.72589	3	1	1	2	4	5	5	5	5	24	2
H529	male	44	110	80	173.3	72.5	24.1402	89.8	96	0.935417	4.9	1.5	1.37	12.6	2.5337	3	2		1	3	4	4	5	5	21	1
H531	male	35	120	82	165.6	60	21.8792	80.3	90	0.892222	5.5	0.65	1.96	11.04	2.40153	3	1	1	1	4	5	5	5	5	24	2
H532	male	35	150	100	162.1	61	23.2147	79.5	90	0.883333	5.2	1.11	1.15	10.41	2.34277	3	1	1	2	3	5	5	5	4	22	2
H533	male	46	100	70	157.5	70	28.2187	86.5	93.6	0.924145	6	2.08	0.91	15.57	2.74535	3	1	1	1	3	4	4	5	4	20	1
H534	male	40	120	90	181.3	87.5	26.6203	90.6	105	0.862857	6.2	2.41	0.98	12.26	2.50634	3	2		2	5	5	5	5	5	25	2
H535	male	28	104	64	170.9	69	23.6246	84	94.5	0.888889	4.5	1.39	1.21	15.61	2.74791	3	2		1	5	5	5	5	5	25	2
H536	male	43	140	90	168.7	79	27.7586	93.1	100.5	0.926368	5.7	1.44	1.31	11.72	2.4613	3	2		1	3	4	4	5	4	20	1
H562	male	33	96	80	176.5	76	24.3963	89.3	90.7	0.984564	17.2	1.96	1.11	10.45	2.3466	3	1	1	1	5	5	5	5	5	25	2
H565	male	40	120	74	176.7	78.5	25.1418	88.2	97	0.909278	5.4	2.95	1.06	9.59	2.26072	3	2		1	5	5	5	5	4	24	2
H578	male	47	120	78	168.9	56.5	19.8057	92.6	101	0.916832	5.6	2.55	1.16	14.97	2.70605	3	2		1	4	5	5	5	5	24	2
H580	male	41	130	80	165.8	87	31.6483	100.5	107.5	0.934884	5.1	4.54	0.85	14.62	2.68239	3	2		1	4	5	5	5	4	23	2
H584	male	52	130	70	165.2	68	24.9166	86.5	94	0.920213	6.4	1.01	1.23	14.64	2.68376	3	2		2	3	3	4	5	5	20	1
H586	male	27	118	70	171.4	69	23.487	84.5	97	0.871134	4.4	2.02	1.19	14.5	2.67415	3	2		1	5	5	5	5	5	25	2
H587	male	48	120	80	174.2	74	24.3857	88	97.2	0.90535	4.3	1.1	1.31	12.01	2.48574	3	2		1	3	4	4	5	4	20	1
H589	male	62	130	86	169.6	60.5	21.0331	85.5	89.2	0.95852	4.7	0.89	1.35	10.83	2.38232	3	1	1	1	1	2	2	2	2	9	1
H590	male	45	120	80	166.6	64	23.0584	73.5	93.5	0.786096	4.7	0.63	1.36	13.33	2.59002	3	1	1	1	3	4	4	5	4	20	1
H592	male	40	100	64	170.5	71.5	24.5956	88.6	92.5	0.957838	4.5	1.09	1.01	13.92	2.63333	3	1	1	1	3	3	3	5	4	18	1
H593	male	30	110	70	173.9	62	20.5018	73.5	93.5	0.786096	4.4	0.38	1.79	15.45	2.73761	3	2		1	5	5	5	5	5	25	2
H595	male	28	120	70	167.1	58.5	20.9509	81.3	95	0.855789	4.9	1.09	1.48	11.58	2.44928	3	2		1	3	4	4	5	4	20	1
H597	male	31	120	86	164	71	26.398	83.8	97	0.863918	4.8	1.73	1.23	12.12	2.49486	3	2		1	4	4	4	5	5	22	2
H598	male	25	120	70	163.2	72.5	27.2206	88	99	0.888889	4.6	2.01	1.24	11.98	2.48324	3	1	1	1	4	5	5	5	4	23	2
H603	male	52	150	100	171.8	77.5	26.2576	92.3	97	0.951546	5.7	0.62	1.37	12.94	2.56032	3	2		1	3	4	4	5	4	20	1
H604	male	45	120	80	163.2	68	25.531	88	93	0.946237	5.8	2.09	1.24	13.93	2.63404	3	2		1	3	2	5	5	4	19	1
H605	male	50	104	64	155.5	54	22.3323	75.4	86.5	0.871676	5.5	0.49	1.34	14.02	2.64048	3	1	2	1	3	3	3	3	3	15	1
H606	male	35	114	80	171.7	71.5	24.253	80	95.5	0.837696	5.3	2.81	1.22	10.82	2.3814	3	2		1	5	5	5	5	4	24	2
H612	male	25	110	70	172.8	61.5	20.5962	76.5	92	0.831522	4.9	0.69	1.25	15.52	2.74213	3	2		1	5	5	5	5	5	25	2
H613	male	46	90	58	174.4	56.5	18.5761	70	85.5	0.818713	5.5	0.47	1.64	14.92	2.7027	3	2		1	0	0	5	5	5	15	1
H617	male	35	110	70	183.5	86	25.5403	91.7	98.2	0.933809	5.2	1.62	1.29	12.59	2.5329	3	2		1	5	5	5	5	4	24	2
H618	male	38	136	100	165.5	86	31.398	96	102	0.941176	6	3.11	1.53	10.87	2.38601	3	2		1	5	5	5	5	5	25	2
H619	male	30	130	90	166.5	75.5	27.2344	80.5	97.5	0.825641	5.3	0.92	1.35	14.33	2.66236	2	1	1	1	3	4	2	5	5	19	1
H623	male	24	140	92	172.1	79	26.6726	88.2	100	0.882	5	0.69	1.3	12.74	2.54475	3	2		1	5	0	0	0	0	5	1
H624	male	31	120	80	173.8	68.5	22.6773	80.5	97	0.829897	5.2	1.02	1.45	13.57	2.60786	3	2		1	3	5	5	5	3	21	1
H625	male	41	130	78	164.5	61.5	22.7271	82	90	0.911111	5.1	0.56	1.51	12.29	2.50879	2	1	1	1	4	5	5	5	4	23	2
H626	male	29	100	70	174	63	20.8086	73	92	0.793478	4.8	1.02	1.44	12.17	2.49897	3	2		1	5	5	5	5	5	25	2
H628	male	46	104	68	176.3	74	23.8082	86.7	97	0.893814	4.6	0.93	1.4	15.03	2.71005	3	2		2	5	5	5	5	0	20	1
H633	male	24	120	80	170.5	69	23.7356	78.5	95.5	0.82199	4.2	0.94	1.28	11.02	2.39971	3	2		1	4	5	5	5	5	24	2
H637	male	43	124	70	168.3	69	24.3602	84	93	0.903226	4.8	2.63	0.95	13.68	2.61593	3	2		1	4	5	5	5	5	24	2
H639	male	22	100	68	165.7	75	27.3159	86	103	0.834951	4.8	0.55	1.43	11.38	2.43186	3	2		1	5	5	5	5	5	25	2
H643	male	39	126	70	165.7	73.5	26.7696	92	97	0.948454	4.9	0.76	1.49	12.13	2.49568	3	2		1	4	5	5	5	5	24	2
H645	male	41	108	80	166.7	82.5	29.6881	104.2	102.5	1.01659	6.4	1.14	1.33	15.04	2.71071	3	2		1	2	2	2	3	3	12	1
H647	male	44	114	80	173	83	27.7323	101.5	104	0.975962	4.8	1.18	1.03	11.83	2.47064	3	1	1	2	4	4	4	4	4	20	1
H650	male	33	110	70	171.6	64.5	21.9041	76.2	92	0.828261	4.7	0.89	1.5	14.23	2.65535	3	1	1	1	5	5	5	5	5	25	2
H651	male	26	118	88	175.5	57.5	18.6687	72	88.8	0.810811	4.9	1.13	1.53	14.72	2.68921	3	2		1	4	5	5	5	4	23	2
H652	male	25	120	70	168.3	66.5	23.4776	80.4	94.5	0.850794	4.7	1.55	1.59	14.77	2.6926	3	2		1	3	4	4	5	4	20	1
H654	male	29	88	60	165	52	19.1001	68.5	83.5	0.820359	4.8	0.77	1.49	9.92	2.29455	3	1	1	1	3	4	4	5	4	20	1
H659	male	38	90	54	164	55	20.4491	67.3	85.7	0.785298	5	0.41	1.41	11.36	2.4301	2	1	1	1	3	4	4	5	4	20	1
H665	male	44	120	80	169	69	24.1588	82.6	90	0.917778	5	1.74	0.95	12.25	2.50553	3	1	1	1	3	5	5	5	5	23	2
H667	male	36	110	70	159.2	78.5	30.973	98.5	98.4	1.00102	5	1.94	1.3	12.33	2.51204	2	1	2	1	5	5	5	5	4	24	2
H668	male	26	108	88	161.6	64.5	24.6989	81	87.2	0.928899	5.1	0.36	1.57	12.11	2.49403	3	2		1	3	5	5	5	5	23	2
H670	male	46	150	90	161.9	59.5	22.6999	72	89.3	0.806271	5	0.45	1.27	13.91	2.63261	3	2		1	3	4	4	5	5	21	1
H673	male	37	138	80	168.9	56	19.6304	68.8	82	0.839024	5.8	1.52	1.31	9.65	2.26696	2	1	1	1	5	4	4	5	4	22	2
H677	male	37	126	90	174	73	24.1115	81.7	93	0.878495	5.2	2.3	1.15	10.44	2.34564	3	1	1	1	5	5	5	5	5	25	2
H678	male	39	120	80	164	82.5	30.6737	94	101.7	0.924287	4.9	1	1.22	16.13	2.78068	3	2		1	3	3	3	4	5	18	1
H681	male	31	94	68	164	69	25.6544	91.5	94.5	0.968254	4.7	1	1.14	10.74	2.37398	3	1	2	1	3	4	4	4	4	19	1
H683	male	26	108	70	156.5	47.5	19.3939	69	81.5	0.846626	4.9	0.9	2.04	11.74	2.463	3	2		1	4	4	4	5	5	22	2
H685	male	47	100	70	167.5	67	23.8806	84.4	94.7	0.891235	5.2	1.36	1.02	9.3	2.23001	3	1	1	1	3	3	3	4	4	17	1
H690	male	40	100	62	169.5	65.5	22.7983	80.2	90	0.891111	4.6	1.28	1.3	8.3	2.11626	3	2		1	4	4	4	4	4	20	1
H694	male	27	120	80	174.6	96	31.4907	97.3	108	0.900926	5.2	4.66	1.19	11.76	2.4647	3	1	1	1	4	4	5	5	4	22	2
H697	male	36	130	80	164	64	23.7954	80	94	0.851064	4.8	1.03	1.4	13.79	2.62394	3	2		1	5	5	5	5	5	25	2
H699	male	32	124	87	171.5	82	27.8795	93.5	100	0.935	5.2	2.04	1.09	13.06	2.56955	3	2		2	5	5	5	5	4	24	2
H705	male	38	120	82	177.6	79.5	25.2047	88	100.5	0.875622	4.5	0.85	1.47	12.31	2.51041	3	2		1	5	5	5	5	5	25	2
H707	male	44	96	62	172.9	77	25.7573	86.6	92.5	0.936216	4.6	2.5	1.05	8.6	2.15176	3	1	1	1	3	4	4	5	5	21	1
H714	male	46	130	76	164.5	62.5	23.0966	77.5	90.3	0.85825	4.5	2.12	1.3	11.02	2.39971	3	2		1	3	4	4	4	3	18	1
H715	male	32	120	82	165.2	68	24.9166	84.5	96	0.880208	4.7	0.98	1.12	14.64	2.68376	3	1	1	1	3	5	5	5	5	23	2
H719	male	40	120	100	170.3	54.5	18.7917	70	85	0.823529	5.3	1.11	1.75	13.75	2.62104	2	1	1	1	5	5	5	5	5	25	2
H720	male	57	130	70	178.3	89.5	28.1527	104.5	103	1.01456	4.8	1.33	1.65	11.58	2.44928	3	1	1	1	3	2	3	4	4	16	1
H722	male	29	100	64	171.5	46.5	15.8097	64.5	83	0.777108	5	0.46	1.75	14.38	2.66584	3	2		1	3	5	5	5	4	22	2
H723	male	35	120	84	178	73	23.04	85.3	94.5	0.902646	4.9	2.13	0.95	11.8	2.4681	3	2		1	4	4	1	5	5	19	1
H725	male	40	120	70	176.5	78	25.0383	95	94.5	1.00529	4.9	1.59	1.36	11.29	2.42392	3	1	1	1	3	4	5	5	4	21	1
H730	male	40	110	72	176.5	73	23.4333	81.3	94.5	0.860317	5.6	1.9	0.78	13.91	2.63261	3	1	1	1	3	4	4	5	4	20	1
H736	male	57	150	88	160.5	68.5	26.5914	90	96.5	0.932642	5.3	0.95	1.27	13.66	2.61447	3	2		1	3	5	5	5	5	23	2
H738	male	52	120	86	172	75	25.3515	87.5	93	0.94086	4.8	1.1	1.21	11.61	2.45187	3	1	1	1	5	5	5	5	5	25	2
H739	male	55	130	78	172.7	75	25.1464	92	96.5	0.953368	5	2.43	1.1	11.37	2.43098	3	2		1	3	3	3	5	4	18	1
H744	male	44	110	86	166	73	26.4915	94.5	99.5	0.949749	5.4	4.03	1.15	11.19	2.41502	3	1	1	1	5	5	5	5	5	25	2
H745	male	38	100	74	164.5	69	25.4987	79	92.3	0.855905	5	0.82	1.53	12.44	2.52092	3	2		1	4	5	5	5	1	20	1
H746	male	40	130	80	170.5	63.5	21.8436	77	93.5	0.823529	4.9	0.71	1.64	12.44	2.52092	3	2		1	5	5	5	5	5	25	2
H756	male	28	100	70	166	50.5	18.3263	66	83.5	0.790419	5.1	0.65	1.63	12.04	2.48823	3	2		1	4	4	4	4	4	20	1
H758	male	30	130	90	169.3	58.5	20.41	72.7	89	0.816854	4.5	1.01	1.29	11.9	2.47654	3	2		1	4	5	5	5	5	24	2
H759	male	47	130	84	173	66.5	22.2193	87	96.8	0.89876	5.4	2.16	1.24	14.57	2.67896	3	1	2	1	5	5	5	5	5	25	2
H760	male	41	120	70	168.7	65.5	23.015	77.5	92	0.842391	5.5	1.51	1.25	12.3	2.5096	3	2		1	4	4	4	5	4	21	1
H766	male	30	120	76	170.2	74.5	25.718	84.8	97	0.874227	4.9	2.43	1.22	13.59	2.60933	3	1	1	1	5	5	5	5	5	25	2
H767	male	55	130	64	174.2	64	21.0903	81.5	92	0.88587	7.1	2.03	1.23	9.53	2.25444	3	1	1	2	4	3	3	4	4	18	1
H768	male	50	120	80	168	67.5	23.9158	80.5	95	0.847368	5.6	0.64	1.25	13.03	2.56725	3	2		1	3	4	5	5	4	21	1
H770	male	53	126	70	171.1	62.5	21.3491	80	91.5	0.874317	6	0.71	1.59	12.14	2.49651	3	1	1	1	3	5	5	5	5	23	2
H771	male	48	106	80	171	60	20.5191	79	90	0.877778	4.6	2.73	0.96	12.35	2.51366	3	1	1	1	4	5	5	5	5	24	2
H773	male	28	136	70	163.9	57.5	21.4047	69.5	87	0.798851	4.5	0.51	1.51	9.25	2.22462	3	2		1	3	4	4	5	4	20	1
H776	male	44	130	80	164.3	62.5	23.1529	81.5	92	0.88587	6.1	0.84	1.34	15.99	2.77196	3	2		1	3	5	4	5	4	21	1
H779	male	29	90	64	172.2	65	21.9203	75.5	93.5	0.807487	5.2	0.8	1.51	14.76	2.69192	3	2		1	5	5	5	5	5	25	2
H781	male	32	120	70	172.7	72.5	24.3082	80.3	97	0.827835	4.9	0.78	1.05	10.93	2.39151	3	2		2	4	5	5	5	5	24	2
H782	male	44	100	84	176.8	70.5	22.5541	84.2	93	0.905376	5	1.52	1.51	11.23	2.41859	3	2		1	3	4	4	0	4	15	1
H787	male	46	140	90	166.5	63.5	22.9058	84	94.5	0.888889	5.3	0.98	1.66	12.39	2.51689	3	1	1	1	4	5	5	5	5	24	2
H799	male	26	110	70	173	75	25.0593	90.3	99.2	0.910282	5.4	1.51	1.49	14.06	2.64333	3	2		1	3	5	4	4	3	19	1
H800	male	27	108	86	162.3	55	20.8798	70	87.8	0.797267	5	0.86	1.49	15.69	2.75302	3	1	1	1	5	5	5	5	5	25	2
H802	male	60	132	82	168.5	68	23.9502	90.5	91.2	0.992325	4.9	1.92	1.29	11.75	2.46385	3	1	1	1	3	4	2	5	4	18	1
H803	male	30	110	64	176.3	76	24.4517	82.5	98.2	0.840122	5.1	0.81	1.22	15.06	2.71204	3	2		1	4	5	5	5	0	19	1
H804	male	31	120	78	167	65	23.3067	73	93	0.784946	4.7	1.14	1.25	14.82	2.69598	3	2		1	4	4	5	5	4	22	2
H806	male	31	120	76	164.5	62	22.9118	79.5	91	0.873626	5.6	4.76	1.23	14.84	2.69733	3	2		1	5	5	5	5	5	25	2
H808	male	35	130	90	175	77	25.1429	89	93	0.956989	5.3	3.05	1.08	12.73	2.54396	2	1	1	1	3	4	5	5	4	21	1
H809	male	45	150	92	164.1	83	30.822	101.7	102.5	0.992195	7.6	1.19	1.22	12.03	2.4874	2	1	1	1	3	3	3	5	4	18	1
H813	male	30	112	80	165.3	68.5	25.0695	82.5	94.5	0.873016	5.7	0.94	1.23	11.26	2.42126	3	2		1	4	4	4	4	5	21	1
H815	male	36	118	80	168.1	64	22.6488	79.6	90.5	0.879558	5.5	1.2	1.32	11.21	2.41681	3	2		1	3	5	5	5	5	23	2
H817	male	39	104	70	175.5	66	21.4284	78.5	82	0.957317	5.6	1.01	1.5	12.58	2.53211	3	1	1	1	3	4	3	3	3	16	1
H82	male	28	130	88	171	76	25.9909	93	98	0.94898	5.4	1.05	1.28	12.44	2.52092	2	1	1	1	3	4	4	4	4	19	1
H820	male	45	120	70	173	77	25.7276	92.7	92	1.00761	5.9	0.99	1.1	10.69	2.36931	3	2		1	3	3	4	5	4	19	1
H821	male	32	120	80	176.3	86	27.669	96.7	101	0.957426	4.9	2.52	1.68	12.07	2.49072	3	2		1	4	5	5	5	5	24	2
H822	male	26	120	80	171.8	75	25.4106	86.3	98.3	0.877925	5.1	0.93	1.23	10.8	2.37955	3	2		1	4	5	5	5	4	23	2
H823	male	38	140	90	167.5	79	28.1577	91	102	0.892157	5.4	1.74	1.17	15.03	2.71005	2	2		1	3	3	4	5	4	19	1
H825	male	25	130	80	165.9	68	24.7068	78	89.2	0.874439	4.3	3.33	0.93	11.53	2.44495	3	2		1	3	5	2	5	4	19	1
H828	male	37	120	85	170.5	66.5	22.8756	63.2	87	0.726437	5.1	1.45	1.47	12.83	2.55179	3	1	1	1	4	5	4	5	5	23	2
H829	male	45	120	90	171.5	66	22.4396	82.5	89	0.926966	5.1	3.24	1.29	9.85	2.28747	3	1	1	1	3	3	4	3	4	17	1
H831	male	29	90	70	172.1	74	24.9845	88	96	0.916667	5.3	2.36	1.22	11.14	2.41054	3	2		1	4	5	5	5	5	24	2
H834	male	46	140	100	174.3	80	26.3327	97.6	97.3	1.00308	7.7	6.11	1.21	10.67	2.36744	3	1	2	1	5	5	5	5	5	25	2
H844	male	40	118	80	164.1	67	24.8804	87.2	91	0.958242	5.6	3.37	0.94	10.06	2.30857	2	1	1	2	3	5	5	0	4	17	1
H845	male	21	125	78	164	52.5	19.5196	71.6	85.5	0.837427	5.1	1.59	1.14	11.6	2.45101	3	1	1	1	3	2	3	5	4	17	1
H846	male	30	118	80	168.8	70	24.5671	82	92.2	0.889371	5.2	1.58	1.35	14	2.63906	3	1	1	1	3	4	5	5	5	22	2
H847	male	52	160	110	161.5	71	27.2216	91.3	97.5	0.93641	4.9	1.43	1.21	10.38	2.33988	3	2		1	3	5	5	5	5	23	2
H848	male	37	100	70	166.2	51.5	18.6443	80	91.3	0.876232	4.6	1.59	1.36	8.41	2.12942	2	1	1	2	3	4	5	5	5	22	2
H850	male	24	120	76	165	56	20.5693	64.5	85.7	0.752625	4.3	0.4	1.4	13.95	2.63548	3	2		1	5	5	5	5	5	25	2
H851	male	45	96	66	168.5	61.5	21.6608	75.7	89	0.850562	5	0.72	1.56	11.9	2.47654	3	2		1	2	2	2	4	4	14	1
H853	male	25	120	70	175	71	23.1837	79.7	94	0.847872	5.1	0.59	1.38	16.02	2.77384	3	2		1	3	4	4	5	4	20	1
H854	male	22	98	70	164.6	49.5	18.2703	65.3	83	0.786747	4.9	0.83	1.39	13.02	2.56649	3	2		1	4	5	5	5	4	23	2
H861	male	38	120	80	170	67	23.1834	83	91.9	0.903156	4.9	0.73	1.5	10.56	2.35707	3	2		2	5	5	5	5	5	25	2
H869	male	25	108	70	172	68.5	23.1544	81.5	92.7	0.87918	4.9	0.89	1.44	10.27	2.32923	3	2		1	3	5	5	5	5	23	2
H872	male	36	110	70	169.5	66	22.9723	81.6	90.5	0.901657	5.7	0.98	1.32	8.12	2.09433	3	1	1	1	4	5	5	5	5	24	2
H880	male	40	118	68	175.2	56	18.244	72.8	85.3	0.853458	5	1.01	1.86	11.38	2.43186	3	1	1	1	3	4	4	5	4	20	1
H886	male	41	118	80	163.5	57	21.3226	81	86	0.94186	4	1.28	1.85	11	2.3979	3	1	1	1	4	5	1	5	5	20	1
H889	male	34	104	60	176.5	73	23.4333	82	95	0.863158	4.7	0.89	1.26	11.21	2.41681	3	1	1	2	4	5	5	5	5	24	2
H894	male	32	110	70	167.4	58.5	20.8759	79	88.5	0.892655	4.7	2.94	1.02	10.47	2.34851	3	1	1	1	5	5	5	5	5	25	2
H897	male	40	130	80	180.6	82.5	25.2941	92.8	97	0.956701	4.3	3.44	1.33	14.66	2.68512	3	2		1	4	4	4	4	4	20	1
H899	male	44	130	80	176.7	83	26.5831	94.5	100.5	0.940299	5.3	1.71	1.29	9.58	2.25968	3	1	1	1	5	5	5	5	5	25	2
H902	male	32	120	80	160.6	56.5	21.9057	78	84.5	0.923077	4.4	1.97	1.44	12.22	2.50307	3	1	1	1	5	5	5	5	5	25	2
H903	male	33	120	86	162.1	54	20.5508	71	85.5	0.830409	5.1	0.56	2.01	13.24	2.58324	3	2		1	5	5	5	5	5	25	2
H905	male	44	130	80	166	59	21.4109	79.5	92	0.86413	5.7	3.18	1.31	11.83	2.47064	3	1	2	1	4	5	5	5	4	23	2
H910	male	39	120	80	170.5	77	26.4876	90.3	96.3	0.937695	5.5	3.69	0.89	13.61	2.6108	3	2		1	4	4	4	4	5	21	1
H913	male	40	110	78	176.5	78	25.0383	85.7	96	0.892708	4.5	0.5	1.6	10.93	2.39151	3	2		1	4	5	5	5	5	24	2
H915	male	35	100	70	160	59	23.0469	80.5	89.5	0.899441	5.2	0.62	1.73	12.05	2.48906	3	1	2	1	5	5	5	5	4	24	2
H916	male	31	120	80	167.8	54.5	19.3559	68.2	86.5	0.788439	4.9	1.13	1.32	10.4	2.34181	3	1	1	1	4	5	5	5	5	24	2
H919	male	51	120	90	160.4	74.5	28.9566	96	101	0.950495	5.5	1.68	1.12	10.05	2.30757	3	2		1	4	5	5	5	5	24	2
H920	male	43	94	70	167.5	65.5	23.346	87.3	92.4	0.944805	5.3	1.52	1.48	13.75	2.62104	3	1	1	1	4	5	5	5	5	24	2
H922	male	33	110	78	164.3	74.5	27.5982	87.3	97.5	0.895385	5.1	1.59	1.35	10.51	2.35233	3	1	1	1	3	5	4	5	4	21	1
H923	male	33	120	86	169.4	95	33.1052	105	106	0.990566	6	3.81	1	11.8	2.4681	3	1	1	1	4	5	5	5	5	24	2
H925	male	39	140	110	165.7	66.5	24.2201	84.5	91	0.928571	5.5	1.84	1.23	11.59	2.45014	3	2		1	4	5	5	5	5	24	2
H929	male	44	110	80	173.5	73	24.2507	89	93.5	0.951872	5.5	2.52	0.9	13.28	2.58626	3	1	1	1	4	5	5	5	5	24	2
H930	male	40	120	70	169.7	86	29.8631	95.5	104.5	0.913876	5.6	1.11	1.32	12.1	2.49321	3	1	1	1	3	5	5	5	5	23	2
H934	male	45	140	90	164.8	65	23.9331	88.5	94	0.941489	5.1	3.3	1.06	13.97	2.63691	3	1	1	1	3	5	4	5	4	21	1
H935	male	63	150	100	166.3	69	24.9497	87.8	90	0.975556	4.6	1.56	1.35	8.59	2.1506	3	1	1	1	3	4	4	5	5	21	1
H936	male	43	120	88	161.4	74.5	28.5989	95	97	0.979381	4.7	4.37	1.09	13.82	2.62612	3	1	1	2	3	5	5	3	5	21	1
H938	male	60	160	110	164	71.5	26.5839	83.6	94.7	0.882788	5	1.79	1.32	10.93	2.39151	3	2		1	3	2	3	4	3	15	1
H939	male	41	132	80	161	63	24.3046	80	91	0.879121	5.7	0.71	1.82	13.88	2.63045	2	2		2	3	4	4	4	4	19	1
H942	male	54	130	88	171.5	72.5	24.6496	90	94.5	0.952381	5.7	1.26	1.4	7.75	2.04769	3	1	1	1	4	5	5	5	5	24	2
H955	male	44	130	80	169	89	31.1614	94.7	105.5	0.89763	6	13.91	1.5	7.47	2.01089	3	1	1	1	5	5	5	5	5	25	2
H957	male	62	160	110	172.1	80	27.0102	91	98	0.928571	6.7	2.31	1.54	7.96	2.07443	3	2		1	3	3	1	3	1	11	1
H958	male	52	120	80	173.7	78	25.852	86	96	0.895833	5.2	2.59	1.2	12.28	2.50797	3	1	1	1	3	2	2	4	5	16	1
H960	male	43	130	70	167.7	64.5	22.9347	83.8	92.5	0.905946	4.7	2.57	1.31	10.34	2.33602	3	1	1	1	3	3	3	3	3	15	1
H965	male	56	138	80	174	78.5	25.9281	87.5	100	0.875	4.6	1.56	1.06	10.63	2.36368	3	2		1	2	3	3	4	2	14	1
H967	male	43	100	74	165	95	34.8944	104.3	108.2	0.963956	5.2	3.83	0.97	12.06	2.48989	3	1	1	1	3	3	3	4	4	17	1
H969	male	30	120	80	170	62.5	21.6263	74.5	74.3	1.00269	5	0.99	1.89	13.05	2.56879	3	2		1	5	0	0	0	0	5	1
H970	male	32	120	100	170	74.5	25.7785	78.5	96	0.817708	5.7	1.05	1.41	12.11	2.49403	3	1	1	1	5	5	5	5	5	25	2
H971	male	41	120	90	167	80	28.6851	87.5	93.6	0.934829	4.7	1.89	1.84	11.83	2.47064	3	1	1	1	5	4	5	5	5	24	2
H974	male	33	114	80	174.8	83	27.1641	94.8	102	0.929412	4.8	1.03	1.61	13.56	2.60712	3	2		1	3	5	5	5	5	23	2
H975	male	47	102	68	166.7	68	24.4702	84.3	93.5	0.901604	5	1.14	1.16	13.9	2.63189	3	2		1	4	4	4	5	4	21	1
H977	male	40	110	70	165.1	59.5	21.8284	79	88	0.897727	5.8	2.98	1.32	10.61	2.3618	3	1	1	1	5	5	5	5	5	25	2
H981	male	25	140	100	174.2	78.5	25.8686	87.3	100.2	0.871257	6	1.99	1.75	13.11	2.57338	3	2		1	5	5	5	5	4	24	2
H982	male	48	124	86	172.7	65.5	21.9612	83	90	0.922222	4.8	0.7	1.61	14.91	2.70203	3	1	1	1	3	4	4	5	4	20	1
H984	male	38	150	90	166	58	21.048	73.5	86.3	0.85168	5.5	2.18	1.6	13.34	2.59077	3	1	1	1	4	4	4	4	4	20	1
H988	male	39	110	80	174	73.5	24.2767	86	93.6	0.918803	5.5	1.72	1.68	12.03	2.4874	3	2		1	3	4	3	3	4	17	1
H991	male	35	140	110	165.5	67	24.4613	84.7	90.5	0.935912	6.6	3.02	1.81	10.81	2.38047	3	1	1	1	0	5	4	5	4	18	1
H994	male	36	110	88	164.4	76.5	28.3047	85	102	0.833333	4.4	1.43	1.49	11.8	2.4681	3	1	1	1	3	4	5	5	5	22	2
H995	male	47	120	76	175.5	71.5	23.2141	85.4	94.5	0.903704	5.7	1.17	1.23	14.62	2.68239	3	2		1	4	4	5	5	5	23	2
H997	male	45	118	78	165.3	67.5	24.7035	88.6	93	0.952688	5.2	2.77	1.23	11.02	2.39971	3	2		1	3	5	5	5	5	23	2
H999	male	47	100	60	170.7	73.5	25.2244	87	97	0.896907	5.5	4	1.04	13.4	2.59525	3	2		1	4	5	5	5	4	23	2
R1002	male	24	110	70	169.5	70	24.3646	80	95.5	0.837696	4.7	1.52	1.27	12.79	2.54866	3	2		1	5	0	0	0	0	5	1
R1004	male	25	110	70	162.2	58	22.0458	73.6	86.5	0.850867	5.3	0.98	2.1	14.99	2.70738	3	2		1	5	5	5	5	5	25	2
R101	male	40	110	86	168.8	66.5	23.3387	86	90.4	0.951327	5.2	1.04	1.04	12.79	2.54866	3	2		1	3	4	4	4	4	19	1
R1010	male	27	100	60	162	74	28.1969	91	94.2	0.96603	7.9	25.69	3.27	9.72	2.27419	3	1	1	1	3	5	5	5	5	23	2
R1019	male	34	132	92	168.5	92	32.4032	100.5	101.2	0.993083	5.7	0.96	1.43	13.95	2.63548	2	1	1	1	4	5	5	5	5	24	2
R1020	male	35	120	80	174.5	73	23.9735	80.7	93.4	0.864026	6.3	0.65	1.36	14.48	2.67277	2	1	1	1	5	5	5	5	5	25	2
R1021	male	24	120	80	175.2	70	22.805	79	89.3	0.884658	6	1.38	1.27	12	2.48491	2	1	1	1	3	4	4	5	4	20	1
R1023	male	36	130	82	162	59.5	22.6718	76	90	0.844444	6.3	0.64	1.41	13.51	2.60343	2	1	1	1	4	4	4	5	4	21	1
R1026	male	33	110	70	168.5	70	24.6546	86.3	92.5	0.932973	4.6	3.34	0.97	14.31	2.66096	2	1	1	1	3	5	5	5	5	23	2
R1027	male	39	120	78	166	53.5	19.415	68.5	83	0.825301	5.7	1.53	1.67	10.86	2.38509	3	1	1	1	5	5	5	5	5	25	2
R1029	male	28	100	70	170.8	67.5	23.1381	84.5	95.5	0.884817	5.3	1.18	1.02	14.17	2.65113	3	2		2	3	4	4	5	5	21	1
R103	male	32	100	70	170.2	65.5	22.6111	77.4	92.2	0.839479	4.2	1.08	1.17	12.39	2.51689	3	1	1	1	3	5	5	5	4	22	2
R1034	male	44	130	80	160.7	68	26.3316	87	95.5	0.910995	5.6	1.21	1.29	13.02	2.56649	3	1	1	1	3	5	5	5	5	23	2
R1035	male	33	140	92	169	82.5	28.8855	95	98	0.969388	7.9	1.95	1.07	15.86	2.7638	3	1	1	1	4	5	5	5	4	23	2
R1041	male	45	116	80	171	71	24.281	85	90.6	0.93819	5.9	1.62	1.49	10.75	2.37491	3	1	2	1	4	4	4	4	4	20	1
R1042	male	42	110	82	164.1	57	21.1669	75.5	85.4	0.884075	4.5	1.07	1.19	15.91	2.76695	2	1	2	1	3	4	4	5	4	20	1
R1044	male	26	100	60	165	52	19.1001	65.2	78	0.835897	5	0.58	1.45	14.33	2.66236	2	1	1	1	3	4	5	5	5	22	2
R1046	male	23	110	70	177	66	21.0667	79.2	90.3	0.877076	4.2	0.44	1.2	15.6	2.74727	3	2		1	5	5	5	5	5	25	2
R1047	male	27	130	90	178	79	24.9337	93.7	99.2	0.944556	5.6	2.04	1.15	9.85	2.28747	3	1	1	1	5	5	5	5	4	24	2
R1054	male	38	142	90	166	84.5	30.6648	95.3	94	1.01383	12.7	2.42	1.28	10.4	2.34181	2	1	1	1	3	5	5	5	5	23	2
R1056	male	32	110	80	172.6	84	28.1967	94.6	99	0.955556	5.7	1.64	1.54	13.77	2.62249	3	2		1	4	4	4	4	4	20	1
R1057	male	34	110	80	164	75	27.8852	87.5	93	0.94086	5.6	0.68	1.12	15.04	2.71071	2	1	1	1	3	4	3	4	4	18	1
R1058	male	47	132	80	167.7	56	19.9123	71	85.5	0.830409	5.8	0.75	1.08	15.41	2.73502	3	1	1	2	3	5	5	5	5	23	2
R1059	male	36	120	80	174.6	78	25.5862	87.8	96.8	0.907025	5.1	0.87	1.59	9.25	2.22462	3	1	1	1	3	1	5	5	4	18	1
R1061	male	25	110	70	165	60	22.0386	75.2	84	0.895238	5.3	0.82	1.86	15.35	2.73112	3	2		1	3	5	5	5	5	23	2
R1064	male	28	120	70	164.5	56	20.6946	68	82	0.829268	5.2	0.67	1.66	13.66	2.61447	2	1	1	1	3	4	4	5	5	21	1
R1065	male	39	110	64	167.6	67.5	24.0301	87.4	89.2	0.979821	5.8	5.21	0.96	9.76	2.27829	3	1	1	1	4	4	5	5	5	23	2
R1067	male	32	128	86	172.8	54.5	18.2519	70.5	84	0.839286	6.3	0.95	1.37	12.4	2.5177	3	1	1	1	5	5	5	5	5	25	2
R1069	male	35	108	80	167.2	69	24.6818	79.4	96	0.827083	6.1	0.83	1.29	14.29	2.65956	2	1	1	1	5	5	5	5	5	25	2
R1070	male	34	140	100	172.4	85	28.5986	96.3	103.5	0.930435	5.7	1.7	0.95	12.42	2.51931	2	1	1	2	5	5	5	5	5	25	2
R1071	male	40	130	70	170	64	22.1453	77.9	89	0.875281	4.9	1.11	1.03	13.92	2.63333	3	1	1	1	3	1	1	5	1	11	1
R1074	male	31	130	80	155.7	61	25.1624	82.5	94.2	0.875796	5.2	0.74	1.23	12.75	2.54553	3	1	1	1	5	5	5	5	5	25	2
R1076	male	24	110	70	170.2	56	19.3316	71	85	0.835294	5.1	0.58	1.8	11.55	2.44669	3	2		1	4	4	4	5	5	22	2
R1077	male	23	120	80	173.1	71	23.6954	77	95.1	0.809674	5.1	1.13	1.09	13.85	2.62829	3	2		1	5	4	5	5	4	23	2
R1079	male	34	100	70	163.4	63	23.5959	79.1	88	0.898864	5	1.73	1.2	10.84	2.38324	2	2		1	3	5	5	5	5	23	2
R1080	male	44	120	80	163.7	73	27.2412	88.1	92.3	0.954496	5.4	1.97	1.65	13.69	2.61667	3	2		2	3	4	4	5	4	20	1
R1081	male	28	110	70	172	74	25.0135	83.7	98.3	0.851475	5.3	3.19	1.25	14.38	2.66584	3	2		1	5	5	5	5	4	24	2
R1082	male	29	120	80	178.4	77	24.1936	82.3	97	0.848454	5.1	0.53	1.22	12.99	2.56418	3	1	1	1	5	5	5	5	5	25	2
R1083	male	38	120	80	174	85	28.075	100.2	102.7	0.975657	5.5	1.33	1.07	14.53	2.67622	3	2		1	5	5	5	5	5	25	2
R1084	male	41	110	80	160.6	55	21.3241	66.8	84	0.795238	5.4	0.92	1.47	16.02	2.77384	2	1	1	1	3	1	1	5	5	15	1
R1085	male	38	100	70	168	63	22.3214	82	90	0.911111	5.4	1.82	1.23	13.07	2.57032	2	1	1	2	5	4	5	5	5	24	2
R1086	male	37	100	70	166.6	78	28.1025	95.2	101.1	0.941642	4.1	1.12	1.28	12.86	2.55412	3	1	1	1	3	4	4	5	5	21	1
R1087	male	24	120	80	172.7	80.5	26.9905	88	93	0.946237	5	1.37	0.98	13.13	2.5749	3	1	1	1	3	4	5	5	4	21	1
R1090	male	28	120	80	172.1	92.5	31.2306	94.5	106.8	0.884831	5.3	1.82	1.39	12.7	2.5416	3	1	1	1	3	4	3	5	2	17	1
R1092	male	30	106	60	162	72	27.4348	84	94	0.893617	9.8	5.88	0.84	12.51	2.52653	2	1	1	2	5	0	0	0	0	5	1
R1094	male	27	120	80	169	54	18.9069	68.6	83	0.826506	5.1	1.99	1.41	11.1	2.40695	3	1	1	1	3	4	4	4	5	20	1
R1097	male	34	120	85	165.7	64	23.3096	80.9	88	0.919318	5.4	0.87	1.23	14.53	2.67622	3	1	2	1	4	5	5	5	5	24	2
R1100	male	28	140	95	161.6	78	29.8684	91	96.5	0.943005	4.7	0.66	1.6	10.21	2.32337	3	1	1	1	4	5	5	5	5	24	2
R1104	male	29	136	90	181.1	76.5	23.3252	80.2	96.8	0.828512	5.2	1.41	1.38	11.92	2.47822	3	1	1	1	4	4	5	5	5	23	2
R1105	male	24	130	90	163.5	54.5	20.3874	69.1	86.7	0.797001	4.8	0.64	1.22	12.95	2.5611	3	2		1	5	5	3	5	5	23	2
R1107	male	34	100	64	169.1	50	17.4857	62	78.6	0.788804	4.7	0.5	1.48	16.35	2.79423	3	2		2	3	4	5	5	2	19	1
R1109	male	21	110	75	178.5	58	18.2034	72.9	82	0.889024	5	0.29	1.43	13.83	2.62684	3	1	1	1	5	3	3	5	3	19	1
R1110	male	22	120	88	164	56	20.8209	71.3	86	0.82907	5	1.07	2.03	13.24	2.58324	3	2		1	5	5	5	5	5	25	2
R1111	male	31	105	70	154.5	57	23.8791	77	84	0.916667	4.6	2.07	1.41	9.73	2.27521	3	2		1	3	3	3	5	3	17	1
R1113	male	27	120	80	168.3	72	25.4193	83.1	92	0.903261	4.6	0.93	1.55	13.12	2.57414	3	2		1	5	5	5	5	5	25	2
R1114	male	20	100	65	176.1	57	18.3805	68.1	84	0.810714	4.6	0.39	1.72	14.46	2.67139	3	1	1	1	4	5	5	5	4	23	2
R1115	male	30	120	90	159.7	56.5	22.1533	80.2	86.8	0.923963	4.7	2.17	1.19	15.27	2.72589	3	2		2	3	3	3	5	4	18	1
R1116	male	34	140	90	164.5	86.5	31.9657	102.3	102	1.00294	5.8	5.14	0.99	15.14	2.71734	3	2		1	3	5	5	5	5	23	2
R1118	male	30	120	80	176.3	64	20.5909	74.3	93.1	0.798067	4.5	0.73	1.64	14.26	2.65746	3	1	1	1	3	4	4	4	3	18	1
R1121	male	35	100	66	164.6	63	23.2531	83	88.7	0.935738	4.8	1.32	1.4	12.08	2.49155	3	2		1	5	5	5	5	5	25	2
R1124	male	34	120	80	165.8	51.5	18.7343	69.8	84.7	0.824085	5	0.55	1.46	10.21	2.32337	3	1	1	1	4	5	5	5	5	24	2
R1125	male	34	110	70	169.1	61	21.3325	73.1	89.4	0.817673	4.6	1.04	1.08	14.3	2.66026	3	1	1	2	3	5	5	5	3	21	1
R1126	male	35	85	60	165.8	68.5	24.9185	91	96	0.947917	5	1.37	1.37	13.69	2.61667	3	2		1	2	3	2	4	4	15	1
R1127	male	41	108	70	175.4	58	18.8525	76	90.3	0.841639	5.2	1.98	1.1	13.99	2.63834	3	2		1	3	5	4	5	4	21	1
R1128	male	37	130	85	170.2	65.5	22.6111	81	91	0.89011	4.5	0.87	1.38	11.92	2.47822	2	2		1	3	4	4	5	4	20	1
R1132	male	35	130	85	179.2	61	18.9956	73.6	86	0.855814	4.7	1.08	1.17	14.35	2.66375	2	2		1	4	5	5	5	5	24	2
R1133	male	22	120	80	163.5	50.5	18.891	66	85	0.776471	4.5	1.19	1.85	12.12	2.49486	3	1	1	1	4	4	5	5	4	22	2
R1134	male	26	118	70	167.5	70.5	25.1281	87.1	95.5	0.912042	4.4	0.94	1.86	10.24	2.3263	3	2		1	4	5	5	4	4	22	2
R1136	male	21	120	75	166.1	63.5	23.0162	75.6	91.4	0.827133	4.3	2.16	1.24	13.93	2.63404	3	1	1	2	3	5	5	5	4	22	2
R1137	male	21	120	80	165.6	57.5	20.9675	75.9	87	0.872414	5	1	1.37	14.34	2.66305	3	1	1	1	4	5	5	4	4	22	2
R1138	male	33	100	60	174.1	67	22.1043	79.8	93.8	0.850746	4.8	1.08	1.02	14.43	2.66931	3	2		1	5	5	5	5	5	25	2
R1139	male	34	138	90	178.2	102	32.1207	100.8	105.8	0.952741	8.4	28.5	4.94	12.12	2.49486	3	1	1	2	4	4	4	5	4	21	1
R1140	male	24	110	86	172	65.5	22.1403	79.3	89.5	0.886034	4.2	1.45	1.3	13.141	2.57574	2	1	1	1	3	2	2	0	0	7	1
R1142	male	38	120	80	162.6	57	21.5593	75.5	85.6	0.882009	4.7	0.63	1.55	15.56	2.7447	2	2		1	3	2	5	4	5	19	1
R1143	male	30	130	80	170.6	56.5	19.4129	73.7	85	0.867059	4.5	0.97	1.25	15.01	2.70872	2	2		1	3	5	5	5	4	22	2
R1146	male	23	110	70	169.5	53.5	18.6215	69.4	83	0.836145	5	0.53	1.14	14.2	2.65324	2	2		1	3	4	4	5	5	21	1
R1147	male	27	90	64	164.2	55.5	20.5848	70.5	86.2	0.817865	4.5	0.84	1.54	12.57	2.53131	2	1	1	1	1	1	1	1	1	5	1
R1148	male	27	102	70	158.5	51	20.3007	70.7	83.2	0.84976	4.5	1.65	1.11	12.88	2.55568	2	1	1	1	3	0	5	5	5	18	1
R1149	male	39	130	70	172.3	85	28.6318	96.4	101.3	0.951629	6.4	7.01	1.02	15.31	2.72851	3	1	1	1	3	4	4	4	4	19	1
R1152	male	30	120	70	157.5	64	25.7999	83	89	0.932584	6.4	3.61	1.08	12.37	2.51527	3	2		2	3	5	5	5	3	21	1
R1153	male	29	120	80	170.6	67.5	23.1924	72.7	87	0.835632	5.2	0.94	1.55	10.47	2.34851	3	2		2	5	5	5	5	5	25	2
R1154	male	32	110	80	173	61.5	20.5486	71	88.2	0.804989	4.7	0.52	1.24	10.69	2.36931	3	1	1	2	3	4	4	5	4	20	1
R1155	male	22	130	70	175	51.5	16.8163	64.2	83.2	0.771635	5.3	1.05	1.57	14.05	2.64262	3	1	1	1	5	5	5	5	5	25	2
R1156	male	30	100	70	170.5	66.5	22.8756	74.2	93	0.797849	5.3	0.6	1.28	12.81	2.55023	3	2		2	3	3	4	5	4	19	1
R1157	male	35	120	80	164.2	63	23.3665	78.2	92	0.85	5.4	1.04	1.16	10.99	2.39699	2	1	1	1	3	2	3	4	2	14	1
R1161	male	40	110	70	164.5	64.5	23.8357	81.8	93	0.87957	5.1	1.51	1.02	10.08	2.31055	3	1	1	1	3	5	5	5	5	23	2
R1162	male	40	110	70	170	59.5	20.5882	70	88	0.795455	5	0.66	1.34	14.76	2.69192	3	1	1	1	4	5	5	5	5	24	2
R1164	male	41	120	80	161	61	23.533	77.4	91	0.850549	6.7	2.69	1.2	11.98	2.48324	3	1	1	1	5	5	5	5	4	24	2
R1165	male	36	120	80	158	68	27.2392	82.3	94.1	0.874601	5	1.08	1.42	13.91	2.63261	3	1	1	1	3	3	3	3	3	15	1
R1167	male	31	110	70	159.4	54.5	21.4496	69.2	85	0.814118	5.3	0.72	1.13	15.22	2.72261	3	2		1	5	5	5	5	5	25	2
R1168	male	22	120	80	164.6	55	20.3003	70	86	0.813953	5.3	0.91	1.33	11.59	2.45014	3	1	1	1	4	4	4	5	5	22	2
R1169	male	22	120	80	167.8	63	22.3747	78.7	87.1	0.903559	5.4	0.67	1.08	15.23	2.72327	3	1	1	1	4	5	2	5	5	21	1
R117	male	35	110	60	162	54	20.5761	75.3	85.4	0.881733	5.4	1.78	1.4	15.37	2.73242	3	1	1	1	3	4	5	5	4	21	1
R1171	male	22	104	60	169.7	56	19.4457	68.2	86.7	0.786621	4.6	0.31	1.62	14.25	2.65676	3	2		1	3	4	4	4	5	20	1
R1176	male	28	106	70	174.9	58.5	19.1239	69	86	0.802326	5.5	0.98	1.56	14.46	2.67139	3	2		1	3	2	2	3	3	13	1
R1177	male	27	100	70	171.7	75	25.4402	81	96	0.84375	4.6	1.4	1.3	11.51	2.44322	3	1	1	1	3	5	5	5	5	23	2
R1178	male	22	120	80	156	63	25.8876	87	86.6	1.00462	6.3	1.79	1.21	10.48	2.34947	3	1	1	1	3	3	3	5	4	18	1
R1182	male	25	126	70	172	57	19.2672	70.5	87	0.810345	6	0.75	1.41	11.08	2.40514	3	2		1	5	5	5	5	5	25	2
R1185	male	40	120	70	168.2	61	21.5614	69	90	0.766667	5	1.46	1.04	12.77	2.5471	2	2		1	4	5	5	5	5	24	2
R1188	male	23	120	80	166	48	17.4191	67.2	84	0.8	5.7	0.9	2.01	11.24	2.41948	3	1	1	1	4	4	5	5	5	23	2
R1190	male	25	112	78	175.7	63	20.4078	78.5	90.5	0.867403	5.2	0.58	1.24	13.36	2.59227	2	2		1	4	5	4	5	5	23	2
R1192	male	34	120	82	163.5	50	18.704	61	80.6	0.756824	4.9	0.85	1.94	14.1	2.64617	3	2		1	4	5	5	5	5	24	2
R1194	male	41	150	92	183.5	90	26.7282	98	104	0.942308	5.3	2.96	1	15.25	2.72458	3	2		1	2	3	4	3	3	15	1
R1195	male	26	120	80	168	51	18.0697	63.5	82.3	0.771567	6.4	0.78	2.12	13.76	2.62177	3	1	1	1	4	5	5	5	4	23	2
R1198	male	28	120	80	167	65	23.3067	76	92.5	0.821622	5.7	1.15	1.26	12.74	2.54475	2	1	1	1	4	4	4	5	1	18	1
R1199	male	27	120	70	170.5	75	25.7996	91.5	96	0.953125	5.5	1.17	1.16	9.48	2.24918	3	1	1	1	4	4	4	5	5	22	2
R1201	male	27	130	80	157.7	58	23.3219	75.3	87.8	0.857631	5.5	1.71	1.54	7.99	2.07819	3	1	1	1	4	4	4	5	4	21	1
R1202	male	30	120	80	169.7	68.5	23.7863	75	87	0.862069	3.5	0.67	1.77	12.86	2.55412	3	1	1	1	4	4	5	5	4	22	2
R1204	male	42	100	60	172.3	58	19.537	70	85	0.823529	4.9	0.69	1.32	10.76	2.37584	2	1	1	1	3	3	3	3	3	15	1
R1237	male	43	110	80	163.5	67.5	25.2504	81.5	91	0.895604	5.2	4.1	1.32	11.27	2.42214	2	1	1	1	5	5	5	5	5	25	2
R1241	male	35	100	60	173.9	73.5	24.3046	85.8	96.1	0.89282	4.7	0.6	1.39	11.35	2.42922	3	1	1	1	3	3	4	4	4	18	1
R1242	male	34	104	60	164	52	19.3337	70	85	0.823529	5.7	0.82	1.91	13.73	2.61958	1	1	1	1	3	4	4	4	3	18	1
R1243	male	40	120	70	161	53.5	20.6396	69	82.3	0.838396	5.1	0.52	1.49	13.02	2.56649	2	1	1	1	3	5	5	5	5	23	2
R1244	male	29	100	74	165	51	18.7328	73	79	0.924051	5.3	0.57	1.65	13.87	2.62973	3	2		1	4	5	5	5	5	24	2
R1245	male	35	100	60	160.5	55	21.3507	72	84	0.857143	5.8	0.97	1.92	12.22	2.50307	3	1	1	1	3	2	2	5	5	17	1
R1247	male	36	100	70	162.1	61	23.2147	78	90	0.866667	5.7	1.49	1.45	12.42	2.51931	3	1	1	1	3	3	4	5	4	19	1
R1249	male	38	110	70	162.2	63.5	24.1364	85	90.5	0.939227	6	1.18	1.31	14.17	2.65113	2	1	1	1	3	5	2	5	5	20	1
R125	male	59	110	78	178.2	92	28.9716	107.7	104.6	1.02964	5.7	1.25	1.54	14.02	2.64048	3	1	1	1	4	4	4	5	4	21	1
R1250	male	29	120	80	170.6	58	19.9283	69.2	86.5	0.8	6	0.62	1.32	16.11	2.77944	3	2		1	3	3	3	3	3	15	1
R1251	male	25	124	70	162	50	19.052	68	78.5	0.866242	5.4	0.78	1.62	11.71	2.46044	3	2		1	5	0	0	0	0	5	1
R1252	male	34	122	82	176.6	80	25.6513	89.8	98.3	0.91353	6.1	1.89	1.37	14.25	2.65676	2	2		2	2	3	4	3	3	15	1
R1253	male	25	124	90	180.5	73.5	22.5597	84.5	97	0.871134	6	2.62	1.36	13.32	2.58927	3	1	1	1	5	5	5	5	4	24	2
R1258	male	32	100	80	164	58.5	21.7504	72	85.6	0.841121	5.9	3	1.19	9.97	2.29958	3	1	1	1	4	4	5	5	4	22	2
R1259	male	36	110	80	167	63	22.5896	81.5	88	0.926136	5.4	2.17	1.23	11.82	2.46979	3	2		1	3	5	4	5	4	21	1
R1261	male	35	110	70	156.7	51	20.7698	67	80.8	0.829208	5.8	0.69	1.19	11.23	2.41859	3	1	1	1	3	2	2	5	5	17	1
R1263	male	29	120	80	161.5	49	18.7867	60.5	81	0.746914	5.8	0.48	1.71	10.02	2.30458	2	1	1	2	4	2	2	5	2	15	1
R1266	male	29	110	66	164.2	65.5	24.2938	83	94	0.882979	5.8	1.73	1.06	10.5	2.35138	3	1	1	1	3	4	5	5	5	22	2
R1267	male	22	140	80	179.4	80.5	25.0121	86.1	100.6	0.855865	5.3	1.98	1.15	13.73	2.61958	3	1	1	1	1	1	2	3	2	9	1
R1268	male	28	110	70	165.8	51	18.5524	68.2	83.2	0.819712	6.1	0.79	1.11	11.57	2.44842	2	1	1	1	4	5	4	5	3	21	1
R127	male	56	90	70	169.5	57	19.8397	73.5	87.3	0.841924	4.6	0.79	1.55	14	2.63906	3	2		2	2	3	2	3	3	13	1
R1276	male	53	100	70	164.1	57	21.1669	69	86	0.802326	5.5	1.22	1.15	15.33	2.72981	2	2		1	3	5	5	5	4	22	2
R1277	male	47	130	80	158.5	49.5	19.7036	66.5	80.2	0.829177	5.6	0.67	1.55	13.64	2.61301	3	1	1	1	3	5	4	5	4	21	1
R1292	male	35	100	66	165.2	61	22.3517	70	87.6	0.799087	5	1.19	1.32	12.52	2.52733	2	1	1	1	3	5	5	4	5	22	2
R1295	male	36	100	80	164.2	67.5	25.0356	89.5	95.8	0.934238	5.5	1.47	1.14	12.35	2.51366	3	2		2	4	5	5	5	4	23	2
R1296	male	25	118	80	172.7	66.5	22.2965	76.7	95.2	0.805672	4.3	0.78	1.62	12.98	2.56341	3	2		1	3	3	3	4	3	16	1
R1297	male	31	110	80	153.3	75	31.9137	92.9	99.1	0.937437	5.5	2.59	1.11	12.16	2.49815	3	1	1	1	3	2	2	4	3	14	1
R1299	male	33	120	94	172.5	80.5	27.0531	90.9	97.7	0.930399	6.8	4.24	1.56	16.48	2.80215	3	2		1	3	3	3	3	3	15	1
R1300	male	42	120	80	169.1	75	26.2285	91	98.3	0.925738	4.6	1.13	1.36	12.83	2.55179	3	2		1	3	5	5	5	5	23	2
R1301	male	35	140	90	161	71.5	27.5838	83.2	94.3	0.882291	5.2	2.05	0.96	10.57	2.35802	2	1	1	1	3	4	4	5	5	21	1
R1302	male	33	110	80	171.1	58	19.812	74.5	86.7	0.859285	6.3	1.25	1.12	12.34	2.51285	3	1	1	1	2	4	4	5	4	19	1
R1304	male	37	90	60	172.2	58.5	19.7283	72	89.2	0.807175	4.7	0.7	1.67	16.54	2.80578	2	1	1	1	3	5	4	5	5	22	2
R1305	male	35	120	70	166.8	60	21.5655	78.3	90.7	0.863286	5.6	1.46	1.02	15.3	2.72785	2	1	1	1	3	3	2	0	0	8	1
R1306	male	34	100	80	161	56.5	21.797	73.5	88	0.835227	5.5	1.63	1.13	13.16	2.57718	2	1	1	1	3	4	4	5	4	20	1
R1307	male	36	110	78	174.9	77	25.1716	91.6	97	0.94433	5.2	1.01	1.15	16.18	2.78378	3	2		2	4	5	5	5	5	24	2
R131	male	35	110	80	176	62	20.0155	72.5	82.6	0.877724	4.8	1.09	1.79	14.27	2.65816	3	1	1	1	4	5	5	5	4	23	2
R1310	male	24	120	90	173.7	65.5	21.7091	73.5	91.3	0.805038	5.7	0.39	1.6	15.71	2.7543	3	2		1	5	5	5	5	5	25	2
R1311	male	31	110	76	163	73	27.4756	86.7	95.5	0.907853	4.9	0.64	1.11	13.04	2.56802	3	1	1	2	5	5	5	5	5	25	2
R1312	male	26	110	74	160.6	52.5	20.3549	70.5	85.5	0.824561	4.9	0.81	1.6	15.8	2.76001	3	1	1	1	4	5	5	5	4	23	2
R1318	male	22	100	70	172.1	57.5	19.4136	69.2	88	0.786364	4.9	0.56	1.33	15.4	2.73437	3	2		1	5	5	5	5	5	25	2
R1320	male	26	90	60	163.6	52.5	19.6152	69.5	84	0.827381	5.4	0.99	1.51	10.23	2.32532	3	1	1	1	5	5	5	5	4	24	2
R1325	male	32	110	80	160.1	71	27.6997	83.7	95.3	0.878279	5.5	1.11	1.57	12.99	2.56418	3	1	1	1	5	5	5	5	5	25	2
R1326	male	29	110	60	157	53	21.5019	71	85.5	0.830409	5.1	0.41	1.52	13.41	2.596	3	1	1	1	4	4	3	3	3	17	1
R1328	male	23	120	70	170.2	69.5	23.992	82	93.2	0.879828	5.4	0.76	1.28	14.82	2.69598	3	1	1	1	4	4	4	5	3	20	1
R133	male	28	104	68	176.7	74.7	23.9248	85.2	97.3	0.875642	5.1	1.07	1.32	13.23	2.58249	3	2		1	5	5	5	5	5	25	2
R1330	male	24	100	60	157	43.5	17.6478	63	78	0.807692	5.2	1.04	1.41	11.48	2.44061	3	1	1	1	4	5	5	4	4	22	2
R1331	male	26	120	80	167.5	52	18.5342	68.1	85	0.801176	4.8	0.78	1.35	13.54	2.60565	3	2		1	5	5	5	5	5	25	2
R1333	male	22	110	60	160	50	19.5312	64	84	0.761905	5.6	0.42	1.48	10.77	2.37676	3	1	1	1	3	4	4	5	4	20	1
R1335	male	39	120	80	164.1	58	21.5383	75.5	88	0.857955	5	1.92	1.43	15.57	2.74535	3	1	1	2	5	5	5	5	5	25	2
R1336	male	28	100	60	173.1	57	19.0231	70.5	87.7	0.803877	4.5	0.81	1.32	15.03	2.71005	3	1	1	1	3	5	5	5	5	23	2
R1337	male	39	100	60	170.5	58.5	20.1237	71	86.8	0.817972	5.3	1.69	1.27	14.37	2.66514	2	1	1	2	3	1	4	5	4	17	1
R1340	male	31	110	80	166.2	63.5	22.9886	73.6	91	0.808791	5.4	2.16	1.14	16.16	2.78254	2	1	1	1	4	5	5	5	5	24	2
R1341	male	31	130	90	165.7	54.5	19.8496	74	86	0.860465	5.8	1.13	1.44	13.66	2.61447	3	2		2	2	4	4	3	2	15	1
R1342	male	35	130	70	171	74	25.3069	85.5	95.5	0.895288	6.5	1.03	1.14	14.12	2.64759	3	2		1	4	4	5	5	5	23	2
R1343	male	40	100	60	168.3	59	20.8297	73.7	89	0.82809	4.9	1.13	1.52	14.14	2.64901	2	2		1	2	2	1	4	3	12	1
R1346	male	32	120	80	165	70	25.7117	89	92.5	0.962162	5.6	1.23	1.02	13.82	2.62612	3	1	1	1	4	2	3	5	3	17	1
R1347	male	22	100	60	166	72	26.1286	80.1	95.8	0.836117	5.2	2.27	1.2	9.23	2.22246	3	1	1	2	4	4	4	5	5	22	2
R135	male	29	110	80	174.1	75	24.7436	80	94	0.851064	5.1	1.32	1.45	12.67	2.53924	2	1	1	1	5	5	5	5	5	25	2
R1354	male	29	110	70	167.2	55	19.6739	72	83	0.86747	4.7	0.58	1.15	10.3	2.33214	3	1	1	1	3	4	5	5	5	22	2
R1371	male	45	120	78	167.5	65	23.1677	83	95	0.873684	5.3	0.57	1.52	15.99	2.77196	2	2		2	3	5	5	5	5	23	2
R1372	male	46	110	70	165.7	78	28.4086	99	90	1.1	5.7	1.28	1.41	12.25	2.50553	2	1	1	2	3	4	4	5	5	21	1
R1384	male	49	110	70	167.5	66.5	23.7024	78.5	94	0.835106	5.2	1.93	1.35	10.14	2.31649	3	1	1	1	3	3	3	3	4	16	1
R1394	male	28	102	72	171	63	21.5451	71	87	0.816092	5	0.64	1.38	13.55	2.60639	3	2		1	2	3	4	4	4	17	1
R1395	male	37	110	80	174	58	19.1571	74	82.8	0.89372	5.2	0.55	1.85	13.32	2.58927	3	1	1	1	3	5	5	5	4	22	2
R143	male	33	120	80	172	61	20.6193	72.6	88	0.825	5.3	0.89	1.07	11.45	2.43799	2	2		2	5	5	5	5	5	25	2
R1431	male	29	120	80	171	66	22.571	81.7	92.3	0.885157	5.2	1.17	1.27	12.24	2.50471	3	1	1	1	4	5	5	5	5	24	2
R1434	male	26	140	88	169.8	87.5	30.3482	92.2	101.9	0.904809	5.1	4.44	1.14	12.17	2.49897	3	2		1	5	5	5	5	5	25	2
R1449	male	41	110	84	159.7	64.5	25.2901	77	93.2	0.82618	5.3	0.69	1.08	10.18	2.32043	3	1	1	1	2	5	0	4	5	16	1
R145	male	45	100	70	167.8	70	24.8607	83	94.3	0.88017	4.2	0.74	1.43	14.54	2.6769	3	1	1	1	3	5	5	5	0	18	1
R1458	male	42	120	80	167	72	25.8166	87.3	98.1	0.889908	5.5	0.61	1.04	10.9	2.38876	3	2		1	3	4	5	5	5	22	2
R1459	male	49	150	88	170	56.5	19.5502	73.6	86.2	0.853828	5.1	0.73	1.77	10.29	2.33117	3	1	1	1	3	4	5	5	5	22	2
R147	male	30	110	80	173.4	70	23.2809	80.2	95.6	0.838912	3.7	0.99	1.58	12.46	2.52252	3	2		1	5	5	5	5	4	24	2
R1493	male	38	120	84	170	71.5	24.7405	83.6	94	0.889362	5.5	2.25	1.55	14.87	2.69935	2	1	2	1	3	4	4	5	4	20	1
R1503	male	58	140	90	164.1	56.5	20.9812	67.8	87.8	0.77221	6.6	0.84	1.85	16.14	2.7813	2	2		1	3	2	4	5	4	18	1
R152	male	48	130	80	176	62	20.0155	72.8	90.8	0.801762	5.4	0.87	1.35	14.05	2.64262	2	1	1	1	3	4	4	4	4	19	1
R1550	male	24	120	70	166.5	52	18.7575	67.5	81	0.833333	5.2	0.79	1.95	11.61	2.45187	3	1	1	1	5	5	5	5	5	25	2
R1551	male	22	110	70	181.6	63.5	19.2549	70	95	0.736842	4.8	0.62	1.42	11.02	2.39971	3	1	1	1	5	5	5	5	5	25	2
R156	male	41	130	92	175	80	26.1224	93.7	99.6	0.940763	5	2.7	0.98	9.43	2.2439	3	1	1	1	4	5	5	5	5	24	2
R1573	male	21	100	66	161.7	47	17.9754	68.6	82.1	0.835566	5.4	1.01	1.38	13.28	2.58626	3	2		2	3	5	5	5	4	22	2
R1574	male	38	112	80	165.6	67	24.4317	83.6	97.8	0.854806	4.8	1.94	1.2	14.16	2.65042	2	1	1	1	1	2	2	5	4	14	1
R1578	male	31	100	70	171	67	22.913	82.5	89.5	0.921788	5.1	1.02	1.08	12.88	2.55568	3	1	1	1	2	3	3	3	2	13	1
R1579	male	25	120	80	160.2	61	23.7687	85	85.5	0.994152	6.3	1.22	1.32	10.99	2.39699	3	2		1	5	4	0	0	0	9	1
R1581	male	28	130	98	167	73.5	26.3545	84.8	92	0.921739	5.5	3.93	1.03	13.84	2.62756	3	2		1	5	5	5	5	5	25	2
R1593	male	31	120	72	174.2	74	24.3857	92.5	96.5	0.958549	5.7	0.98	1.58	10.02	2.30458	3	2		1	3	5	5	5	4	22	2
R16	male	31	130	90	174.2	111.5	36.7433	109.3	110.4	0.990036	5.4	2.24	1.69	10.59	2.35991	3	1	1	1	5	5	5	5	5	25	2
R1610	male	26	120	80	163.1	61.5	23.1189	74.5	90.5	0.823204	4.5	1.39	1.21	13.93	2.63404	3	2		1	5	5	4	5	4	23	2
R1611	male	32	100	70	167.5	52.5	18.7124	65.5	82.5	0.793939	5.2	0.62	1.39	14.09	2.64547	3	1	1	1	5	5	5	5	5	25	2
R1612	male	25	90	60	164	68	25.2826	84.6	89.3	0.947368	4.8	0.74	1.37	9.35	2.23538	3	2		1	5	5	4	5	5	24	2
R1614	male	26	104	60	164.1	56.5	20.9812	68.5	86	0.796512	5.4	1.52	1.65	13.4	2.59525	3	1	1	1	4	4	2	5	4	19	1
R1615	male	41	120	80	163	64	24.0882	84.6	90	0.94	5.2	1.24	1.35	13.34	2.59077	3	2		1	4	4	5	5	5	23	2
R1619	male	37	120	90	152	69	29.865	92.8	93.5	0.992513	5	1.32	1.28	11.96	2.48157	3	1	1	2	3	5	5	5	4	22	2
R1621	male	37	130	90	173.7	100	33.1437	99.8	109	0.915596	5	1.63	1.25	16.22	2.78625	3	1	1	1	5	5	5	5	5	25	2
R1622	male	35	100	60	164.7	53.5	19.7227	77.8	85	0.915294	4.6	0.76	1.19	13.92	2.63333	3	1	1	1	3	5	5	5	5	23	2
R1624	male	28	110	78	166.7	47	16.9132	66.7	84	0.794048	5.2	0.78	1.85	14.5	2.67415	3	1	1	1	3	3	4	5	4	19	1
R1628	male	30	126	86	168.5	61	21.4847	76	86.5	0.878613	5	0.66	1.74	13.83	2.62684	3	2		1	5	5	5	5	4	24	2
R163	male	32	122	76	168.7	77	27.0558	93	99	0.939394	5.8	3.41	1.06	10	2.30259	3	1	1	1	4	4	4	4	2	18	1
R1630	male	25	110	70	167.2	69	24.6818	79.8	93	0.858065	5	1.12	1.2	13.52	2.60417	3	1	1	2	4	5	5	5	5	24	2
R1631	male	28	100	70	165	53.5	19.6511	72.1	83	0.868675	5.1	1.1	1.54	15.3	2.72785	3	1	2	1	3	5	5	5	3	21	1
R1637	male	27	110	68	163	49.5	18.6307	63.5	79.5	0.798742	5	0.71	1.99	12.07	2.49072	3	2		1	5	5	5	5	5	25	2
R1638	male	25	100	60	168.5	70	24.6546	84	96.5	0.870466	4.7	1.62	1.64	16.6	2.8094	3	2		1	3	3	3	5	3	17	1
R164	male	25	110	70	166.5	72	25.9719	87.5	94	0.930851	6.4	3.48	1.2	10.79	2.37862	3	2		2	3	4	4	5	5	21	1
R1640	male	40	110	70	167.5	52	18.5342	71.1	82.6	0.860775	4.9	0.65	2.16	11.86	2.47317	3	1	1	1	4	4	4	4	4	20	1
R1642	male	24	108	70	183.5	61.5	18.2643	81.2	88	0.922727	5.6	0.71	1	12.73	2.54396	3	1	1	2	3	3	4	4	4	18	1
R1646	male	34	120	80	160.2	72	28.0548	93.2	100	0.932	5.4	1	1.32	15.1	2.71469	2	1	1	1	4	5	4	5	5	23	2
R1647	male	28	100	60	158.2	44	17.5808	65.5	81	0.808642	5.2	0.62	1.59	15.59	2.74663	3	2		2	4	5	5	5	5	24	2
R1648	male	33	110	70	171.3	74.5	25.3888	88.8	96.7	0.918304	4.9	1.9	1.54	14.84	2.69733	3	2		1	3	5	4	5	5	22	2
R1650	male	22	130	84	173.2	62.5	20.8346	72.5	88.5	0.819209	4.7	0.94	1.2	13.24	2.58324	2	2		1	4	5	4	5	5	23	2
R1651	male	37	120	76	163.2	62.5	23.466	79.5	91	0.873626	5.4	1.31	1.55	14.26	2.65746	3	2		1	5	5	5	4	0	19	1
R1653	male	34	122	70	162.5	74	28.0237	91.3	97	0.941237	5.1	0.91	1.27	15.85	2.76317	2	2		1	3	1	4	5	4	17	1
R1655	male	33	120	70	178.5	80.5	25.265	88	99	0.888889	5.6	2.97	1.23	13.92	2.63333	2	1	1	1	5	5	5	5	5	25	2
R1656	male	39	120	80	160.3	57.5	22.3769	78	90	0.866667	6.1	0.68	1.49	11.43	2.43624	3	1	1	1	3	5	4	4	4	20	1
R1657	male	23	110	70	164.2	60.5	22.4393	75.2	91	0.826374	4.6	1.13	1.79	13.06	2.56955	3	1	1	1	4	4	4	4	4	20	1
R1658	male	32	110	70	167.8	61.5	21.8419	75.2	89.5	0.840223	5.3	1.79	1.52	13.83	2.62684	3	1	1	2	5	5	5	5	5	25	2
R1660	male	31	140	80	168.2	64	22.6218	78.5	90.5	0.867403	4.7	0.97	1.25	15.95	2.76946	2	1	2	1	4	5	4	5	4	22	2
R1661	male	24	110	80	169	56.5	19.7822	68.2	85.8	0.794872	5.1	0.82	1.47	16.39	2.79667	3	1	1	1	2	3	3	3	3	14	1
R1662	male	34	110	70	160.5	69	26.7855	83.2	92.5	0.899459	5.4	1.99	1.28	16.09	2.7782	3	2		1	4	4	4	5	4	21	1
R1664	male	33	130	70	171.5	74	25.1596	84.6	96.2	0.879418	6.5	2.43	1.59	11.94	2.47989	3	2		1	5	5	4	5	5	24	2
R1669	male	40	120	80	162.8	77.5	29.241	95	96.6	0.983437	5.6	1.34	1.39	15.61	2.74791	3	2		2	3	5	5	5	5	23	2
R167	male	44	160	100	167.5	76.5	27.2667	90	94.7	0.95037	5.2	1.02	1.05	12.25	2.50553	3	2		1	3	5	5	5	4	22	2
R1676	male	26	140	90	176.8	116	37.1102	107	116.3	0.920034	5.1	1.53	1.25	15.96	2.77009	3	1	1	1	4	5	5	5	5	24	2
R1677	male	30	120	80	162.1	62.5	23.7856	81.2	93.5	0.868449	5	1.68	1.38	14.58	2.67965	3	1	1	1	5	5	5	5	5	25	2
R1680	male	37	110	84	165.7	70	25.4949	82.8	94.1	0.879915	5.9	1.39	1.66	11.26	2.42126	2	1	1	1	3	5	4	5	4	21	1
R1682	male	25	100	70	162.6	55	20.8028	72.3	84	0.860714	5	0.8	1.19	15.52	2.74213	2	2		2	0	0	1	5	5	11	1
R1683	male	22	120	70	163	55.5	20.889	66.8	85.3	0.783118	5.1	0.88	1.49	15.6	2.74727	3	2		1	3	2	2	3	2	12	1
R1686	male	30	110	80	172.2	82.5	27.822	87.2	96	0.908333	5	4.36	1.03	13.99	2.63834	3	1	1	1	4	4	5	5	5	23	2
R1687	male	32	120	80	173.5	60	19.9321	81	92.8	0.872845	4.9	0.64	1.4	14.84	2.69733	2	2		1	3	4	4	4	4	19	1
R1689	male	22	100	70	175.3	62	20.1757	75.5	88	0.857955	4.9	2.52	0.85	16.39	2.79667	3	2		1	5	5	5	5	4	24	2
R1690	male	25	130	88	160	62	24.2188	73	86	0.848837	5.3	0.75	1.75	15.52	2.74213	3	2		1	3	5	5	5	5	23	2
R1692	male	39	120	60	176.3	77.5	24.9343	91.4	99.3	0.920443	5.2	1.06	1.01	14.78	2.69327	3	2		1	4	4	4	5	5	22	2
R1693	male	30	100	60	171.8	52	17.618	63	82	0.768293	5.2	0.56	1.92	15.93	2.7682	3	2		1	4	5	5	5	4	23	2
R1694	male	25	110	70	158.1	60	24.0042	80	87	0.91954	5.2	4.23	1.02	12.74	2.54475	2	2		1	4	4	5	5	4	22	2
R1698	male	34	100	68	166	52	18.8707	69.3	84	0.825	4.8	1.04	2.03	15	2.70805	3	2		1	5	5	5	5	5	25	2
R1699	male	26	120	70	177.6	89	28.2166	87.6	102.8	0.85214	5.3	0.78	1.09	11.41	2.43449	3	2		1	5	5	5	5	4	24	2
R1706	male	40	114	74	163	51.5	19.3835	68.5	84.7	0.808737	5.1	0.41	2.12	14.66	2.68512	2	1	1	1	2	1	1	2	1	7	1
R1711	male	45	130	88	166.5	74.5	26.8737	87.6	97	0.903093	5.1	0.53	1.61	12.35	2.51366	1	2		1	1	3	2	2	4	12	1
R1712	male	27	100	60	173.1	60	20.0243	78	83	0.939759	5.4	0.86	1.36	11.12	2.40875	3	2		1	5	5	5	5	5	25	2
R1731	male	37	110	84	156.1	51	20.9298	67.9	85.7	0.792299	6.7	0.78	1.53	13.62	2.61154	3	2		1	3	4	5	5	5	22	2
R1744	male	44	150	100	172.6	69.5	23.3294	82	89	0.921348	5.8	0.4	1.92	11.56	2.44755	3	2		2	3	4	4	5	5	21	1
R1746	male	30	120	80	168	66	23.3844	75.1	87	0.863218	4.5	0.52	1.63	14.97	2.70605	2	2		1	4	5	5	5	4	23	2
R1747	male	37	120	70	156.5	45.5	18.5773	67	78.5	0.853503	6.4	0.5	1.96	12.16	2.49815	2	1	1	1	3	3	4	5	4	19	1
R1748	male	37	120	80	169	63	22.0581	78.8	89.2	0.883408	5.9	1.7	1.61	10.29	2.33117	3	1	1	1	4	5	5	5	3	22	2
R1749	male	47	130	70	165.6	59	21.5145	74	88.4	0.837104	5.1	1.22	1.76	14.56	2.67828	3	1	1	1	4	5	5	5	4	23	2
R1753	male	31	120	80	164.1	61	22.6523	74.2	86.8	0.854839	5.2	0.63	1.32	14.21	2.65395	3	1	1	1	5	5	5	5	5	25	2
R176	male	34	110	80	167.5	78	27.8013	93.2	96.5	0.965803	5.7	1.36	1.27	10.31	2.33311	2	1	1	1	3	5	4	5	4	21	1
R1774	male	40	90	70	167	72	25.8166	87.3	97	0.9	5.3	2.31	1.12	11.28	2.42303	3	1	1	1	5	5	5	5	5	25	2
R1788	male	21	112	70	172	60	20.2812	69.8	85	0.821176	4.9	0.76	1.31	13.12	2.57414	3	1	1	1	5	5	5	5	5	25	2
R1791	male	36	102	80	166	53.5	19.415	68	84.3	0.806643	5.3	0.39	1.83	11.61	2.45187	2	2		1	3	3	2	4	3	15	1
R1799	male	31	100	70	167.7	65	23.1125	80.6	90.5	0.890608	4.5	1.7	1.32	15.97	2.77071	2	2		1	3	2	1	4	2	12	1
R1802	male	40	120	78	163	56.5	21.2654	77.2	85.6	0.901869	5.6	0.96	1.66	10.45	2.3466	3	2		1	4	5	5	5	4	23	2
R1803	male	26	102	70	166.5	54	19.4789	71	87	0.816092	4.8	0.91	1.36	13.08	2.57108	3	2		1	3	5	0	5	5	18	1
R1804	male	23	100	60	178	60	18.937	71.2	88.5	0.80452	5.3	0.57	1.67	9.78	2.28034	2	2		1	5	5	5	5	5	25	2
R1806	male	30	120	68	174.5	83	27.2576	93	102.2	0.90998	5.2	2.41	1.19	13.98	2.63763	3	1	1	2	3	4	4	4	4	19	1
R1807	male	36	120	70	164.2	55	20.3994	71.9	85.8	0.837995	5.5	1.81	1.63	12.43	2.52011	2	1	1	1	3	3	4	5	4	19	1
R1808	male	25	130	70	168.5	60	21.1325	81	88.6	0.914221	5.1	0.9	1.41	10.13	2.3155	3	1	1	1	4	4	4	5	5	22	2
R1811	male	23	110	80	164.5	62	22.9118	69.5	89.5	0.776536	4.8	0.58	1.17	14.37	2.66514	3	1	1	1	5	2	5	5	5	22	2
R1812	male	27	130	80	170.2	76	26.2358	85.8	96.8	0.886364	5	3.46	1.12	9.49	2.25024	3	1	1	1	1	2	2	4	2	11	1
R1813	male	26	120	60	174.6	57.5	18.8616	70.3	85	0.827059	4.7	0.62	1.42	10.54	2.35518	3	2		1	4	5	5	5	4	23	2
R1814	male	34	110	70	162	48	18.2899	68.5	78.8	0.869289	5.1	0.62	2.05	11.07	2.40424	3	1	1	1	0	5	5	5	5	20	1
R1815	male	27	100	60	172.7	70	23.47	74.5	93	0.801075	5.8	1.45	1.62	13	2.56495	3	2		1	4	4	4	4	4	20	1
R1816	male	25	110	62	152.5	53.5	23.0046	67.4	85	0.792941	5	0.62	1.39	11.85	2.47233	3	2		1	3	4	4	5	4	20	1
R1817	male	34	130	90	168.6	67	23.57	72.5	89.9	0.806452	5.3	0.93	1.65	15.37	2.73242	2	2		1	3	5	5	5	5	23	2
R1818	male	31	100	70	160.4	60	23.3208	77.8	89.5	0.869274	6	1.36	1.37	14	2.63906	3	2		1	5	5	5	5	5	25	2
R1819	male	21	110	70	168.5	50	17.6104	62.6	82.5	0.758788	5	0.48	1.78	14.02	2.64048	2	2		2	4	5	5	5	4	23	2
R182	male	29	120	80	178.5	69	21.6557	86.6	95	0.911579	4.6	3.47	1.33	11.35	2.42922	3	2		1	5	5	5	5	5	25	2
R1820	male	28	120	60	177	57	18.194	67.5	85	0.794118	5.1	0.38	1.45	12.23	2.50389	3	1	1	1	4	5	5	5	4	23	2
R1823	male	39	100	60	165.5	53	19.35	71.8	81.3	0.883149	4.2	1.09	1.24	12.86	2.55412	3	1	1	1	3	4	2	4	2	15	1
R1824	male	20	120	70	169.8	60.5	20.9836	73	84.2	0.866983	4.5	0.62	1.6	11.15	2.41144	3	2		1	4	4	4	4	4	20	1
R1832	male	22	130	70	161.3	69.5	26.7126	83.6	90.5	0.923757	5.3	1.21	1.25	12.57	2.53131	3	1	1	1	3	2	2	5	2	14	1
R1833	male	30	140	80	174.2	80	26.3629	89	96.2	0.925156	5.1	1.37	1.09	16.37	2.79545	3	2		2	3	4	4	4	4	19	1
R1834	male	31	140	80	176.5	84.5	27.1248	94	103	0.912621	4.6	0.84	1.29	12.77	2.5471	3	1	1	1	3	4	4	5	4	20	1
R1835	male	23	120	70	164.8	44	16.2009	63	78.5	0.802548	4.9	0.61	2.01	16.6	2.8094	3	2		2	5	5	5	5	5	25	2
R1838	male	22	110	80	165.5	56.5	20.6278	70.8	81.5	0.868712	5.2	0.94	1.37	11.99	2.48407	3	1	1	1	4	5	5	5	5	24	2
R1840	male	25	110	90	164.5	49	18.1077	68.5	80.5	0.850932	5.4	2.06	1.46	11.28	2.42303	3	1	1	1	5	5	5	5	4	24	2
R1844	male	24	110	70	165.8	51.5	18.7343	70.8	82	0.863415	5.5	0.61	1.37	13.92	2.63333	3	2		2	3	4	5	5	5	22	2
R1845	male	42	100	60	164.7	64.5	23.7778	82.1	88.7	0.925592	5.7	0.88	1.51	15.89	2.76569	3	2		2	3	4	5	5	5	22	2
R1848	male	28	100	60	162	58	22.1003	70	87.5	0.8	5.1	0.98	1.46	14.53	2.67622	2	1	1	1	3	5	5	5	4	22	2
R1852	male	35	100	68	169	60.5	21.1827	71	88.4	0.803167	5.7	0.95	1.83	15.08	2.71337	3	2		1	3	3	3	0	4	13	1
R1853	male	29	130	80	168.7	51	17.9201	71	85	0.835294	4.8	1.12	1.66	13.23	2.58249	3	2		1	3	5	5	5	4	22	2
R1855	male	22	110	78	169.5	62	21.58	71	85.3	0.832356	5.6	0.41	1.29	14.12	2.64759	3	2		1	3	4	4	4	3	18	1
R1859	male	26	90	60	165	58	21.3039	75	85	0.882353	5	0.51	2.11	12.44	2.52092	2	2		2	3	3	3	5	3	17	1
R1862	male	32	120	80	160.6	48.5	18.804	69.6	86.7	0.802768	4.8	0.6	1.65	13.3	2.58776	3	1	1	1	5	5	5	5	4	24	2
R1864	male	42	96	64	170.5	77.5	26.6596	88.6	96.8	0.915289	5.8	1.17	1.13	13.84	2.62756	3	1	2	1	3	4	5	5	0	17	1
R1869	male	36	110	78	169.8	67	23.238	81.5	92.6	0.88013	5.1	1.05	1.9	13.86	2.62901	2	2		1	0	5	0	0	0	5	1
R187	male	34	110	80	158.3	59	23.5445	77.2	87	0.887356	5.4	0.63	1.4	15.04	2.71071	3	1	1	1	3	4	4	5	4	20	1
R1870	male	37	110	82	169	80.5	28.1853	95	98.5	0.964467	4.5	1.3	1.25	13.9	2.63189	3	2		1	3	2	2	4	2	13	1
R1881	male	52	110	60	172	60	20.2812	73.8	86	0.85814	4.5	0.73	1.85	16.06	2.77633	3	2		1	3	3	3	5	4	18	1
R1885	male	57	120	86	166.6	63	22.6982	72.3	88.7	0.815107	7	0.49	1.54	15.01	2.70872	1	1	1	1	3	3	4	4	3	17	1
R1926	male	33	120	85	164.3	70	25.9312	95	95	1	5.5	1.3	1.22	10.6	2.36085	3	1	1	1	5	5	5	5	5	25	2
R1929	male	47	125	85	175.7	73.5	23.8091	85.6	94.3	0.907741	5.7	1.14	1.28	11.65	2.45531	2	1	1	1	5	4	5	5	5	24	2
R1942	male	47	140	75	161.5	60	23.0042	73.6	87	0.845977	6.1	1.02	1.68	12.62	2.53528	3	1	1	1	3	5	5	5	5	23	2
R1945	male	30	105	75	173.8	62	20.5254	73.5	89.7	0.819398	4.8	0.59	1.41	12.32	2.51122	2	1	1	1	2	2	2	3	2	11	1
R1946	male	38	122	78	169	71	24.8591	87.1	95	0.916842	5.4	1.24	1.08	12.34	2.51285	2	2		1	3	4	4	4	3	18	1
R1961	male	32	100	70	174.6	56	18.3696	68.6	82.7	0.829504	5.2	0.58	2	10.73	2.37304	3	1	1	1	4	5	5	5	4	23	2
R1962	male	35	120	80	168.2	73	25.803	84	93	0.903226	5.8	3.31	1.03	14.74	2.69056	3	1	1	1	3	2	4	4	4	17	1
R1967	male	28	110	64	171	80	27.3588	92	99.5	0.924623	5.8	2.06	1.31	11.47	2.43973	2	1	1	1	4	5	4	5	4	22	2
R1970	male	29	120	80	167.5	62	22.0985	79	90	0.877778	5.4	1.75	1.37	15.21	2.72195	3	1	1	1	3	5	5	5	5	23	2
R1972	male	34	100	70	171	61.5	21.0321	75.5	86.2	0.87587	5.2	2.01	0.98	11.23	2.41859	2	1	1	1	2	4	3	3	3	15	1
R1976	male	28	110	70	161.5	51	19.5535	66.5	82.3	0.808019	5.2	0.7	1.34	11.99	2.48407	3	1	1	1	5	5	5	5	5	25	2
R1978	male	36	110	70	162.3	51.5	19.5511	71	82	0.865854	6.3	1.12	1.62	14.66	2.68512	3	1	1	1	3	3	5	5	5	21	1
R1982	male	25	138	90	171.5	84.5	28.7295	92	99.5	0.924623	5.5	1.33	1.05	13.1	2.57261	3	2		1	4	5	5	5	5	24	2
R1991	male	23	120	80	174.5	58.5	19.2117	68.7	85.2	0.806338	5.1	0.76	1.38	12.99	2.56418	3	1	1	1	4	5	1	5	4	19	1
R1992	male	21	126	70	174	63	20.8086	77.5	87.5	0.885714	4.7	0.71	2.12	12.11	2.49403	3	2		1	3	4	4	3	4	18	1
R1993	male	40	114	88	163	47	17.6898	92.8	93.1	0.996778	5.2	2.09	1.1	12.66	2.53845	3	1	1	1	3	4	5	5	5	22	2
R1994	male	36	114	84	170.4	85	29.2738	94.9	100.8	0.941468	5.7	4.31	1.02	11.44	2.43712	2	1	1	2	4	5	5	5	5	24	2
R1995	male	35	120	78	169.2	65	22.7045	77.5	89	0.870787	5.3	3.03	1.37	11.73	2.46215	3	1	1	1	4	4	4	5	4	21	1
R1996	male	45	110	80	161.7	59.5	22.7561	78.3	89.8	0.871938	5.1	0.71	1.23	12.25	2.50553	2	1	1	2	3	3	3	3	3	15	1
R1998	male	31	120	82	174.2	67	22.079	79.1	93	0.850538	4.8	1.38	1.89	10.98	2.39608	3	2		1	4	5	5	5	4	23	2
R1999	male	51	112	84	163	51	19.1953	68.5	83	0.825301	5.7	0.78	1.79	11.08	2.40514	3	1	1	1	3	4	5	5	5	22	2
R201	male	21	120	60	162.5	50	18.9349	63.5	83.6	0.759569	4.7	0.85	1.17	10.48	2.34947	3	1	1	1	4	4	4	5	4	21	1
R209	male	41	106	68	165.5	55	20.0801	76.5	87	0.87931	6.1	1.45	1.2	9.68	2.27006	3	1	1	1	4	5	4	5	5	23	2
R220	male	37	100	70	169	68	23.8087	81.9	95.5	0.857592	4.3	1.06	1.16	14.96	2.70538	3	2		1	3	2	4	4	4	17	1
R223	male	35	130	90	165.7	63	22.9454	80	91	0.879121	5.2	0.79	1.88	9.38	2.23858	3	1	2	1	4	5	5	5	4	23	2
R228	male	37	120	86	167.8	77	27.3468	93	96	0.96875	5	2.16	0.83	11.97	2.4824	3	1	1	1	4	5	5	5	5	24	2
R240	male	43	110	70	171.3	73.5	25.048	86	98	0.877551	5.5	0.79	1.2	15.64	2.74983	3	2		2	3	4	4	5	4	20	1
R248	male	56	108	60	159	56.5	22.3488	79	89.3	0.884658	5.2	1.37	1.11	12.06	2.48989	3	1	1	2	3	4	4	5	5	21	1
R252	male	26	130	90	170.5	76	26.1436	86.3	101.7	0.848574	4.8	1.18	1.24	13.59	2.60933	3	2		1	3	4	3	3	3	16	1
R253	male	26	120	60	170.7	53	18.189	70	80.5	0.869565	5.3	0.59	2	13.93	2.63404	3	2		1	3	4	5	5	4	21	1
R256	male	25	104	80	165	55	20.202	70.5	87.5	0.805714	4.6	1.34	1.4	10.49	2.35042	3	2		1	3	3	3	3	4	16	1
R257	male	28	120	84	169	68.5	23.9838	79	94	0.840426	5.2	0.74	1.47	13.6	2.61007	3	2		1	4	2	5	5	2	18	1
R260	male	34	100	70	175.5	69.5	22.5648	85.5	96.3	0.88785	5.9	2.3	1.16	9.77	2.27932	3	1	1	1	3	4	4	5	4	20	1
R264	male	45	130	96	160.3	66.5	25.8794	87.7	94	0.932979	5.7	1.27	1.76	11.78	2.4664	3	1	2	2	3	4	4	5	4	20	1
R276	male	60	126	82	159.6	80.5	31.6031	103	106.5	0.967136	9.4	2.08	1.1	11.44	2.43712	3	1	2	1	3	3	3	5	5	19	1
R283	male	35	114	80	173.2	66	22.0013	79	87.5	0.902857	5.1	0.56	1.3	14.31	2.66096	3	2		1	3	5	4	5	5	22	2
R294	male	38	110	86	170.8	56.5	19.3675	68.5	83.5	0.820359	4.7	0.84	1.25	12.9	2.55723	3	1	1	1	4	5	5	5	5	24	2
R30	male	34	110	68	178.7	79	24.7388	89.8	97.2	0.923868	4.4	0.86	1.21	13.61	2.6108	3	2		2	3	5	5	5	4	22	2
R304	male	38	110	84	172	79	26.7036	87.2	93	0.937634	4.6	1.09	1.52	9.78	2.28034	2	1	1	1	3	4	4	5	4	20	1
R311	male	52	124	78	165.4	68	24.8564	87	94	0.925532	5.1	1.18	1.48	11.79	2.46725	3	2		1	3	4	5	4	3	19	1
R314	male	33	110	80	168.5	59.5	20.9564	72.3	85.8	0.842657	5.3	0.75	1.6	11.4	2.43361	3	2		1	3	3	3	5	4	18	1
R322	male	35	110	60	160.5	67	26.0091	88.2	92	0.958696	5.9	1.57	1.05	15.37	2.73242	3	2		1	3	3	3	4	3	16	1
R33	male	36	90	60	160	69	26.9531	88	97.8	0.899796	5.2	3.33	1.48	10.71	2.37118	3	1	1	1	3	3	3	0	0	9	1
R331	male	26	114	70	169.2	54.5	19.0369	73.1	87	0.84023	5	1.01	1.41	15.5	2.74084	3	1	1	1	3	5	5	5	4	22	2
R335	male	33	110	85	170.8	65.5	22.4525	81.2	93	0.873118	4.5	1.97	1.48	9.79	2.28136	3	1	1	1	3	5	5	5	4	22	2
R338	male	39	130	86	170	79.5	27.5087	98.5	100	0.985	5.2	2.85	1.08	15.97	2.77071	2	1	2	1	3	4	5	5	4	21	1
R339	male	40	130	80	158.7	60	23.8231	86.8	91.7	0.946565	5.6	1.4	1.46	9.74	2.27624	3	2		1	3	5	1	5	5	19	1
R340	male	38	132	88	166.6	63	22.6982	83.5	90	0.927778	5.7	1.55	1.62	11.99	2.48407	3	2		1	5	5	5	5	5	25	2
R346	male	63	100	60	166	54	19.5965	75.8	85.5	0.88655	5.7	0.75	1.83	10.71	2.37118	3	2		1	3	2	2	5	4	16	1
R351	male	57	144	100	165.5	76	27.7471	99.2	93	1.06667	5.7	3.54	1.35	10.19	2.32141	2	1	1	1	3	5	5	5	5	23	2
R357	male	31	120	76	167.5	52	18.5342	66.7	84	0.794048	4.5	0.95	1.99	14.87	2.69935	3	1	1	1	3	5	4	5	4	21	1
R358	male	45	126	80	168	71.5	25.333	83.7	96.8	0.864669	5.5	0.75	1.5	11.73	2.46215	3	2		1	3	4	3	4	5	19	1
R359	male	37	104	70	174	57	18.8268	77	83.6	0.921053	4.6	0.81	1.94	9.92	2.29455	3	2		1	3	4	5	5	4	21	1
R361	male	36	110	60	170.1	58.8	20.3221	70.3	85.3	0.82415	5.3	0.54	1.75	11.09	2.40604	2	1	1	1	3	2	3	5	5	18	1
R364	male	38	122	74	168.1	70	24.7721	90.2	95	0.949474	4.7	2.53	1.22	11.08	2.40514	2	1	1	1	4	5	5	5	5	24	2
R370	male	49	170	112	170.5	80	27.5195	97	99	0.979798	7	3.76	1.2	11.01	2.3988	2	1	2	2	3	3	3	4	4	17	1
R371	male	28	130	80	167.5	75	26.732	87.6	100	0.876	6.7	0.76	1.2	12.95	2.5611	2	2		2	3	4	4	5	4	20	1
R372	male	25	136	90	177.5	82	26.0266	87	97	0.896907	5	0.62	1.3	9.18	2.21703	3	2		1	5	5	5	5	5	25	2
R373	male	26	106	70	163.7	51	19.0315	66	83.5	0.790419	5.1	0.48	1.41	14.04	2.64191	2	2		1	4	4	4	5	4	21	1
R374	male	30	120	78	173	81	27.0641	90.5	100.7	0.898709	5.9	0.95	1.25	13.4	2.59525	2	2		1	4	4	4	5	4	21	1
R375	male	40	140	106	169	94	32.912	97.5	103.5	0.942029	6	3.26	1.38	10.9	2.38876	2	2		1	3	5	4	4	4	20	1
R390	male	61	104	76	159	55.5	21.9532	79.5	87.3	0.910653	5.1	1.12	1.26	14.77	2.6926	2	1	2	2	3	3	3	5	4	18	1
R394	male	64	130	90	161	59	22.7615	82	90.8	0.903084	4.6	1.25	1.41	13.58	2.6086	2	2		2	2	1	1	4	2	10	1
R396	male	68	160	70	163.6	83.5	31.1975	105	102.3	1.02639	5.7	2.33	1.29	15.44	2.73696	1	1	1	1	3	3	3	3	3	15	1
R399	male	67	136	76	164.2	64.5	23.9229	88.2	94	0.938298	5	0.86	1.36	13.19	2.57946	2	2		1	3	2	3	4	3	15	1
R407	male	61	140	80	159	50	19.7777	73.2	85	0.861176	5.1	0.57	1.94	11.53	2.44495	3	1	2	1	3	3	3	5	5	19	1
R41	male	32	110	70	172	56	18.9292	65.7	86.9	0.756041	5.3	1.08	1.37	16.1	2.77882	3	1	1	1	3	4	4	5	4	20	1
R414	male	66	138	94	166.4	75	27.0866	92	97.5	0.94359	5.6	2.36	1.15	12.33	2.51204	2	2		1	3	3	3	4	4	17	1
R428	male	58	110	82	156.5	62.5	25.5183	85	92	0.923913	4.6	1.74	1.38	16.07	2.77695	3	2		2	3	4	5	5	5	22	2
R433	male	53	114	80	177	79	25.2163	99	93	1.06452	4.3	3.25	1.47	14.16	2.65042	3	1	2	1	3	4	4	5	4	20	1
R443	male	43	110	68	160	63	24.6094	75.5	88.5	0.853107	5.6	1.17	1.58	8.62	2.15409	3	1	1	1	4	1	1	4	5	15	1
R444	male	36	110	80	163	58.5	22.0181	75.5	89.2	0.846413	5.5	0.94	2.02	8.05	2.08567	1	1	1	1	3	5	5	5	4	22	2
R45	male	47	118	88	158.2	67	26.7708	82.5	95	0.868421	5.5	3.96	1.06	11.95	2.48073	3	1	2	1	5	4	5	5	5	24	2
R452	male	48	110	80	168.1	68	24.0643	86.5	93	0.930108	5.4	1.02	1.6	14.22	2.65465	3	1	1	1	1	4	2	4	0	11	1
R457	male	29	118	70	164.3	56	20.745	74.3	84.6	0.878251	4.6	1.45	1.17	12.45	2.52172	3	2		1	4	4	4	4	4	20	1
R458	male	46	120	70	169.5	81	28.1933	98.5	98.5	1	5.6	1.92	1.14	11.07	2.40424	3	1	1	1	3	2	1	1	1	8	1
R462	male	37	120	80	168	54	19.1327	77	89.2	0.863229	5.1	1.23	1.8	7.93	2.07065	2	1	1	1	3	3	3	4	4	17	1
R465	male	40	126	86	162.8	69	26.034	88.8	100	0.888	5.2	2.26	1.24	11.89	2.4757	3	1	1	1	4	3	3	5	4	19	1
R466	male	29	122	78	171.7	70.5	23.9138	89.2	97.8	0.912065	5.3	6.37	1.02	8.09	2.09063	3	1	2	1	4	4	5	5	5	23	2
R467	male	34	118	80	177	87.5	27.9294	96	101	0.950495	5.5	1.61	1.44	15.23	2.72327	3	2		1	4	4	4	5	4	21	1
R470	male	37	130	84	165.1	75.5	27.6983	86	95.1	0.904311	4.9	1.91	1.07	10.2	2.32239	3	2		1	4	5	5	5	5	24	2
R474	male	33	120	82	172.6	67.5	22.658	80	93	0.860215	5.3	1.52	1.15	8.42	2.13061	3	1	1	1	3	4	4	5	5	21	1
R478	male	46	110	70	161.2	62.5	24.0519	86.3	92.5	0.932973	5.9	1.44	1.18	14.94	2.70404	3	2		1	4	5	4	4	5	22	2
R480	male	43	114	90	160	54	21.0938	74.8	80.7	0.92689	5.4	0.92	1.5	13.64	2.61301	3	1	1	1	4	5	4	5	4	22	2
R481	male	43	132	80	170.6	82	28.1745	95.5	97	0.984536	5.1	5.56	1.33	10.61	2.3618	3	1	1	1	2	2	2	2	2	10	1
R482	male	35	120	80	159.5	52	20.4401	77	83.7	0.919952	5.7	1.15	2.07	10.59	2.35991	3	2		2	5	5	5	5	5	25	2
R491	male	47	120	80	172.3	64	21.558	80	88.5	0.903955	6.2	3.4	1.22	11.22	2.4177	3	1	1	1	4	4	4	4	4	20	1
R495	male	46	110	70	171.2	75	25.589	85	98.5	0.862944	5.5	2.33	1	11.22	2.4177	3	1	1	2	5	5	5	5	5	25	2
R496	male	44	118	76	178	72.5	22.8822	87.5	95.2	0.919118	5.3	1.99	1.14	11.1	2.40695	3	1	1	2	3	3	3	5	3	17	1
R497	male	44	110	70	175.2	94	30.6238	100.2	100	1.002	12.3	1.81	1.27	15.03	2.71005	3	2		1	5	5	5	5	5	25	2
R498	male	29	120	80	157	68	27.5873	83.7	94	0.890426	5.3	4.26	0.93	12.16	2.49815	3	1	1	1	4	5	5	5	4	23	2
R499	male	53	130	84	162.5	65	24.6154	88	92.4	0.952381	5.4	1.03	1.17	13.85	2.62829	3	1	1	1	3	2	2	3	2	12	1
R501	male	39	164	100	166.3	77	27.8424	92.7	97.2	0.953704	5.5	2.62	1.01	11.77	2.46555	3	2		1	4	5	4	5	5	23	2
R503	male	55	140	88	164.4	67	24.7897	90.5	91.8	0.985839	5.5	2.6	1.32	14.63	2.68307	3	1	1	2	3	3	3	5	4	18	1
R505	male	42	100	76	162.2	57	21.6657	77	88.5	0.870056	5.2	0.59	1.64	10.64	2.36462	3	1	1	1	4	4	5	5	5	23	2
R507	male	45	110	72	167.6	75	26.7001	88	98.9	0.889788	5.3	1.46	1.06	14.49	2.67346	3	1	1	1	3	5	4	0	1	13	1
R509	male	38	106	80	167.1	73	26.1439	95	96	0.989583	5.8	1.15	1.5	12.53	2.52813	3	1	1	1	3	4	4	4	4	19	1
R510	male	34	140	92	169.4	92	32.0598	102.2	107	0.95514	5.4	1.61	1.4	13.95	2.63548	3	1	1	1	4	5	4	5	5	23	2
R512	male	38	126	80	175.1	54	17.6125	70	86	0.813953	5.3	0.5	2.07	10.96	2.39425	3	2		1	4	5	5	5	5	24	2
R514	male	36	116	80	169.5	61	21.232	74.3	89	0.834831	4.9	0.74	1.64	14.75	2.69124	3	2		1	4	5	5	5	4	23	2
R516	male	44	120	68	167.1	60.5	21.6672	78.5	90	0.872222	5.1	1.15	1.21	12.58	2.53211	3	2		2	3	4	4	5	4	20	1
R519	male	47	144	90	169.6	69	23.9882	88	96	0.916667	5.3	1.07	1.61	13.66	2.61447	3	1	1	1	4	4	4	5	4	21	1
R522	male	40	120	78	171.6	79	26.8283	91.2	97	0.940206	5.6	1.55	1.16	11.96	2.48157	3	1	1	1	4	5	5	5	5	24	2
R523	male	54	120	60	163	82	30.863	103.5	100	1.035	5.2	1.35	1.12	15.8	2.76001	3	1	1	1	4	4	4	4	4	20	1
R524	male	45	116	86	170.3	65.5	22.5846	86	91	0.945055	5.7	1.87	1.26	8.09	2.09063	3	1	1	1	3	5	5	5	4	22	2
R527	male	39	118	70	172	62	20.9573	82.2	87.8	0.936219	6	2.3	1.69	11.71	2.46044	2	1	1	1	5	5	5	5	5	25	2
R529	male	50	120	84	170.2	72.5	25.0276	90.5	97	0.93299	4.8	0.64	1.57	11.98	2.48324	3	2		1	3	3	3	3	3	15	1
R530	male	41	100	70	166	65.5	23.7698	83.3	93	0.895699	5	1.32	1.58	12.36	2.51447	3	2		1	4	4	4	5	5	22	2
R531	male	44	120	80	171	71	24.281	89.5	94.5	0.94709	5.1	1.23	1.35	13.26	2.58475	3	1	1	1	3	3	2	3	2	13	1
R532	male	44	124	70	164	47	17.4747	71.5	81.8	0.874083	4.7	1.81	1.17	15.24	2.72392	3	2		1	3	4	5	5	4	21	1
R535	male	51	124	80	168	64	22.6757	89.2	90	0.991111	4.7	3.38	1.1	13.45	2.59898	3	1	1	2	3	3	3	4	3	16	1
R538	male	44	120	80	159.5	54	21.2262	70	83.5	0.838323	4.4	0.75	1.32	15.52	2.74213	3	2		1	2	2	3	3	2	12	1
R54	male	39	110	70	166.3	51.5	18.6218	72.2	83.8	0.861575	5.2	0.77	1.99	13.08	2.57108	3	1	1	1	4	5	5	5	5	24	2
R543	male	48	180	120	171.5	82	27.8795	93.1	101	0.921782	5.5	3.23	1.3	13.6	2.61007	3	2		1	3	3	4	4	4	18	1
R545	male	29	108	72	176	68.5	22.1139	80.7	90.5	0.891713	4.1	0.74	1.37	13.87	2.62973	3	1	1	1	3	5	5	5	4	22	2
R558	male	33	100	58	163.5	56	20.9485	73.5	86	0.854651	5.4	0.97	1.64	10.91	2.38968	3	1	1	2	3	3	3	4	4	17	1
R565	male	34	120	84	168.7	78	27.4072	88.5	95	0.931579	5.4	6.72	1.04	12.05	2.48906	3	2		1	5	5	5	5	0	20	1
R567	male	23	120	80	171.5	51	17.3397	71	81	0.876543	4.3	0.99	1.33	16.11	2.77944	3	1	1	1	4	5	5	5	5	24	2
R572	male	43	130	80	168.5	77	27.1201	95	99	0.959596	4.9	2.88	1.34	11.22	2.4177	2	1	1	1	4	5	5	5	5	24	2
R574	male	24	110	76	172.5	57.5	19.3237	71	86	0.825581	4.7	0.63	1.42	13.07	2.57032	3	1	1	1	3	2	4	5	4	18	1
R581	male	27	108	70	179	84	26.2164	88.3	102.1	0.864838	4.6	2.39	1.09	10.79	2.37862	3	1	1	1	3	4	4	5	4	20	1
R584	male	29	120	90	168.5	73	25.7112	86.3	95	0.908421	4.7	3.48	1.14	13.88	2.63045	3	1	1	1	3	5	5	5	5	23	2
R585	male	43	168	102	160.3	68.5	26.6578	89	93	0.956989	4.9	2.01	1.56	11.49	2.44148	3	1	1	1	3	4	4	5	5	21	1
R590	male	26	110	70	174.5	61	20.0327	70.5	89	0.792135	4.7	0.38	1.68	15.6	2.74727	3	1	1	1	4	2	3	5	4	18	1
R594	male	38	102	80	167.1	75	26.8601	96	95	1.01053	4.4	1.52	1.29	9.47	2.24813	3	1	1	1	5	5	5	5	5	25	2
R595	male	40	120	80	163.5	72	26.9338	86.6	93	0.931183	4.6	2.02	0.96	10.9	2.38876	3	1	1	1	3	4	5	5	4	21	1
R601	male	25	108	80	169.4	52	18.1208	64	85.1	0.752056	4.9	1.38	1.43	14.35	2.66375	3	2		1	3	4	4	4	4	19	1
R602	male	26	120	90	176.8	94	30.0721	94.6	106	0.892453	5.6	1.47	1.18	12.56	2.53052	3	1	1	1	3	5	5	5	5	23	2
R606	male	46	120	70	158.8	52.5	20.8189	75	87.1	0.861079	4.9	1.22	1.27	12.44	2.52092	3	1	1	1	5	5	5	5	5	25	2
R609	male	30	110	60	163.8	57	21.2445	70.2	86.5	0.811561	5.6	0.53	1.71	14.72	2.68921	3	2		1	4	4	5	5	4	22	2
R610	male	56	124	80	166.3	59.5	21.5146	73.8	91	0.810989	5.6	0.98	1.72	13.33	2.59002	3	1	1	1	2	4	4	4	5	19	1
R611	male	27	130	76	167	59	21.1553	78	91.8	0.849673	5.2	1.18	1.26	13.28	2.58626	3	2		1	4	4	4	5	5	22	2
R616	male	23	118	70	156.5	49	20.0063	70	82	0.853659	4.9	0.97	1.64	15.01	2.70872	3	2		1	4	4	5	5	4	22	2
R617	male	34	126	88	174.7	88.5	28.9973	100.2	103	0.972816	4.8	2.98	1.37	11.91	2.47738	3	1	1	1	5	5	5	5	5	25	2
R618	male	31	130	90	158.1	67.5	27.0047	89.2	96	0.929167	5.2	2.56	1.4	11.13	2.40964	3	1	1	1	4	5	5	5	4	23	2
R621	male	52	128	80	162	70	26.6728	87	93.5	0.930481	5.2	0.57	1.55	12.87	2.5549	3	1	1	1	3	3	4	5	4	19	1
R624	male	43	120	74	167.5	68	24.237	82	96.3	0.851506	5.2	0.73	1.69	13.22	2.58173	3	1	1	1	4	3	3	3	3	16	1
R633	male	30	110	70	166.8	59.5	21.3858	79.2	91	0.87033	5	0.61	1.73	15.56	2.7447	3	2		1	4	4	5	5	5	23	2
R651	male	24	130	82	176.5	99.5	31.9399	98.6	108.7	0.907084	4.8	2.03	1.03	13.81	2.62539	3	1	1	1	4	4	5	5	4	22	2
R658	male	48	108	70	164.5	60	22.1727	83	89	0.932584	15.6	2.14	1.2	12.73	2.54396	2	1	1	1	3	4	4	5	4	20	1
R659	male	41	110	66	172.7	63.5	21.2907	78	91	0.857143	5.4	0.96	1.16	12.14	2.49651	3	2		1	3	4	5	5	5	22	2
R66	male	33	130	76	171.3	67	22.8328	79	94	0.840426	5	1.09	1.17	13.43	2.59749	2	1	1	2	4	4	4	4	4	20	1
R661	male	29	100	68	165.5	79	28.8424	91.4	100.5	0.909453	4.9	2.08	1.09	12.9	2.55723	3	2		1	4	5	5	5	4	23	2
R662	male	49	120	80	168.4	67.5	23.8023	80	87.9	0.910125	5.4	0.59	1.55	14.38	2.66584	3	2		1	3	4	4	4	4	19	1
R663	male	51	110	80	156.6	65	26.5051	90.5	95.5	0.947644	5	1.35	1.18	11.4	2.43361	3	2		1	3	4	4	5	5	21	1
R674	male	23	116	82	177.5	55.5	17.6156	66.3	87.5	0.757714	4.9	0.78	1.6	14.82	2.69598	3	2		1	5	0	0	0	0	5	1
R680	male	41	128	82	171.7	74.5	25.2706	87.2	95.5	0.913089	5.8	1.07	1.14	14.01	2.63977	3	1	1	1	5	4	3	5	4	21	1
R685	male	28	120	70	170	63.5	21.9723	76.4	88	0.868182	5.4	1.06	1.45	10.91	2.38968	2	2		1	5	5	5	5	5	25	2
R688	male	25	96	60	162.2	58.5	22.2359	73	88	0.829545	5.3	0.84	1.21	10.09	2.31154	3	2		1	5	0	0	0	0	5	1
R692	male	28	106	64	167.8	59	20.9541	68	87	0.781609	5.3	0.96	1.52	15.16	2.71866	3	1	1	1	3	2	3	5	4	17	1
R693	male	34	140	70	164.5	52.5	19.4012	71	82.7	0.858525	13.1	1.18	1.06	13.67	2.6152	3	1	1	2	4	4	4	5	4	21	1
R711	male	28	110	76	172.8	60	20.0939	76.3	92	0.829348	4.6	2.19	1.2	13.29	2.58701	3	1	1	1	3	4	5	5	5	22	2
R712	male	29	110	70	173.6	70	23.2273	79.5	93.6	0.849359	4.5	1.49	1.3	15.29	2.7272	3	2		1	5	5	5	5	5	25	2
R714	male	28	130	74	173.7	62	20.5491	72.8	88.5	0.822599	4.8	1.02	1.29	13.55	2.60639	3	1	1	1	4	5	5	5	4	23	2
R74	male	57	126	86	161.9	49	18.694	71.3	82	0.869512	5.5	0.78	1.93	10.14	2.31649	3	1	1	1	3	4	5	5	5	22	2
R81	male	37	130	80	173.1	66	22.0267	82	90	0.911111	5.5	0.86	1.62	14.26	2.65746	2	1	2	1	3	5	5	5	1	19	1
R88	male	40	120	90	163.6	63	23.5382	85	89.8	0.946548	4.9	1.42	1.13	13.89	2.63117	3	2		1	4	5	5	5	5	24	2
R90	male	51	140	90	168.1	53	18.756	85.5	91	0.93956	5.5	1.13	1.17	15.37	2.73242	3	2		1	3	4	4	5	4	20	1
R958	male	32	120	70	168.7	75.5	26.5287	85.3	97.2	0.877572	5.4	8.29	1.39	14.07	2.64404	3	1	1	1	4	5	5	5	5	24	2
R960	male	58	140	90	160.8	70	27.0723	94.7	95	0.996842	4.8	1.11	1.41	15.88	2.76506	3	2		2	3	4	5	5	5	22	2
R965	male	59	140	90	167	60	21.5139	71.1	87.2	0.815367	4.5	0.74	2.06	12.64	2.53687	3	1	1	1	3	4	5	5	5	22	2
R979	male	42	110	75	167	66.5	23.8445	82	88	0.931818	5.7	0.58	1.7	12.69	2.54081	2	2		1	3	4	4	4	4	19	1
R984	male	65	160	90	157.3	60	24.249	93.5	90.5	1.03315	5.1	1.71	1.83	13.31	2.58852	1	2		1	2	3	2	3	3	13	1
R985	male	55	110	80	163	55.5	20.889	68.5	81	0.845679	4.7	1.39	1.55	10.73	2.37304	2	2		1	2	3	3	4	4	16	1
R988	male	56	120	50	152	58.5	25.3203	71.2	81	0.879012	4.6	0.54	1.66	12.04	2.48823	2	1	1	1	3	4	4	5	5	21	1
R996	male	44	110	80	155.2	48.5	20.1353	73	82	0.890244	4.9	0.41	2.58	13.71	2.61813	2	1	2	1	5	5	5	5	5	25	2
R998	male	28	120	80	169	65	22.7583	82.5	93	0.887097	6.3	2.2	1.04	12.85	2.55334	3	1	1	1	5	5	5	5	5	25	2
Z105	male	26	110	70	166.5	61.5	22.1843	78.8	91	0.865934	5.1	0.96	1.53	10.9	2.38876	3	2		2	5	5	5	5	5	25	2
Z117	male	56	140	90	166.7	79.5	28.6086	94.5	102	0.926471	7	2.01	1.04	16.56	2.80699	3	1	2	1	4	5	5	5	5	24	2
Z118	male	41	120	80	169.3	68	23.7244	75	89.9	0.83426	4.9	1.33	1.95	12.63	2.53607	3	2		1	4	5	5	5	5	24	2
Z123	male	38	102	64	171.6	70.5	23.9417	80.7	94.3	0.855779	5.3	0.6	1.39	15.14	2.71734	3	1	1	1	4	4	5	5	4	22	2
Z126	male	24	120	80	166	60.5	21.9553	78.5	91.5	0.857923	5.5	2.69	1.11	13.4	2.59525	3	1	1	1	5	5	5	5	4	24	2
Z134	male	27	100	74	164	47	17.4747	63.4	82	0.773171	5.3	0.42	1.21	15.18	2.71998	3	2		2	3	2	2	3	2	12	1
Z135	male	38	110	80	168	56.5	20.0184	77	87.5	0.88	4.5	0.75	1.25	11.95	2.48073	3	2		1	3	5	5	5	5	23	2
Z142	male	34	108	70	176	75	24.2123	85.5	96.5	0.88601	5.3	0.72	2.18	15.12	2.71602	3	1	1	1	3	4	3	4	3	17	1
Z177	male	39	120	86	169.2	71	24.8003	88	96.5	0.911917	5.4	0.97	1.25	14.67	2.6858	2	2		1	4	5	5	5	4	23	2
Z180	male	45	145	84	175.4	59.5	19.3401	76.6	88	0.870455	5.6	0.91	2.45	10.42	2.34373	2	1	1	1	3	2	2	5	4	16	1
Z184	male	38	110	70	168	50	17.7154	75.8	83	0.913253	4.8	0.96	1.69	16.15	2.78192	3	2		1	4	4	4	5	4	21	1
Z188	male	31	110	62	170.5	57.7	19.8485	72	86.1	0.836237	6.1	0.76	1.84	9.68	2.27006	3	1	1	1	3	4	5	5	5	22	2
Z200	male	44	130	70	158.5	54.5	21.6939	76	85.8	0.885781	5.1	1.56	1.6	11.84	2.47148	2	1	1	1	3	2	3	5	3	16	1
Z209	male	35	112	74	176.2	76	24.4795	86.6	99	0.874747	4.9	3.12	0.94	12.93	2.55955	3	2		2	4	5	5	5	5	24	2
Z214	male	47	110	80	163	66	24.841	81	92.6	0.87473	5.6	1.36	1.22	10.03	2.30558	3	2		1	3	4	4	4	4	19	1
Z220	male	33	100	70	174.2	74	24.3857	89	99.5	0.894472	5.4	3.24	1.11	10.45	2.3466	2	1	1	1	4	5	5	5	5	24	2
Z221	male	55	130	90	160.5	61.5	23.874	81.7	88.7	0.921082	5.1	1	1.22	12.52	2.52733	3	2		2	5	5	5	5	5	25	2
Z224	male	46	126	84	165.7	75	27.3159	89.3	98.4	0.90752	4	0.59	1.5	13.79	2.62394	3	2		1	4	5	5	5	4	23	2
Z226	male	46	110	80	174.2	71	23.3971	86.7	97.5	0.889231	5.3	2.37	1.3	15.5	2.74084	3	1	1	1	4	4	4	5	4	21	1
Z227	male	29	108	70	167.2	59	21.1047	73.5	88	0.835227	4.7	0.5	1.59	12.33	2.51204	3	2		1	3	4	4	5	4	20	1
Z228	male	40	120	78	172.3	83	27.9581	95	100	0.95	5.1	0.67	1.4	9.67	2.26903	3	2		1	4	4	4	4	4	20	1
Z231	male	60	150	84	159	67.5	26.6999	89.5	93.2	0.9603	5.3	1.08	1.3	8.09	2.09063	3	2		2	2	4	4	5	5	20	1
Z233	male	44	116	86	168.6	82.5	29.0228	99.3	101	0.983168	5.5	1.2	1.11	14.65	2.68444	3	1	2	1	3	5	5	5	5	23	2
Z235	male	42	120	80	168	51	18.0697	70	84	0.833333	4.3	0.87	2.29	11.31	2.42569	3	2		1	3	5	5	5	4	22	2
Z246	male	48	140	100	171.4	96	32.6776	106	109	0.972477	6.1	1.18	1.14	12.88	2.55568	3	1	1	1	4	5	5	5	5	24	2
Z250	male	36	100	60	173.9	68.5	22.6512	81.2	94	0.86383	5.3	2.07	1.11	11.93	2.47906	3	1	1	1	5	5	5	5	4	24	2
Z254	male	26	110	80	165.3	52.5	19.2138	69.1	86.5	0.798844	5.5	1.41	1.44	11.79	2.46725	2	2		1	5	5	5	5	5	25	2
Z255	male	36	150	110	185.4	80	23.274	86	99	0.868687	6.3	10.91	1.87	15.97	2.77071	3	2		1	5	5	5	5	4	24	2
Z258	male	41	120	84	172.6	90	30.2107	101.3	103.5	0.978744	5.9	2.7	1.38	13.33	2.59002	3	2		1	4	4	4	5	4	21	1
Z261	male	30	130	90	165	53	19.4674	66	83	0.795181	4.6	0.65	1.66	11.02	2.39971	3	1	1	1	5	5	5	5	5	25	2
Z267	male	57	144	86	163.5	76	28.4301	89.3	100.4	0.889442	5.7	1.41	0.96	13.84	2.62756	3	2		1	3	1	2	5	3	14	1
Z270	male	55	158	90	175	73	23.8367	87.2	91.7	0.950927	5.3	1.96	1.17	11.83	2.47064	3	2		2	1	3	3	2	3	12	1
Z273	male	60	130	80	170.3	65.5	22.5846	82.6	92.5	0.892973	6.4	2.01	1.87	15.17	2.71932	3	1	1	2	3	5	5	5	3	21	1
Z281	male	47	170	118	171.7	80	27.1362	91.2	96	0.95	5.6	1.48	1.41	15.86	2.7638	3	2		1	3	3	4	3	4	17	1
Z284	male	34	100	70	168	64	22.6757	82.7	91.3	0.905805	5.1	1.76	1.64	9.86	2.28849	3	1	1	1	3	5	5	5	4	22	2
Z286	male	38	100	62	164	71.5	26.5839	81	91.6	0.884279	5.3	1.48	1.27	11	2.3979	3	2		1	5	5	5	5	5	25	2
Z287	male	25	120	80	177	62.5	19.9496	68.5	87	0.787356	5.2	1.45	1.02	15.77	2.75811	3	2		1	4	5	5	5	5	24	2
Z289	male	38	124	86	172.6	77	25.8469	89.6	100	0.896	4.7	1.5	1.36	10.42	2.34373	3	1	1	1	4	5	5	5	4	23	2
Z291	male	36	130	90	173.5	75.5	25.0812	95.6	102	0.937255	5	1.19	1.23	14.47	2.67208	3	2		1	4	5	5	5	4	23	2
Z294	male	35	102	66	164	69	25.6544	83.5	94.6	0.882664	4.8	2	1.78	13.68	2.61593	3	2		1	3	4	4	4	4	19	1
Z296	male	38	110	80	164.2	63	23.3665	82.3	90.5	0.909392	4.8	1.9	1.05	14.67	2.6858	3	2		1	5	5	5	5	5	25	2
Z301	male	44	104	82	175	85	27.7551	91.5	101	0.905941	5.1	1.01	1.26	13.37	2.59301	3	2		2	4	5	5	5	5	24	2
Z303	male	27	110	60	163	56.5	21.2654	71	83	0.855422	5.2	0.98	1.27	8.92	2.1883	3	2		2	3	5	5	5	1	19	1
Z304	male	26	114	70	170.7	76	26.0823	88	96.4	0.912863	5.7	2.61	1.21	12.33	2.51204	3	1	1	1	4	4	4	3	3	18	1
Z305	male	55	138	84	172.9	78	26.0918	95.5	99	0.964646	4.3	1.17	1.54	15.11	2.71536	3	2		1	3	3	3	3	3	15	1
Z311	male	35	120	90	166.4	70.5	25.4614	84.3	93.2	0.904506	5.4	1.78	1.25	13.08	2.57108	3	2		1	4	4	4	5	4	21	1
Z314	male	36	110	70	169.3	61	21.2822	76.5	88.5	0.864407	4.6	1.29	1.63	11.09	2.40604	3	1	1	1	5	5	5	5	5	25	2
Z324	male	34	100	70	164	46.5	17.2888	67	83	0.807229	4.8	0.73	1.66	14.37	2.66514	3	1	1	1	5	5	5	5	5	25	2
Z326	male	47	130	88	164.5	61	22.5423	84.5	86.7	0.974625	6	1.18	1.28	12.07	2.49072	3	1	1	1	2	3	3	5	3	16	1
Z338	male	50	100	68	161.2	55	21.1657	74.5	85.5	0.871345	5	1.12	1.49	14.3	2.66026	3	2		1	4	4	4	4	4	20	1
Z342	male	34	130	80	163.6	71	26.5272	83.5	92.6	0.901728	5.6	6.61	1.04	10.82	2.3814	2	1	1	2	4	1	1	5	1	12	1
Z348	male	29	140	80	167	65	23.3067	78.9	94	0.839362	5.3	0.53	1.67	16.35	2.79423	2	1	1	1	5	5	5	5	5	25	2
Z350	male	50	138	88	176	104	33.5744	113.3	112.5	1.00711	6.9	3.16	1.15	14.82	2.69598	3	2		1	4	4	4	4	4	20	1
Z351	male	51	110	70	164.5	50	18.4773	67	82.7	0.810157	5.4	0.6	1.61	8.24	2.109	3	1	1	2	3	5	5	5	5	23	2
Z353	male	33	130	80	175.2	72	23.4566	86.6	100	0.866	6	0.96	1.91	11.44	2.43712	3	1	1	1	3	5	5	5	4	22	2
Z354	male	31	140	90	169.5	84.5	29.4115	100	105	0.952381	5.9	9.4	1.65	12.91	2.558	3	1	1	1	4	4	5	5	4	22	2
Z357	male	38	120	76	167.5	70	24.9499	87.7	96.3	0.910696	5.7	0.96	1.19	14.96	2.70538	3	2		1	5	5	5	5	4	24	2
Z362	male	24	110	72	173.2	54	18.0011	75	89	0.842697	5.4	2.2	1.27	10.9	2.38876	3	1	1	1	4	4	4	5	5	22	2
Z365	male	38	110	72	176.5	71	22.7913	83	97	0.85567	6	1.32	1.04	13.23	2.58249	3	2		1	5	5	5	5	5	25	2
Z367	male	24	106	76	165.5	75	27.382	87.5	96	0.911458	4.9	1.68	1.58	12.98	2.56341	3	2		1	4	4	4	5	5	22	2
Z368	male	32	110	80	165.2	65	23.8173	78.2	91.6	0.853712	4.2	3.71	1.01	15.83	2.76191	3	1	1	2	4	5	5	5	5	24	2
Z369	male	37	100	62	168	72	25.5102	83.5	92.6	0.901728	4.5	0.51	1.47	9.42	2.24284	3	1	1	2	2	4	3	4	4	17	1
Z370	male	45	120	78	168.3	51.5	18.1819	69.5	84.5	0.822485	6	1.54	1.65	10.12	2.31451	3	1	1	1	5	5	5	5	5	25	2
Z372	male	37	128	80	160	61	23.8281	75.2	88	0.854545	5.8	0.9	1.22	13.04	2.56802	3	1	1	1	4	4	5	5	4	22	2
Z376	male	33	110	60	173.1	78	26.0316	88.1	96	0.917708	5.9	2.41	1.11	10.95	2.39334	3	1	1	1	4	4	4	5	4	21	1
Z377	male	28	140	90	168.8	57.5	20.1801	72.2	88	0.820455	5.2	0.7	1.51	11.85	2.47233	2	2		1	4	4	5	5	5	23	2
Z379	male	30	112	78	167	63	22.5896	82	91	0.901099	5	1.29	1.2	15.55	2.74406	3	2		2	4	4	4	5	4	21	1
Z380	male	37	100	64	169.3	59	20.5844	72	86.5	0.83237	5.6	1.29	1.36	12.99	2.56418	3	1	1	1	3	5	5	4	5	22	2
Z384	male	29	134	88	165.6	64.5	23.5201	78	92	0.847826	5.2	2.5	1.33	12.26	2.50634	3	1	1	1	5	5	5	5	5	25	2
Z385	male	29	110	70	163	50.5	19.0071	69.6	85	0.818824	5.1	0.87	1.65	13.93	2.63404	3	2		1	5	5	4	5	3	22	2
Z387	male	32	100	70	165.5	60	21.9056	77	87.5	0.88	5	0.59	1.69	15.4	2.73437	3	1	1	1	3	5	5	5	4	22	2
Z389	male	27	118	78	168.2	72.5	25.6263	85	94	0.904255	5	0.48	1.68	12.4	2.5177	3	1	2	1	3	5	4	4	4	20	1
Z392	male	39	120	80	160.2	78	30.3927	99.3	101	0.983168	5.3	2.47	0.89	12.47	2.52333	3	1	1	1	4	4	4	4	4	20	1
Z397	male	40	110	80	164.5	49	18.1077	71.3	82.9	0.860072	4.8	1.44	2.07	13.14	2.57566	3	1	1	1	4	5	5	5	5	24	2
Z404	male	30	117	80	163	67	25.2174	84.3	94	0.896809	5.9	2.25	1	14.22	2.65465	3	2		1	4	5	5	5	4	23	2
Z409	male	40	110	80	165.5	76.5	27.9296	92.8	100	0.928	6.6	3.6	1	9.41	2.24177	3	1	1	1	2	4	3	3	1	13	1
Z410	male	28	120	70	170.8	65.5	22.4525	81.6	88.5	0.922034	5.1	1.77	1.15	12.45	2.52172	3	1	1	1	4	4	4	5	4	21	1
Z415	male	46	140	90	170.9	67.5	23.111	88.4	89	0.993258	6.2	1.77	0.96	14.96	2.70538	3	1	1	1	3	5	5	5	5	23	2
Z434	male	30	110	80	168.2	52.5	18.557	70	80	0.875	5.5	1	1.64	11.29	2.42392	3	1	1	1	4	4	5	5	4	22	2
Z438	male	39	118	70	162.7	65.5	24.7438	85	91	0.934066	5.4	1.48	1.55	12.32	2.51122	3	1	1	1	3	5	5	4	4	21	1
Z444	male	41	100	80	169.6	64	22.2499	78	89.8	0.868597	6.1	0.64	1.65	13.47	2.60046	2	2		1	3	4	4	5	4	20	1
Z467	male	36	120	80	161.2	54	20.7809	69	85	0.811765	6.1	1.18	2.07	15.05	2.71138	2	1	1	1	4	5	5	5	4	23	2
Z471	male	40	140	80	167	58.5	20.976	67.6	85.3	0.792497	5.1	0.75	2.01	14.82	2.69598	2	2		1	3	4	5	5	4	21	1
Z487	male	25	94	72	160	67	26.1719	82.5	94.5	0.873016	4.7	1.54	1.35	15.26	2.72524	3	2		1	3	4	2	5	5	19	1
Z489	male	35	112	84	164.9	70.5	25.9267	80	94.6	0.845666	4.9	1.52	1.25	15.94	2.76883	3	2		2	3	4	5	5	5	22	2
Z490	male	42	120	80	166.1	56.5	20.479	73.9	87.5	0.844571	5.2	1.04	1.45	15.21	2.72195	2	1	1	1	4	5	5	5	5	24	2
Z491	male	31	124	88	167.5	66	23.5242	88.3	92.8	0.951509	4.3	1.74	1.64	14.57	2.67896	3	1	1	1	5	5	5	5	5	25	2
Z493	male	36	104	90	161.3	58	22.2925	79.5	90	0.883333	4.7	0.94	1.31	12.57	2.53131	2	2		1	4	4	4	5	4	21	1
Z495	male	39	96	70	167	68	24.3824	74.5	92.5	0.805405	5.4	0.63	1.25	13.3	2.58776	3	1	1	1	3	4	5	5	5	22	2
Z496	male	37	100	60	159	62	24.5243	82	94	0.87234	4.6	0.56	1.12	12.26	2.50634	3	1	1	2	3	4	4	5	3	19	1
Z497	male	30	108	70	162	68.5	26.1012	81.5	92.5	0.881081	5.2	2.66	1.45	13.91	2.63261	2	1	1	1	2	2	2	4	4	14	1
Z498	male	30	110	70	167	70	25.0995	81.8	93.2	0.877682	4.8	1.96	1.05	14.62	2.68239	2	1	2	1	5	5	5	5	5	25	2
Z499	male	34	110	70	170.5	78.5	27.0036	90.8	96.5	0.940933	5.5	1.36	1.11	11.99	2.48407	3	2		1	3	3	5	5	5	21	1
Z62	male	42	120	78	165.7	66.5	24.2201	87.3	89.5	0.975419	4.6	3.11	1.35	15.39	2.73372	2	1	2	1	4	5	5	5	5	24	2
Z63	male	51	130	80	162	78	29.7211	92	97	0.948454	4.6	1.17	1.44	12.48	2.52413	3	2		1	3	2	2	4	5	16	1
Z64	male	43	120	78	171.7	74.5	25.2706	87	95	0.915789	5.3	0.91	1.52	13.52	2.60417	3	2		1	4	5	5	5	4	23	2
Z65	male	36	104	84	170.8	71.5	24.5093	83	94	0.882979	5.8	0.43	1.51	15.33	2.72981	3	2		1	3	4	5	5	4	21	1
Z95	male	47	116	76	165	62.5	22.9568	84	89.5	0.938547	5	3.66	1.01	12.39	2.51689	3	2		1	3	4	4	5	4	20	1
